# Supplementary material for: Peptidomic changes in the milk of water buffaloes (Bubalus bubalis) with intramammary infection by non-aureus staphylococci
Source: Sci Rep. 2022 May 19;12:8371. doi: 10.1038/s41598-022-12297-z (PMC9120474; doi:10.1038/s41598-022-12297-z)
Supplement: Supplementary file 2 — Supplementary Table 2. [file 41598_2022_12297_MOESM2_ESM.xlsx]

## Sheet: Total healthy
Total peptides identified in healthy milk samples.
Sequence	Theo. MH+ [Da]	Master Protein Accessions	Protein names	Gene names
TKLTEEDKNRLNFLKKISQHYQKFAWPQYLKTVYQYQK	4805.56	NP_001277794.1	Alpha-S2-casein	CASA2
KISQHYQKFAWPQYLKTVYQYQK	2975.56	NP_001277794.1	Alpha-S2-casein	CASA2
ISQHYQKFAWPQYLKTVYQYQK	2847.46	NP_001277794.1	Alpha-S2-casein	CASA2
KISQHYQKFAWPQYLK	2065.1	NP_001277794.1	Alpha-S2-casein	CASA2
WPELENGQPTSEK	1514.71	NP_001277801.1	Na(+)-dependent phosphate cotransporter 2B	Slc34a2
AKPEKAKETEKDDTGTPITKIEFVPSH	2996.56	NP_001277801.1	Na(+)-dependent phosphate cotransporter 2B	Slc34a2
WPELENGQPTSEKYTVK	2005.99	NP_001277801.1	Na(+)-dependent phosphate cotransporter 2B	Slc34a2
SAKPEKAKETEKDDTGTPITKIEFVPSH	3083.59	NP_001277801.1	Na(+)-dependent phosphate cotransporter 2B	Slc34a2
TPITKIEFVPSH	1368.75	NP_001277801.1	Na(+)-dependent phosphate cotransporter 2B	Slc34a2
GTPITKIEFVPSH	1425.77	NP_001277801.1	Na(+)-dependent phosphate cotransporter 2B	Slc34a2
KPEKAKETEKDDTGTPITKIEFVPSH	2925.52	NP_001277801.1	Na(+)-dependent phosphate cotransporter 2B	Slc34a2
WPELENGQPTSEKYTVKADGEQS	2593.21	NP_001277801.1	Na(+)-dependent phosphate cotransporter 2B	Slc34a2
DDTGTPITKI	1060.55	NP_001277801.1	Na(+)-dependent phosphate cotransporter 2B	Slc34a2
WPELENGQPTSEKYTVKADGEQ	2506.17	NP_001277801.1	Na(+)-dependent phosphate cotransporter 2B	Slc34a2
APWPELENGQPTSEKYTVK	2174.08	NP_001277801.1	Na(+)-dependent phosphate cotransporter 2B	Slc34a2
APWPELENGQPTSEKYTVKADGEQS	2761.3	NP_001277801.1	Na(+)-dependent phosphate cotransporter 2B	Slc34a2
WPELENGQPTSEKY	1677.78	NP_001277801.1	Na(+)-dependent phosphate cotransporter 2B	Slc34a2
TGTPITKIEFVPSH	1526.82	NP_001277801.1	Na(+)-dependent phosphate cotransporter 2B	Slc34a2
DTIAQAASTTTISDAVSKVKIQVNKAFLDSR	3278.76	NP_001277812.1	lactoperoxidase	LPO
TTLSSEAPTTQQLSEYFKHAKGQTR	2809.41	NP_001277812.1	lactoperoxidase	LPO
DTIAQAASTTTISDAVSKVKIQVNK	2589.41	NP_001277812.1	lactoperoxidase	LPO
DTIAQAASTTTISDAVSKVKIQVNKAFLDSRTR	3535.91	NP_001277812.1	lactoperoxidase	LPO
LKTTLSSEAPTTQQLSEYFKHAKGQTR	3050.59	NP_001277812.1	lactoperoxidase	LPO
LKTTLSSEAPTTQQLSEYFKHAKGQT	2894.49	NP_001277812.1	lactoperoxidase	LPO
DTIAQAASTTTISDAVSKVKIQVNKA	2660.45	NP_001277812.1	lactoperoxidase	LPO
DTIAQAASTTTISDAVSKVK	2007.06	NP_001277812.1	lactoperoxidase	LPO
TTLSSEAPTTQQLSEYFKHAKGQT	2653.31	NP_001277812.1	lactoperoxidase	LPO
AASTTTISDAVSKVKIQVNKA	2132.19	NP_001277812.1	lactoperoxidase	LPO
TRLKTTLSSEAPTTQQLSEYFKHAKGQT	3151.64	NP_001277812.1	lactoperoxidase	LPO
ASTTTISDAVSKVKIQVNK	1990.12	NP_001277812.1	lactoperoxidase	LPO
TRLKTTLSSEAPTTQQLSEYFKHAKGQTR	3307.74	NP_001277812.1	lactoperoxidase	LPO
HAKGQTRTAIRNGQVWEESFKRL	2712.44	NP_001277812.1	lactoperoxidase	LPO
TAIRNGQVWEESFKRL	1934.02	NP_001277812.1	lactoperoxidase	LPO
AIRNGQVWEESFKRL	1832.98	NP_001277812.1	lactoperoxidase	LPO
LSSEAPTTQQLSEYFKHAKGQT	2451.22	NP_001277812.1	lactoperoxidase	LPO
LKTTLSSEAPTTQQLSEYFK	2272.17	NP_001277812.1	lactoperoxidase	LPO
LSSEAPTTQQLSEYFKHAKGQTRT	2708.36	NP_001277812.1	lactoperoxidase	LPO
LSSEAPTTQQLSEYFKHAKGQTR	2607.32	NP_001277812.1	lactoperoxidase	LPO
ASTTTISDAVSKVK	1407.77	NP_001277812.1	lactoperoxidase	LPO
QVWEESFKRL	1321.69	NP_001277812.1	lactoperoxidase	LPO
GQVWEESFKRL	1378.71	NP_001277812.1	lactoperoxidase	LPO
IRNGQVWEESFKRL	1761.94	NP_001277812.1	lactoperoxidase	LPO
AFLDSRTRLKTTLSSEAPTTQQLSEYFKHAKGQTR	3997.09	NP_001277812.1	lactoperoxidase	LPO
ASTTTISDAVSKVKIQVNKAFLDSRTR	2936.62	NP_001277812.1	lactoperoxidase	LPO
NGQVWEESFKRL	1492.75	NP_001277812.1	lactoperoxidase	LPO
TIAQAASTTTISDAVSKVK	1892.03	NP_001277812.1	lactoperoxidase	LPO
RNGQVWEESFKRL	1648.86	NP_001277812.1	lactoperoxidase	LPO
TTLSSEAPTTQQLSEYFK	2030.99	NP_001277812.1	lactoperoxidase	LPO
DTIAQAASTTTISDAVSKVKIQVN	2461.31	NP_001277812.1	lactoperoxidase	LPO
ASTTTISDAVSKVKIQVNKAFLDSR	2679.47	NP_001277812.1	lactoperoxidase	LPO
DTIAQAASTTTISDAVSK	1779.9	NP_001277812.1	lactoperoxidase	LPO
AASTTTISDAVSKVK	1478.81	NP_001277812.1	lactoperoxidase	LPO
ASTTTISDAVSKVKIQVNKA	2061.16	NP_001277812.1	lactoperoxidase	LPO
VWEESFKRL	1193.63	NP_001277812.1	lactoperoxidase	LPO
TAIRNGQVWEESFK	1664.84	NP_001277812.1	lactoperoxidase	LPO
AFLDSRTRLKTTLSSEAPTTQQLSEYFKHAKGQT	3840.99	NP_001277812.1	lactoperoxidase	LPO
NGQVWEESFK	1223.57	NP_001277812.1	lactoperoxidase	LPO
GQVWEESFK	1109.53	NP_001277812.1	lactoperoxidase	LPO
KTTLSSEAPTTQQLSEYFK	2159.09	NP_001277812.1	lactoperoxidase	LPO
TRLKTTLSSEAPTTQQLSEYFK	2529.32	NP_001277812.1	lactoperoxidase	LPO
ASTTTISDAVSKVKIQVNKAFLDSRTRL	3049.7	NP_001277812.1	lactoperoxidase	LPO
SSEAPTTQQLSEYFKHAKGQTR	2494.23	NP_001277812.1	lactoperoxidase	LPO
AIRNGQVWEESFK	1563.79	NP_001277812.1	lactoperoxidase	LPO
IRNGQVWEESFK	1492.75	NP_001277812.1	lactoperoxidase	LPO
LSSEAPTTQQLSEYFK	1828.9	NP_001277812.1	lactoperoxidase	LPO
TLSSEAPTTQQLSEYFK	1929.94	NP_001277812.1	lactoperoxidase	LPO
IQVNKAFLDSRTRL	1660.95	NP_001277812.1	lactoperoxidase	LPO
SEAPTTQQLSEYFK	1628.78	NP_001277812.1	lactoperoxidase	LPO
LSSEAPTTQQLSEYFKHAKG	2222.11	NP_001277812.1	lactoperoxidase	LPO
LKTTLSSEAPTTQQLSEYFKHAKGQTRT	3151.64	NP_001277812.1	lactoperoxidase	LPO
VKIQVNKAFLDSRTRL	1888.11	NP_001277812.1	lactoperoxidase	LPO
IQVNKAFLDSRTR	1547.87	NP_001277812.1	lactoperoxidase	LPO
NNMGYEINKVRA	1408.7	NP_001277842.1	lipoprotein lipase precursor
DRITGGKDFRDIESKFALR	2224.18	NP_001277842.1	lipoprotein lipase precursor
GLGDVDQLVK	1043.57	NP_001277842.1	lipoprotein lipase precursor
DIESKFALR	1078.59	NP_001277842.1	lipoprotein lipase precursor
DRITGGKDFRD	1279.64	NP_001277842.1	lipoprotein lipase precursor
AVSEHQLLHDKGKSIQDLR	2174.17	NP_001277878.1	parathyroid hormone-related protein precursor [Bubalus bubalis]
IIVTQTMK	933.544	NP_001277893.1	beta-lactoglobulin precursor [Bubalus bubalis]	lgb
IIVTQTMKGLDIQK	1587.91	NP_001277893.1	beta-lactoglobulin precursor [Bubalus bubalis]	lgb
IVTQTMKGLDIQK	1474.83	NP_001277893.1	beta-lactoglobulin precursor [Bubalus bubalis]	lgb
LINNQFLPYPYYAKPAAVR	2238.21	NP_001277901.1	Kappa-casein	CSN3
LSRYPSYGLNYYQQKPVALINNQFLPYPYYAKPAAVR	4366.28	NP_001277901.1	Kappa-casein	CSN3
INNQFLPYPYYAKPAAVR	2125.12	NP_001277901.1	Kappa-casein	CSN3
SRYPSYGLNYYQQKPVALINNQFLPYPYYAKPAAVR	4253.2	NP_001277901.1	Kappa-casein	CSN3
NNQFLPYPYYAKPAAVR	2012.04	NP_001277901.1	Kappa-casein	CSN3
YQQKPVALINNQFLPYPYYAKPAAVR	3052.64	NP_001277901.1	Kappa-casein	CSN3
YPSYGLNYYQQKPVALINNQFLPYPYYAKPAAVR	4010.06	NP_001277901.1	Kappa-casein	CSN3
LPYPYYAKPAAVR	1508.83	NP_001277901.1	Kappa-casein	CSN3
FLPYPYYAKPAAVR	1655.89	NP_001277901.1	Kappa-casein	CSN3
LSRYPSYGLNYYQQKPVALINNQFLPYPYYAKPA	4040.07	NP_001277901.1	Kappa-casein	CSN3
NQFLPYPYYAKPAAVR	1898	NP_001277901.1	Kappa-casein	CSN3
LSRYPSYGLNYYQQKPVALINNQFLPYPYYAKPAA	4111.11	NP_001277901.1	Kappa-casein	CSN3
IAKYIPIQYVLSRYPSYGLNYYQQKPVA	3335.78	NP_001277901.1	Kappa-casein	CSN3
VPIDIDKTKVK	1255.76	XP_006041251.1	nucleobindin-2
TPKQPAPKPEPSYSEYASVQVQR	2587.32	XP_006042105.2	tyrosine-protein phosphatase non-receptor type substrate 1 isoform X
YPDAVATWLKPDPSQK	1815.93	XP_006042334.2	Osteopontin	OPN
LPVKPTSSGSSEEK	1445.75	XP_006042334.2	Osteopontin	OPN
LPVKPTSSGSSEEKQLNNKYPDAVATWLKPDPSQ	3711.89	XP_006042334.2	Osteopontin	OPN
YPDAVATWLKPDPSQ	1687.83	XP_006042334.2	Osteopontin	OPN
FTPFIPTESTNDGRGDSVAYGLKSRSKKF	3205.63	XP_006042334.2	Osteopontin	OPN
AVATWLKPDPSQK	1440.78	XP_006042334.2	Osteopontin	OPN
NKYPDAVATWLKPDPSQK	2058.07	XP_006042334.2	Osteopontin	OPN
FTPFIPTESTNDGRGDSVAYGLK	2472.2	XP_006042334.2	Osteopontin	OPN
FIPTESTNDGRGDS	1495.67	XP_006042334.2	Osteopontin	OPN
NKYPDAVATWLKPDPSQ	1929.97	XP_006042334.2	Osteopontin	OPN
SNVQSPDATEEDFTSHIESEEMH	2619.08	XP_006042334.2	Osteopontin	OPN
SQTVKEDPMATDSVYAASQMPSRSLL	2812.35	XP_006042431.1	cyclic AMP-responsive element-binding protein 3-like protein 1 isoform X1
ALLDPSFFEKESEKDAAGGPGAPADPGRPTGYSGSSKA	3764.8	XP_006043871.1	polymeric immunoglobulin receptor	PIGR
AGEIQNKALLDPSFFEKESEKD	2495.23	XP_006043871.1	polymeric immunoglobulin receptor	PIGR
AGEIQNKALLDPSFFEKESEKDAAGGPGAPADPGRPTGYSGSSKA	4505.19	XP_006043871.1	polymeric immunoglobulin receptor	PIGR
PSFFEKESEKDAAGGPGAPADPGRPTGYSGSSKA	3352.57	XP_006043871.1	polymeric immunoglobulin receptor	PIGR
AAPAGAAIQSRAGEIQN	1624.84	XP_006043871.1	polymeric immunoglobulin receptor	PIGR
AAPAGAAIQSRAGEIQNK	1752.94	XP_006043871.1	polymeric immunoglobulin receptor	PIGR
ALLDPSFFEKESEKD	1754.85	XP_006043871.1	polymeric immunoglobulin receptor	PIGR
FFEKESEKDAAGGPGAPADPGRPTGYSGSSKA	3168.49	XP_006043871.1	polymeric immunoglobulin receptor	PIGR
SPIFGPEEVTSVEGR	1603.8	XP_006043871.1	polymeric immunoglobulin receptor	PIGR
AAPAGAAIQSR	1012.55	XP_006043871.1	polymeric immunoglobulin receptor	PIGR
APAGAAIQSRAGEIQ	1439.76	XP_006043871.1	polymeric immunoglobulin receptor	PIGR
SEETKENERFTVR	1624.79	XP_006045164.2	complement C3
LSLNEEEIR	1102.57	XP_006045715.2	syntenin-1
DTGAVLLAEFLAGRNLPGGPSELGRVG	2666.43	XP_006048651.2	sulfhydryl oxidase 1 isoform X1
SKSYYDILGVPKSASERQVK	2255.2	XP_006050765.1	DnaJ heat shock protein family (Hsp40) member B9	DNAJB9
FADLSTTLK	995.541	XP_006050774.1	cysteine-rich secretory protein 3	LOC102394104
NVQTEIVNKHNDLRRG	1893	XP_006050774.1	cysteine-rich secretory protein 3	LOC102394104
NVQTEIVNKHNDLR	1679.88	XP_006050774.1	cysteine-rich secretory protein 3	LOC102394104
FADLSTTLKNVQTEIVNKHNDLR	2656.41	XP_006050774.1	cysteine-rich secretory protein 3	LOC102394104
SLIGNPDKSPVVTGR	1539.85	XP_006051131.2	proteinase-activated receptor 2
MGPGTSGSGVSTATVPR	1561.76	XP_006053696.2	LOW QUALITY PROTEIN: sodium/glucose cotransporter 4
ADESLALGKPGKEPR	1567.84	XP_006055021.1	fibroblast growth factor-binding protein 1	LOC102403105
YEGLSYDVDSLHQKHQRA	2146.03	XP_006056808.1	disintegrin and metalloproteinase domain-containing protein 10
EGLSYDVDSLHQKHQRA	1982.97	XP_006056808.1	disintegrin and metalloproteinase domain-containing protein 10
GLSYDVDSLHQKHQRA	1853.93	XP_006056808.1	disintegrin and metalloproteinase domain-containing protein 10
SPTFKSFEEKVENLK	1782.93	XP_006057110.1	tumor protein D52 isoform X1
SVITKKLEDVK	1259.76	XP_006057110.1	tumor protein D52 isoform X1
SASEDIDFDDLSR	1469.64	XP_006060446.1	IST1 homolog isoform X1
ASEDIDFDDLSR	1382.61	XP_006060446.1	IST1 homolog isoform X1
SEDIDFDDLSR	1311.57	XP_006060446.1	IST1 homolog isoform X1
DEAVKPLGL	941.53	XP_006061855.2	LOW QUALITY PROTEIN: fatty acid synthase
GVSGALALLQGARG	1269.73	XP_006062764.1	monocyte differentiation antigen CD14 isoform X1
GADTNPKQYADTIKALRVR	2117.15	XP_006062764.1	monocyte differentiation antigen CD14 isoform X1
GADTNPKQYADTIKALRV	1961.05	XP_006062764.1	monocyte differentiation antigen CD14 isoform X1
YVGTLHENRQGSSVQAQIR	2143.1	XP_006063039.1	receptor-type tyrosine-protein phosphatase gamma isoform X3
ILNEPEDETHLEAQPTDASAQFIRNLQISNEDLSKEPSISREDLISKEQIVIR	6059.08	XP_006063747.1	Glycosylation-dependent cell adhesion molecule 1	Glycam1
ILNEPEDETHLEAQPTDASAQFIR	2724.31	XP_006063747.1	Glycosylation-dependent cell adhesion molecule 2	Glycam1
NLQISNEDLSKEPSISREDLISKEQIVIR	3353.79	XP_006063747.1	Glycosylation-dependent cell adhesion molecule 3	Glycam1
ILNEPEDETHLEAQPTDASAQFIRNLQISNEDLSKEPSISR	4635.28	XP_006063747.1	Glycosylation-dependent cell adhesion molecule 4	Glycam1
ISNEDLSKEPSISREDLISKEQIVIR	2998.61	XP_006063747.1	Glycosylation-dependent cell adhesion molecule 5	Glycam1
SRQPQNQNPKLPLSILKEKHL	2468.41	XP_006063747.1	Glycosylation-dependent cell adhesion molecule 6	Glycam1
SSRQPQNQNPKLPLSILKEKHL	2555.44	XP_006063747.1	Glycosylation-dependent cell adhesion molecule 7	Glycam1
LNEPEDETHLEAQPTDASAQFIR	2611.23	XP_006063747.1	Glycosylation-dependent cell adhesion molecule 8	Glycam1
NAALGSEETTEHTPSDASTTEGKLMELGHK	3141.46	XP_006063747.1	Glycosylation-dependent cell adhesion molecule 9	Glycam1
NAALGSEETTEHTPSDASTTEGK	2333.04	XP_006063747.1	Glycosylation-dependent cell adhesion molecule 10	Glycam1
SSRQPQNQNPKLPLSILKEKH	2442.36	XP_006063747.1	Glycosylation-dependent cell adhesion molecule 11	Glycam1
NQNPKLPLSILKEKHL	1872.11	XP_006063747.1	Glycosylation-dependent cell adhesion molecule 12	Glycam1
LPLSILKEKHL	1290.81	XP_006063747.1	Glycosylation-dependent cell adhesion molecule 13	Glycam1
ILNEPEDETHLEAQPTDASAQFIRNLQISNEDLSKEPSISRED	4879.35	XP_006063747.1	Glycosylation-dependent cell adhesion molecule 14	Glycam1
DETHLEAQPTDASAQFIR	2028.96	XP_006063747.1	Glycosylation-dependent cell adhesion molecule 15	Glycam1
NPKLPLSILKEKHL	1630.01	XP_006063747.1	Glycosylation-dependent cell adhesion molecule 16	Glycam1
SSRQPQNQNPKLPLSILK	2048.16	XP_006063747.1	Glycosylation-dependent cell adhesion molecule 17	Glycam1
ILNEPEDETHLEAQPTDASAQFIRNLQ	3079.5	XP_006063747.1	Glycosylation-dependent cell adhesion molecule 18	Glycam1
KEPSISREDLISKEQIVIR	2240.26	XP_006063747.1	Glycosylation-dependent cell adhesion molecule 19	Glycam1
ILNEPEDETHLEAQPTDASAQFIRNL	2951.44	XP_006063747.1	Glycosylation-dependent cell adhesion molecule 20	Glycam1
IRNLQISNEDLSKEPSISREDLISKEQIVIR	3622.98	XP_006063747.1	Glycosylation-dependent cell adhesion molecule 21	Glycam1
LQISNEDLSKEPSISREDLISKEQIVIR	3239.75	XP_006063747.1	Glycosylation-dependent cell adhesion molecule 22	Glycam1
SSRQPQNQNPKLPLSILKEK	2305.3	XP_006063747.1	Glycosylation-dependent cell adhesion molecule 23	Glycam1
ETHLEAQPTDASAQFIR	1913.94	XP_006063747.1	Glycosylation-dependent cell adhesion molecule 24	Glycam1
LSKEPSISREDLISKEQIVIR	2440.38	XP_006063747.1	Glycosylation-dependent cell adhesion molecule 25	Glycam1
ASAQFIRNLQISNEDLSKEPSISREDLISKEQIVIR	4127.21	XP_006063747.1	Glycosylation-dependent cell adhesion molecule 26	Glycam1
EDLISKEQIVIR	1442.82	XP_006063747.1	Glycosylation-dependent cell adhesion molecule 27	Glycam1
ILNEPEDETHLEAQPTDASAQFIRN	2838.35	XP_006063747.1	Glycosylation-dependent cell adhesion molecule 28	Glycam1
DLISKEQIVIR	1313.78	XP_006063747.1	Glycosylation-dependent cell adhesion molecule 29	Glycam1
LAILNEPEDETHLEAQPTDASAQFIR	2908.43	XP_006063747.1	Glycosylation-dependent cell adhesion molecule 30	Glycam1
LISKEQIVIR	1198.75	XP_006063747.1	Glycosylation-dependent cell adhesion molecule 31	Glycam1
LPLSILKEKH	1177.73	XP_006063747.1	Glycosylation-dependent cell adhesion molecule 32	Glycam1
EPSISREDLISKEQIVIR	2112.17	XP_006063747.1	Glycosylation-dependent cell adhesion molecule 33	Glycam1
EPEDETHLEAQPTDASAQFIR	2384.1	XP_006063747.1	Glycosylation-dependent cell adhesion molecule 34	Glycam1
LEAQPTDASAQFIR	1546.79	XP_006063747.1	Glycosylation-dependent cell adhesion molecule 35	Glycam1
ILNEPEDETH	1196.54	XP_006063747.1	Glycosylation-dependent cell adhesion molecule 36	Glycam1
SKEPSISREDLISKEQIVIR	2327.29	XP_006063747.1	Glycosylation-dependent cell adhesion molecule 37	Glycam1
EAQPTDASAQFIR	1433.7	XP_006063747.1	Glycosylation-dependent cell adhesion molecule 38	Glycam1
EDETHLEAQPTDASAQFIR	2158	XP_006063747.1	Glycosylation-dependent cell adhesion molecule 39	Glycam1
LPLSILKEK	1040.67	XP_006063747.1	Glycosylation-dependent cell adhesion molecule 40	Glycam1
NEPEDETHLEAQPTDASAQFIR	2498.14	XP_006063747.1	Glycosylation-dependent cell adhesion molecule 41	Glycam1
HLEAQPTDASAQFIR	1683.84	XP_006063747.1	Glycosylation-dependent cell adhesion molecule 42	Glycam1
LEAQPTDASAQFIRN	1660.83	XP_006063747.1	Glycosylation-dependent cell adhesion molecule 43	Glycam1
REDLISKEQIVIR	1598.92	XP_006063747.1	Glycosylation-dependent cell adhesion molecule 44	Glycam1
LNEPEDETH	1083.46	XP_006063747.1	Glycosylation-dependent cell adhesion molecule 45	Glycam1
PEDETHLEAQPTDASAQFIR	2255.06	XP_006063747.1	Glycosylation-dependent cell adhesion molecule 46	Glycam1
ILNEPEDETHLEAQPTDASAQFIRNLQIS	3279.61	XP_006063747.1	Glycosylation-dependent cell adhesion molecule 1	Glycam1
AQPTDASAQFIR	1304.66	XP_006063747.1	Glycosylation-dependent cell adhesion molecule 2	Glycam1
THLEAQPTDASAQFIR	1784.89	XP_006063747.1	Glycosylation-dependent cell adhesion molecule 3	Glycam1
EDLISKEQIVIRSS	1616.89	XP_006063747.1	Glycosylation-dependent cell adhesion molecule 4	Glycam1
AQPTDASAQFIRN	1418.7	XP_006063747.1	Glycosylation-dependent cell adhesion molecule 5	Glycam1
ILNEPEDETHLEAQPTDASAQFIRNLQISNEDLSKEPSISREDLIS	5192.55	XP_006063747.1	Glycosylation-dependent cell adhesion molecule 6	Glycam1
SREDLISKEQIVIR	1685.95	XP_006063747.1	Glycosylation-dependent cell adhesion molecule 7	Glycam1
ISREDLISKEQIVIR	1799.04	XP_006063747.1	Glycosylation-dependent cell adhesion molecule 8	Glycam1
SISREDLISKEQIVIR	1886.07	XP_006063747.1	Glycosylation-dependent cell adhesion molecule 9	Glycam1
ILNEPEDETHLE	1438.67	XP_006063747.1	Glycosylation-dependent cell adhesion molecule 10	Glycam1
ILNEPEDETHL	1309.63	XP_006063747.1	Glycosylation-dependent cell adhesion molecule 11	Glycam1
QPQNQNPKLPLS	1363.73	XP_006063747.1	Glycosylation-dependent cell adhesion molecule 12	Glycam1
ASAQFIRNL	1019.56	XP_006063747.1	Glycosylation-dependent cell adhesion molecule 13	Glycam1
GRIFLTGEKANSVLKRYPR	2205.26	XP_006066488.1	transmembrane gamma-carboxyglutamic acid protein 1 isoform X1
RLPQLVGVHTPLQGSSHGAAAIGQPSGELR	3033.63	XP_006066766.1	beta-1,4-galactosyltransferase 1
VYYLAGRDLRRLPQLVGVHTPLQGSSHGAAAIGQPSGELRLR	4509.47	XP_006066766.1	beta-1,4-galactosyltransferase 1
VYYLAGRDLRRLPQLVGVHTPLQGSSHGAAAIGQPSGELR	4240.29	XP_006066766.1	beta-1,4-galactosyltransferase 1
RLPQLVGVHTPLQGSSHGAAAIGQPSGELRL	3146.72	XP_006066766.1	beta-1,4-galactosyltransferase 1
RLPQLVGVHTPLQGSSHGAAAIGQPSGELRLR	3302.82	XP_006066766.1	beta-1,4-galactosyltransferase 1
VYYLAGRDLRRLPQLVGVHTPLQGSSHGAAAIGQPSGELRL	4353.37	XP_006066766.1	beta-1,4-galactosyltransferase 1
GEDDDIYNRL	1209.54	XP_006066766.1	beta-1,4-galactosyltransferase 1
DTVASRVTEAVDVTR	1618.84	XP_006067188.2	perilipin-3 isoform X1
SAKDTVASRVTEAVDVTR	1905	XP_006067188.2	perilipin-3 isoform X1
DMEGELGPEEPLTPQQPR	2022.94	XP_006067602.1	apolipoprotein E
ATIGGVAWIGGKSLEVTK	1787.01	XP_006069634.1	transmembrane protein 263
HSVSVPAGSSLEDVLKNAQEHGRF	2564.29	XP_006069866.2	transcobalamin-2 isoform X1
EAKKVEGFDMVQKPSYYVRLG	2444.26	XP_006070958.1	perilipin 2	PLIN2
AYISTKDQYPYLK	1589.82	XP_006070958.1	perilipin 2	PLIN2
STITGVVDRTKGAVTGSVEKTK	2234.24	XP_006070958.1	perilipin 2	PLIN2
GAKDSVASTITGVVDRTKGAVTGSVEKTK	2862.55	XP_006070958.1	perilipin 2	PLIN2
YLPLTKDELEK	1348.74	XP_006070958.1	perilipin 2	PLIN2
AKDSVASTITGVVDRTKGAVTG	2133.15	XP_006070958.1	perilipin 2	PLIN2
LPLTKDELEKEAKKVEGFDMVQKPSYYVRLG	3610.92	XP_006070958.1	perilipin 2	PLIN2
DLVSSAYISTKDQYPYLK	2091.06	XP_006070958.1	perilipin 2	PLIN2
LPLTKDELEK	1185.67	XP_006070958.1	perilipin 2	PLIN2
GAKDSVASTITGVVDRTKGAVTG	2190.17	XP_006070958.1	perilipin 2	PLIN2
STITGVVDRTKGAVTG	1561.85	XP_006070958.1	perilipin 2	PLIN2
YLPLTKDELEKEAKKVEGFDMVQKPSYYVRLG	3773.98	XP_006070958.1	perilipin 2	PLIN2
ISTKDQYPYLK	1355.72	XP_006070958.1	perilipin 2	PLIN2
STYDLVSSAYISTKDQYPYLK	2442.21	XP_006070958.1	perilipin 2	PLIN2
YISTKDQYPYLK	1518.78	XP_006070958.1	perilipin 2	PLIN2
VEPQLSVVTR	1127.64	XP_006070958.1	perilipin 2	PLIN2
SGVENALTK	918.489	XP_006070958.1	perilipin 2	PLIN2
SINTVLGSRVMQ	1304.7	XP_006070958.1	perilipin 2	PLIN2
AKDSVASTITGVVDRTKGAVTGSVEKTK	2805.53	XP_006070958.1	perilipin 2	PLIN2
SINTVLGSRVM	1176.64	XP_006070958.1	perilipin 2	PLIN2
DELEKEAKKVEGFDMVQKPSYYVRLG	3058.56	XP_006070958.1	perilipin 2	PLIN2
SELLVDQYLPLTKDELEK	2133.13	XP_006070958.1	perilipin 2	PLIN2
DSVASTITGVVDRTKGAVTG	1934.02	XP_006070958.1	perilipin 2	PLIN2
SAYISTKDQYPYLK	1676.85	XP_006070958.1	perilipin 2	PLIN2
VQKPSYYVRLG	1309.73	XP_006070958.1	perilipin 2	PLIN2
DLVSSAYISTK	1183.62	XP_006070958.1	perilipin 2	PLIN2
EPQLSVVTR	1028.57	XP_006070958.1	perilipin 2	PLIN2
DSVASTITGVVDR	1319.68	XP_006070958.1	perilipin 2	PLIN2
EEAKQKGQETISQLH	1725.88	XP_006070958.1	perilipin 2	PLIN2
QPTNQVVANAKGAMTG	1586.8	XP_006070958.1	perilipin 2	PLIN2
VVDRTKGAVTGSVEKTK	1775	XP_006070958.1	perilipin 2	PLIN2
SIQGLPQNIQDR	1368.72	XP_006070958.1	perilipin 2	PLIN2
SSGVENALTK	1005.52	XP_006070958.1	perilipin 2	PLIN2
EAKKVEGFDMVQKPSYYVR	2274.16	XP_006070958.1	perilipin 2	PLIN2
GAKDSVASTITGVVDR	1575.83	XP_006070958.1	perilipin 2	PLIN2
STYDLVSSAYISTK	1534.76	XP_006070958.1	perilipin 2	PLIN2
SELLVDQYLPLTK	1518.84	XP_006070958.1	perilipin 2	PLIN2
RELEELNVPGEIVESLSSSEESITHINK	3138.58	XP_006071186.1	casein beta	CSN2
EELNVPGEIVESLSSSEESITHINKKIEK	3238.67	XP_006071186.1	casein beta	CSN2
LVYPFPGPIPKSLPQNIPPLTQTPVVVPPFLQPEIMGVSKVK	4562.59	XP_006071186.1	casein beta	CSN2
KIEKFQSEEQQQMEDELQDKIHPFAQTQSLVYPFPGPIPK	4728.37	XP_006071186.1	casein beta	CSN2
RELEELNVPGEIVESLSSSEESITHINKKIEK	3636.9	XP_006071186.1	casein beta	CSN2
IEKFQSEEQQQMEDELQDKIHPFAQTQ	3304.54	XP_006071186.1	casein beta	CSN2
EELNVPGEIVESLSSSEESITHINK	2740.35	XP_006071186.1	casein beta	CSN2
SLVYPFPGPIPKSLPQNIPPLTQTPVVVPPFLQPEIMGVSKVK	4649.62	XP_006071186.1	casein beta	CSN2
FQSEEQQQMEDELQDKIHPFAQTQSLVYPFPGPIPK	4230.05	XP_006071186.1	casein beta	CSN2
IEKFQSEEQQQMEDELQDK	2382.08	XP_006071186.1	casein beta	CSN2
KIEKFQSEEQQQMEDELQDK	2510.17	XP_006071186.1	casein beta	CSN2
ELQDKIHPFAQTQSLVYPFPGPIPK	2850.52	XP_006071186.1	casein beta	CSN2
IHPFAQTQSLVYPFPGPIPK	2237.21	XP_006071186.1	casein beta	CSN2
KIHPFAQTQSLVYPFPGPIPK	2365.31	XP_006071186.1	casein beta	CSN2
SEEQQQMEDELQDKIHPFAQTQSLVYPFPGPIPK	3954.92	XP_006071186.1	casein beta	CSN2
IEKFQSEEQQQMEDELQDKIHPFAQTQSLVYPFPGPIPK	4600.27	XP_006071186.1	casein beta	CSN2
EEQQQMEDELQDKIHPFAQTQSLVYPFPGPIPK	3867.89	XP_006071186.1	casein beta	CSN2
AQTQSLVYPFPGPIPK	1742.95	XP_006071186.1	casein beta	CSN2
FQSEEQQQMEDELQDK	2011.85	XP_006071186.1	casein beta	CSN2
EQQQMEDELQDKIHPFAQTQSLVYPFPGPIPK	3738.85	XP_006071186.1	casein beta	CSN2
KFQSEEQQQMEDELQDKIHPFAQTQSLVYPFPGPIPK	4358.14	XP_006071186.1	casein beta	CSN2
QTQSLVYPFPGPIPK	1671.91	XP_006071186.1	casein beta	CSN2
RELEELNVPGEIVESLSSSEESITH	2783.36	XP_006071186.1	casein beta	CSN2
TQSLVYPFPGPIPK	1543.85	XP_006071186.1	casein beta	CSN2
LVYPFPGPIPKSLPQNIPPLTQTPVVVPPFLQPEIMGVSKVKE	4691.63	XP_006071186.1	casein beta	CSN2
DELQDKIHPFAQTQSLVYPFPGPIPK	2965.55	XP_006071186.1	casein beta	CSN2
MEDELQDKIHPFAQTQSLVYPFPGPIPK	3225.63	XP_006071186.1	casein beta	CSN2
FAQTQSLVYPFPGPIPK	1890.02	XP_006071186.1	casein beta	CSN2
SLVYPFPGPIPK	1314.75	XP_006071186.1	casein beta	CSN2
HPFAQTQSLVYPFPGPIPK	2124.13	XP_006071186.1	casein beta	CSN2
KFQSEEQQQMEDELQDK	2139.95	XP_006071186.1	casein beta	CSN2
SLVYPFPGPIPKSLPQNIPPLTQTPVVVPPFLQPEIMGVSKVKE	4778.66	XP_006071186.1	casein beta	CSN2
EDELQDKIHPFAQTQSLVYPFPGPIPK	3094.59	XP_006071186.1	casein beta	CSN2
QSLVYPFPGPIPK	1442.8	XP_006071186.1	casein beta	CSN2
NVPGEIVESLSSSEESITHINK	2369.18	XP_006071186.1	casein beta	CSN2
LVYPFPGPIPK	1227.71	XP_006071186.1	casein beta	CSN2
KIEKFQSEEQQQMEDELQDKIHPFAQTQ	3432.64	XP_006071186.1	casein beta	CSN2
PFAQTQSLVYPFPGPIPK	1987.07	XP_006071186.1	casein beta	CSN2
FQSEEQQQMEDELQDKIHP	2359.05	XP_006071186.1	casein beta	CSN2
EELNVPGEIVESLSSSEESITHIN	2612.26	XP_006071186.1	casein beta	CSN2
QSEEQQQMEDELQDK	1864.79	XP_006071186.1	casein beta	CSN2
QQQMEDELQDKIHPFAQTQSLVYPFPGPIPK	3609.8	XP_006071186.1	casein beta	CSN2
DKIHPFAQTQSLVYPFPGPIPK	2480.33	XP_006071186.1	casein beta	CSN2
LQDKIHPFAQTQSLVYPFPGPIPK	2721.48	XP_006071186.1	casein beta	CSN2
KIEKFQSEEQQQMEDELQDKIHP	2857.37	XP_006071186.1	casein beta	CSN2
KIEKFQSEEQQQMEDELQDKIHPFA	3075.47	XP_006071186.1	casein beta	CSN2
VYPFPGPIPK	1114.63	XP_006071186.1	casein beta	CSN2
QMEDELQDKIHPFAQTQSLVYPFPGPIPK	3353.69	XP_006071186.1	casein beta	CSN2
YPFPGPIPK	1015.56	XP_006071186.1	casein beta	CSN2
EEQQQMEDELQDK	1649.7	XP_006071186.1	casein beta	CSN2
LEELNVPGEIVESLSSSEESITH	2498.21	XP_006071186.1	casein beta	CSN2
FQSEEQQQMEDELQDKIHPFAQTQ	2934.32	XP_006071186.1	casein beta	CSN2
MEDELQDK	1007.43	XP_006071186.1	casein beta	CSN2
FQSEEQQQMEDELQDKIHPF	2506.12	XP_006071186.1	casein beta	CSN2
FQSEEQQQMEDELQDKIHPFAQTQS	3021.35	XP_006071186.1	casein beta	CSN2
FQSEEQQQMEDELQDKIHPFAQTQSLVYPFPGPIP	4101.95	XP_006071186.1	casein beta	CSN2
SLPQNIPPLTQTPVVVPPFLQPEIMGVSKVKEAMAPKHKEMPFPK	4975.7	XP_006071186.1;NP_001277808.1	casein beta	CSN2
SLPQNIPPLTQTPVVVPPFLQPEIMGVSKVKEAMAPKHK	4246.35	XP_006071186.1;NP_001277808.1	casein beta	CSN2
SLPQNIPPLTQTPVVVPPFLQPEIMGVSKVKEAMAPK	3981.2	XP_006071186.1;NP_001277808.1	casein beta	CSN2
SLPQNIPPLTQTPVVVPPFLQPEIMGVSKVKEAMAPKH	4118.25	XP_006071186.1;NP_001277808.1	casein beta	CSN2
SLPQNIPPLTQTPVVVPPFLQPEIMGVSKVK	3353.89	XP_006071186.1;NP_001277808.1	casein beta	CSN2
PPLTQTPVVVPPFLQPEIMGVSKVKEAMAPKHK	3594	XP_006071186.1;NP_001277808.1	casein beta	CSN2
LTQTPVVVPPFLQPEIMGVSKVKEAMAPK	3134.74	XP_006071186.1;NP_001277808.1	casein beta	CSN2
SLPQNIPPLTQTPVVVPPFLQPEIMGVSKVKE	3482.93	XP_006071186.1;NP_001277808.1	casein beta	CSN2
LTQTPVVVPPFLQPEIMGVSKVKEAMAPKH	3271.79	XP_006071186.1;NP_001277808.1	casein beta	CSN2
IPPLTQTPVVVPPFLQPEIMGVSKVKEAMAPK	3441.93	XP_006071186.1;NP_001277808.1	casein beta	CSN2
SLPQNIPPLTQTPVVVPPFLQPEIMGVSK	3126.73	XP_006071186.1;NP_001277808.1	casein beta	CSN2
LPQNIPPLTQTPVVVPPFLQPEIMGVSKVKEAMAPKH	4031.22	XP_006071186.1;NP_001277808.1	casein beta	CSN2
VVPPFLQPEIMGVSKVKEAMAPK	2495.38	XP_006071186.1;NP_001277808.1	casein beta	CSN2
TPVVVPPFLQPEIMGVSKVKEAMAPK	2792.55	XP_006071186.1;NP_001277808.1	casein beta	CSN2
LLYQEPVLGPVRGPFPIIV	2107.23	XP_006071186.1;NP_001277808.1	casein beta	CSN2
YQEPVLGPVRGPFPI	1668.91	XP_006071186.1;NP_001277808.1	casein beta	CSN2
LPQNIPPLTQTPVVVPPFLQPEIMGVSKVKEAMAPK	3894.16	XP_006071186.1;NP_001277808.1	casein beta	CSN2
LLQSWMHQPPQPLPPTVMFPPQSVLSLSQSKVLPVPQK	4260.31	XP_006071186.1;NP_001277808.1	casein beta	CSN2
VKEAMAPKHKEMPFPK	1867.99	XP_006071186.1;NP_001277808.1	casein beta	CSN2
SLPQNIPPLTQTPVVVPPFLQPEIMGVSKVKEA	3553.97	XP_006071186.1;NP_001277808.1	casein beta	CSN2
YQEPVLGPVRGPFPII	1781.99	XP_006071186.1;NP_001277808.1	casein beta	CSN2
VLPVPQKAVPYPQRD	1706.96	XP_006071186.1;NP_001277808.1	casein beta	CSN2
AVPYPQRDMPIQAFLLYQEPVLGPVRGPFP	3395.8	XP_006071186.1;NP_001277808.1	casein beta	CSN2
YQEPVLGPVRGPFP	1555.83	XP_006071186.1;NP_001277808.1	casein beta	CSN2
SLPQNIPPLTQTPVVVPPFLQPEIMGVSKV	3225.8	XP_006071186.1;NP_001277808.1	casein beta	CSN2
NIPPLTQTPVVVPPFLQPEIMGVSKVKEAMAPK	3555.97	XP_006071186.1;NP_001277808.1	casein beta	CSN2
EPVLGPVRGPFP	1264.7	XP_006071186.1;NP_001277808.1	casein beta	CSN2
VLPVPQKAVPYPQR	1591.93	XP_006071186.1;NP_001277808.1	casein beta	CSN2
LTQTPVVVPPFLQPEIMGVSKVKE	2636.47	XP_006071186.1;NP_001277808.1	casein beta	CSN2
PPFLQPEIMGVSKVKEAMAPKHK	2562.39	XP_006071186.1;NP_001277808.1	casein beta	CSN2
YQEPVLGPVRGPFPIIV	1881.06	XP_006071186.1;NP_001277808.1	casein beta	CSN2
SQSKVLPVPQKAVPYPQRD	2137.18	XP_006071186.1;NP_001277808.1	casein beta	CSN2
LSSSEESITHINK	1444.73	XP_006071186.1;NP_001277808.1	casein beta	CSN2
EPVLGPVRGPFPI	1377.79	XP_006071186.1;NP_001277808.1	casein beta	CSN2
VSKVKEAMAPK	1187.68	XP_006071186.1;NP_001277808.1	casein beta	CSN2
IMGVSKVKEAMAPK	1488.83	XP_006071186.1;NP_001277808.1	casein beta	CSN2
IVESLSSSEESITH	1517.73	XP_006071186.1;NP_001277808.1	casein beta	CSN2
EPVLGPVRGPFPII	1490.87	XP_006071186.1;NP_001277808.1	casein beta	CSN2
LYQEPVLGPVRGPFP	1668.91	XP_006071186.1;NP_001277808.1	casein beta	CSN2
LLYQEPVLGPVRGPFPII	2008.16	XP_006071186.1;NP_001277808.1	casein beta	CSN2
LLYQEPVLGPVRGPFP	1781.99	XP_006071186.1;NP_001277808.1	casein beta	CSN2
LLQSWMHQPPQPLPPTVMFPPQSVLSLSQSK	3498.83	XP_006071186.1;NP_001277808.1	casein beta	CSN2
VVPPFLQPEIMGVSKVKEAMAPKH	2632.44	XP_006071186.1;NP_001277808.1	casein beta	CSN2
VPPFLQPEIMGVSKVKEAMAPKH	2533.37	XP_006071186.1;NP_001277808.1	casein beta	CSN2
EPVLGPVRGPF	1167.65	XP_006071186.1;NP_001277808.1	casein beta	CSN2
QEPVLGPVRGPFPII	1618.93	XP_006071186.1;NP_001277808.1	casein beta	CSN2
VLPVPQKAVPYPQRDMPIQAFLLYQEPVLGPVR	3759.08	XP_006071186.1;NP_001277808.1	casein beta	CSN2
EPVLGPVRGPFPIIV	1589.94	XP_006071186.1;NP_001277808.1	casein beta	CSN2
TQTPVVVPPFLQPEIMGVSKVKEAMAPK	3021.65	XP_006071186.1;NP_001277808.1	casein beta	CSN2
FLLYQEPVLGPVRGPFPIIV	2254.3	XP_006071186.1;NP_001277808.1	casein beta	CSN2
VLSLSQSKVLPVPQKAVPYPQRD	2549.44	XP_006071186.1;NP_001277808.1	casein beta	CSN2
SLPQNIPPLTQTPVVVPPFLQPEIMGVSKVKEAM	3685.01	XP_006071186.1;NP_001277808.1	casein beta	CSN2
QEPVLGPVRGPFP	1392.76	XP_006071186.1;NP_001277808.1	casein beta	CSN2
LYQEPVLGPVR	1270.72	XP_006071186.1;NP_001277808.1	casein beta	CSN2
VPYPQRDMPIQ	1343.68	XP_006071186.1;NP_001277808.1	casein beta	CSN2
PVVVPPFLQPEIMGVSKVKEAMAPK	2691.5	XP_006071186.1;NP_001277808.1	casein beta	CSN2
YQEPVLGPVRGP	1311.71	XP_006071186.1;NP_001277808.1	casein beta	CSN2
VLPVPQKAVPYPQRDMPIQAF	2394.3	XP_006071186.1;NP_001277808.1	casein beta	CSN2
VLPVPQKAVPYPQRDMPIQA	2247.23	XP_006071186.1;NP_001277808.1	casein beta	CSN2
YQEPVLGPVR	1157.63	XP_006071186.1;NP_001277808.1	casein beta	CSN2
EPVLGPVRGP	1020.58	XP_006071186.1;NP_001277808.1	casein beta	CSN2
LSLSQSKVLPVPQKAVPYPQR	2335.35	XP_006071186.1;NP_001277808.1	casein beta	CSN2
LLYQEPVLGPVR	1383.8	XP_006071186.1;NP_001277808.1	casein beta	CSN2
VLPVPQKAVPYPQRDMP	1935.05	XP_006071186.1;NP_001277808.1	casein beta	CSN2
IVESLSSSEESITHINK	1872.95	XP_006071186.1;NP_001277808.1	casein beta	CSN2
VLSLSQSKVLPVPQK	1622.98	XP_006071186.1;NP_001277808.1	casein beta	CSN2
LYQEPVLGPVRGP	1424.79	XP_006071186.1;NP_001277808.1	casein beta	CSN2
PEIMGVSKVKEAMAPK	1714.92	XP_006071186.1;NP_001277808.1	casein beta	CSN2
KVLPVPQKAVPYPQRD	1835.05	XP_006071186.1;NP_001277808.1	casein beta	CSN2
VLGPVRGPFP	1038.61	XP_006071186.1;NP_001277808.1	casein beta	CSN2
QEPVLGPVRGPFPIIV	1718	XP_006071186.1;NP_001277808.1	casein beta	CSN2
LTQTPVVVPPFLQPEIMGVSKVK	2507.43	XP_006071186.1;NP_001277808.1	casein beta	CSN2
IPPLTQTPVVVPPFLQPEIMGVSKVKEAMAPKH	3578.98	XP_006071186.1;NP_001277808.1	casein beta	CSN2
LSSSEESITHIN	1316.63	XP_006071186.1;NP_001277808.1	casein beta	CSN2
LPVPQKAVPYPQRDMP	1835.98	XP_006071186.1;NP_001277808.1	casein beta	CSN2
LSQSKVLPVPQK	1323.8	XP_006071186.1;NP_001277808.1	casein beta	CSN2
STSAGGENVHDGIPMDDIPPLR	2278.08	XP_006072877.2	mucin-15
GGENVHDGIPMDDIPPLR	1931.93	XP_006072877.2	mucin-15
TSAGGENVHDGIPMDDIPPLR	2191.04	XP_006072877.2	mucin-15
LYDDRNEPVLR	1389.71	XP_006072877.2	mucin-15
IPMDDIPPLR	1166.62	XP_006072877.2	mucin-15
AGGENVHDGIPMDDIPPLR	2002.97	XP_006072877.2	mucin-15
YDDRNEPVLR	1276.63	XP_006072877.2	mucin-15
DGIPMDDIPPLR	1338.67	XP_006072877.2	mucin-15
GIPMDDIPPLR	1223.65	XP_006072877.2	mucin-15
SAGGENVHDGIPMDDIPPLR	2090	XP_006072877.2	mucin-15
YNPTANDSSTSAGGENVHDGIPMDDIPPLR	3140.42	XP_006072877.2	mucin-15
GTIPTAPPSYTGRHLW	1753.9	XP_006073988.1	G-protein coupled receptor family C group 5 member B
ESIRETEVIDPQDLLESR	2129.07	XP_006077692.1	syndecan-4
VGSLNLEELSEMR	1476.74	XP_006077971.1	protein OS-9 isoform X1
VLDLLPKLER	1195.74	XP_006078751.1	extracellular serine/threonine protein kinase FAM20C
AVRGEPGDSAAEEAAALTGEWR	2243.07	XP_025116432.1	cyclin and CBS domain divalent metal cation transport mediator 3
EKEGDQGPNIIPADIIFIVKEKLH	2703.47	XP_025122222.1	dnaJ homolog subfamily B member 13
SATEQEKEKDPFHYDYQTLRIGG	2712.29	XP_025122613.1	FXYD domain-containing ion transport regulator 6
SATEQEKEKDPFHYDYQTLR	2485.16	XP_025122613.1	FXYD domain-containing ion transport regulator 6
SATEQEKEKDPFHYDYQTLRIGGLV	2924.44	XP_025122613.1	FXYD domain-containing ion transport regulator 6
SATEQEKEKDPFHYDYQTLRIGGL	2825.37	XP_025122613.1	FXYD domain-containing ion transport regulator 6
DDPEAHSRPVTPLQLFDGRRN	2420.21	XP_025123371.1	complement C4-like
LPAPELGPRQARA	1375.78	XP_025125544.1	protein canopy homolog 3 isoform X4
LPAPELGPRQA	1148.64	XP_025125544.1	protein canopy homolog 3 isoform X4
LPAPELGPRQ	1077.61	XP_025125544.1	protein canopy homolog 3 isoform X4
LPAPELGPR	949.547	XP_025125544.1	protein canopy homolog 3 isoform X4
LDTSPSGKQGREVFLDSPEAQSFLGSR	2908.44	XP_025125795.1	transmembrane gamma-carboxyglutamic acid protein 2
SEGVAINPARVLDLGPITR	1978.11	XP_025130401.1	pancreatic secretory granule membrane major glycoprotein GP2	GP2
REGYNEPAADVPSER	1689.78	XP_025130975.1	E3 ubiquitin-protein ligase UBR3 isoform X1
DVAMVTGGLGRQLL	1429.78	XP_025132692.1	V-type proton ATPase subunit S1
DVAMVTGGLGRQ	1203.62	XP_025132692.1	V-type proton ATPase subunit S1
PDDKNAPFRQRPFCK	1818.91	XP_025133030.1	WD repeat-containing protein 44
APVNVTTEVK	1057.59	XP_025133680.1	elongation factor 1-alpha 1
EIITPWKLTRE	1385.78	XP_025134027.1	disintegrin and metalloproteinase domain-containing protein 9 isoform X1
GARSGFQQTSHLSSYEIITPWKLTRE	2992.53	XP_025134027.1	disintegrin and metalloproteinase domain-containing protein 9 isoform X1
APSELLRKF	1060.61	XP_025140391.1	dnaJ homolog subfamily C member 1
GMTRDQVREDSKADQFANEWGR	2596.2	XP_025142098.1	serum amyloid A3 protein	SAA3
DQVREDSKADQFANEWGR	2150.98	XP_025142098.1	serum amyloid A3 protein	SAA3
VPELMQNYGGH	1244.57	XP_025142925.1	interferon-induced transmembrane protein 3-like
IVQAVPELMQNYGGH	1655.82	XP_025142925.1	interferon-induced transmembrane protein 3-like
WSGPVGVSWGLRAAAPGGPAPR	2146.13	XP_025143934.1	sortilin 1	SORT1
SGPVGVSWGLR	1114.6	XP_025143934.1	sortilin 1	SORT1
WSGPVGVSWGLRAAAPGGPAPRGGRW	2602.35	XP_025143934.1	sortilin 1	SORT1
NAVPITPTLNREQLSTSEENSKKTVDMESTEVITK	3889.97	XP_025145301.1	Alpha-S2-casein	CASA2
KISQHYQKFTWPQYLKTVYQYQK	3005.57	XP_025145301.1	Alpha-S2-casein	CASA2
NAVPITPTLNREQLSTSEENSKKTVDMESTEVITKK	4018.06	XP_025145301.1	Alpha-S2-casein	CASA2
TVDMESTEVITK	1352.66	XP_025145301.1	Alpha-S2-casein	CASA2
VDMESTEVITK	1251.61	XP_025145301.1	Alpha-S2-casein	CASA2
KISQHYQKFTWPQYLKTVYQYQKAMKPWTQPK	4073.13	XP_025145301.1	Alpha-S2-casein	CASA2
ISQHYQKFTWPQYLKTVYQYQK	2877.47	XP_025145301.1	Alpha-S2-casein	CASA2
VDMESTEVITKK	1379.71	XP_025145301.1	Alpha-S2-casein	CASA2
TVDMESTEVITKK	1480.76	XP_025145301.1	Alpha-S2-casein	CASA2
KTVDMESTEVITK	1480.76	XP_025145301.1	Alpha-S2-casein	CASA2
MESTEVITK	1037.52	XP_025145301.1	Alpha-S2-casein	CASA2
KTVDMESTEVITKK	1608.85	XP_025145301.1	Alpha-S2-casein	CASA2
DMESTEVITK	1152.55	XP_025145301.1	Alpha-S2-casein	CASA2
AVPITPTLNREQLSTSEENSKKTVDMESTEVITK	3775.93	XP_025145301.1	Alpha-S2-casein	CASA2
RNAVPITPTLNREQLSTSEENSKKTVDMESTEVITK	4046.07	XP_025145301.1	Alpha-S2-casein	CASA2
ISQHYQKFTWPQYLKTVYQYQKAMKPWTQPK	3945.03	XP_025145301.1	Alpha-S2-casein	CASA2
NMAIHPSKEVIR	1394.76	XP_025145301.1	Alpha-S2-casein	CASA2
VDMESTEVITKKTK	1608.85	XP_025145301.1	Alpha-S2-casein	CASA2
LNREQLSTSEENSKKTVDMESTEVITK	3096.54	XP_025145301.1	Alpha-S2-casein	CASA2
KISQHYQKFTWPQYLK	2095.11	XP_025145301.1	Alpha-S2-casein	CASA2
TVYQYQKAMKPWTQPKTNVIPYVRYL	3215.71	XP_025145301.1;NP_001277794.1	Alpha-S2-casein	CASA2
KTKLTEEDKNRLNFL	1849.02	XP_025145301.1;NP_001277794.1	Alpha-S2-casein	CASA2
TKLTEEDKNRLNFL	1720.92	XP_025145301.1;NP_001277794.1	Alpha-S2-casein	CASA2
NAVPITPTLNREQLSTSEENSKK	2556.33	XP_025145301.1;NP_001277794.1	Alpha-S2-casein	CASA2
KTKLTEEDKNRLNFLK	1977.11	XP_025145301.1;NP_001277794.1	Alpha-S2-casein	CASA2
AMKPWTQPKTNVIPYVRYL	2305.25	XP_025145301.1;NP_001277794.1	Alpha-S2-casein	CASA2
KPWTQPKTNVIPYVRYL	2103.17	XP_025145301.1;NP_001277794.1	Alpha-S2-casein	CASA2
KHTMEHVSSSEESIISQETYKQEK	2835.35	XP_025145301.1;NP_001277794.1	Alpha-S2-casein	CASA2
KPWTQPKTNVIPYVR	1827.03	XP_025145301.1;NP_001277794.1	Alpha-S2-casein	CASA2
AMKPWTQPKTNVIPYVR	2029.11	XP_025145301.1;NP_001277794.1	Alpha-S2-casein	CASA2
NAVPITPTLNREQLSTSEENSKKT	2657.37	XP_025145301.1;NP_001277794.1	Alpha-S2-casein	CASA2
MEHVSSSEESIISQETYKQEK	2469.14	XP_025145301.1;NP_001277794.1	Alpha-S2-casein	CASA2
NAVPITPTLNREQLSTSEENSK	2428.23	XP_025145301.1;NP_001277794.1	Alpha-S2-casein	CASA2
YQGPIVLNPWDQVKR	1812.98	XP_025145301.1;NP_001277794.1	Alpha-S2-casein	CASA2
LTEEDKNRLNFLK	1619.88	XP_025145301.1;NP_001277794.1	Alpha-S2-casein	CASA2
TVYQYQKAMKPWTQPKTNVIPYVR	2939.56	XP_025145301.1;NP_001277794.1	Alpha-S2-casein	CASA2
TKLTEEDKNRLNFLK	1849.02	XP_025145301.1;NP_001277794.1	Alpha-S2-casein	CASA2
SEESIISQETYKQEK	1798.87	XP_025145301.1;NP_001277794.1	Alpha-S2-casein	CASA2
TVYQYQKAMKPWTQPK	1997.03	XP_025145301.1;NP_001277794.1	Alpha-S2-casein	CASA2
TKLTEEDKNRLNF	1607.84	XP_025145301.1;NP_001277794.1	Alpha-S2-casein	CASA2
MKPWTQPKTNVIPYVRYL	2234.22	XP_025145301.1;NP_001277794.1	Alpha-S2-casein	CASA2
VYQYQKAMKPWTQPKTNVIPYVRYL	3114.66	XP_025145301.1;NP_001277794.1	Alpha-S2-casein	CASA2
YLQYLYQGPIVLNPWDQVKR	2493.33	XP_025145301.1;NP_001277794.1	Alpha-S2-casein	CASA2
LYQGPIVLNPWDQVKR	1926.06	XP_025145301.1;NP_001277794.1	Alpha-S2-casein	CASA2
SSEESIISQETYKQEK	1885.9	XP_025145301.1;NP_001277794.1	Alpha-S2-casein	CASA2
YQGPIVLNPWDQVK	1656.87	XP_025145301.1;NP_001277794.1	Alpha-S2-casein	CASA2
QYLYQGPIVLNPWDQVK	2061.08	XP_025145301.1;NP_001277794.1	Alpha-S2-casein	CASA2
YLYQGPIVLNPWDQVKR	2089.12	XP_025145301.1;NP_001277794.1	Alpha-S2-casein	CASA2
LYQGPIVLNPWDQVK	1769.96	XP_025145301.1;NP_001277794.1	Alpha-S2-casein	CASA2
TKLTEEDKNRLNFLKKISQHYQ	2733.47	XP_025145301.1;NP_001277794.1	Alpha-S2-casein	CASA2
YQKAMKPWTQPKTNVIPYVRYL	2724.47	XP_025145301.1;NP_001277794.1	Alpha-S2-casein	CASA2
IVLNPWDQVKR	1367.78	XP_025145301.1;NP_001277794.1	Alpha-S2-casein	CASA2
IISQETYKQEK	1366.72	XP_025145301.1;NP_001277794.1	Alpha-S2-casein	CASA2
GPIVLNPWDQVK	1365.75	XP_025145301.1;NP_001277794.1	Alpha-S2-casein	CASA2
VLNPWDQVK	1098.59	XP_025145301.1;NP_001277794.1	Alpha-S2-casein	CASA2
LTEEDKNRLNFL	1491.78	XP_025145301.1;NP_001277794.1	Alpha-S2-casein	CASA2
ALNEINQFYQK	1367.7	XP_025145301.1;NP_001277794.1	Alpha-S2-casein	CASA2
ITVDDKHYQ	1118.55	XP_025145301.1;NP_001277794.1	Alpha-S2-casein	CASA2
TEEDKNRLNFLK	1506.79	XP_025145301.1;NP_001277794.1	Alpha-S2-casein	CASA2
TNVIPYVR	961.547	XP_025145301.1;NP_001277794.1	Alpha-S2-casein	CASA2
TNVIPYVRYL	1237.69	XP_025145301.1;NP_001277794.1	Alpha-S2-casein	CASA2
KHTMEHVSSSEESIISQETYK	2450.15	XP_025145301.1;NP_001277794.1	Alpha-S2-casein	CASA2
GPIVLNPWDQVKR	1521.85	XP_025145301.1;NP_001277794.1	Alpha-S2-casein	CASA2
IVLNPWDQVK	1211.68	XP_025145301.1;NP_001277794.1	Alpha-S2-casein	CASA2
RNAVPITPTLNREQLSTSEENSK	2584.33	XP_025145301.1;NP_001277794.1	Alpha-S2-casein	CASA2
TVYQYQKAMKPWTQPKTN	2212.12	XP_025145301.1;NP_001277794.1	Alpha-S2-casein	CASA2
TEEDKNRLNFL	1378.7	XP_025145301.1;NP_001277794.1	Alpha-S2-casein	CASA2
AVPITPTLNREQ	1338.74	XP_025145301.1;NP_001277794.1	Alpha-S2-casein	CASA2
YLYQGPIVLNPWDQVK	1933.02	XP_025145301.1;NP_001277794.1	Alpha-S2-casein	CASA2
KLTEEDKNRLNFL	1619.88	XP_025145301.1;NP_001277794.1	Alpha-S2-casein	CASA2
KHTMEHVSSSEESIISQETYKQE	2707.25	XP_025145301.1;NP_001277794.1	Alpha-S2-casein	CASA2
VSSSEESIISQETYKQEK	2072	XP_025145301.1;NP_001277794.1	Alpha-S2-casein	CASA2
LTEEDKNRLNF	1378.7	XP_025145301.1;NP_001277794.1	Alpha-S2-casein	CASA2
GVSALTRVFAGGKCLSQNPPQSTSR	2561.33	XP_025145337.1	GPI ethanolamine phosphate transferase 2 isoform X1
EKVNELSTDQAMEDIK	1849.88	XP_025145748.1;XP_025145752.1	casein alpha s1	CSN1S1
FPEVFGKEK	1080.57	XP_025145748.1;XP_025145752.1;XP_025145753.1	casein alpha s1	CSN1S1
FPEVFGKE	952.477	XP_025145748.1;XP_025145752.1;XP_025145753.1	casein alpha s1	CSN1S1
RPKQPIKHQGLPQGVLNENLLR	2535.46	XP_025145748.1;XP_025145753.1	casein alpha s1	CSN1S1
RPKQPIKHQGLPQGVLNENLLRFFVAPFPEVFGKEK	4158.31	XP_025145748.1;XP_025145753.1	casein alpha s1	CSN1S1
RPKQPIKHQGLPQGVLNENLLRFFVAPFPEVFGK	3901.18	XP_025145748.1;XP_025145753.1	casein alpha s1	CSN1S1
FVAPFPEVFGKEKV	1593.87	XP_025145748.1;XP_025145753.1	casein alpha s1	CSN1S1
FVAPFPEVFGKEK	1494.8	XP_025145748.1;XP_025145753.1	casein alpha s1	CSN1S1
RPKQPIKHQGLPQGVLNENLLRF	2682.53	XP_025145748.1;XP_025145753.1	casein alpha s1	CSN1S1
RPKQPIKHQGLPQGVLNENLLRFF	2829.6	XP_025145748.1;XP_025145753.1	casein alpha s1	CSN1S1
FFVAPFPEVFGKEKVNE	1984.02	XP_025145748.1;XP_025145753.1	casein alpha s1	CSN1S1
LPQGVLNENLLRF	1512.85	XP_025145748.1;XP_025145753.1	casein alpha s1	CSN1S1
GLPQGVLNENLLRF	1569.87	XP_025145748.1;XP_025145753.1	casein alpha s1	CSN1S1
FFVAPFPEVFGKEK	1641.87	XP_025145748.1;XP_025145753.1	casein alpha s1	CSN1S1
VAPFPEVFGKEKVNE	1689.88	XP_025145748.1;XP_025145753.1	casein alpha s1	CSN1S1
GLPQGVLNENLLR	1422.81	XP_025145748.1;XP_025145753.1	casein alpha s1	CSN1S1
VAPFPEVFGKEK	1347.73	XP_025145748.1;XP_025145753.1	casein alpha s1	CSN1S1
KQPIKHQGLPQGVLNENLLRF	2429.38	XP_025145748.1;XP_025145753.1	casein alpha s1	CSN1S1
GVLNENLLRF	1174.66	XP_025145748.1;XP_025145753.1	casein alpha s1	CSN1S1
FVAPFPEVFGK	1237.66	XP_025145748.1;XP_025145753.1	casein alpha s1	CSN1S1
NENLLRFFVAPFPEVFGK	2124.13	XP_025145748.1;XP_025145753.1	casein alpha s1	CSN1S1
FFVAPFPEVFGK	1384.73	XP_025145748.1;XP_025145753.1	casein alpha s1	CSN1S1
FVAPFPEVFGKE	1366.7	XP_025145748.1;XP_025145753.1	casein alpha s1	CSN1S1
KQPIKHQGLPQGVLNENLLR	2282.31	XP_025145748.1;XP_025145753.1	casein alpha s1	CSN1S1
LPQGVLNENLLR	1365.78	XP_025145748.1;XP_025145753.1	casein alpha s1	CSN1S1
APFPEVFGKEKV	1347.73	XP_025145748.1;XP_025145753.1	casein alpha s1	CSN1S1
VLNENLLRF	1117.64	XP_025145748.1;XP_025145753.1	casein alpha s1	CSN1S1
VAPFPEVFGK	1090.59	XP_025145748.1;XP_025145753.1	casein alpha s1	CSN1S1
FVAPFPEVFGKEKVNE	1836.95	XP_025145748.1;XP_025145753.1	casein alpha s1	CSN1S1
FVAPFPEVFGKEKVNEL	1950.04	XP_025145748.1;XP_025145753.1	casein alpha s1	CSN1S1
VLNENLLR	970.568	XP_025145748.1;XP_025145753.1	casein alpha s1	CSN1S1
APFPEVFGKEK	1248.66	XP_025145748.1;XP_025145753.1	casein alpha s1	CSN1S1
LNENLLRF	1018.57	XP_025145748.1;XP_025145753.1	casein alpha s1	CSN1S1
APFPEVFGK	991.525	XP_025145748.1;XP_025145753.1	casein alpha s1	CSN1S1
GVLNENLLR	1027.59	XP_025145748.1;XP_025145753.1	casein alpha s1	CSN1S1
FFVAPFPEVFGKE	1513.77	XP_025145748.1;XP_025145753.1	casein alpha s1	CSN1S1
PKQPIKHQGLPQGVLNENLLRF	2526.43	XP_025145748.1;XP_025145753.1	casein alpha s1	CSN1S1
LRFFVAPFPEVFGK	1653.92	XP_025145748.1;XP_025145753.1	casein alpha s1	CSN1S1
APFPEVFGKEKVN	1461.77	XP_025145748.1;XP_025145753.1	casein alpha s1	CSN1S1
APFPEVFGKE	1120.57	XP_025145748.1;XP_025145753.1	casein alpha s1	CSN1S1
VAPFPEVFGKE	1219.64	XP_025145748.1;XP_025145753.1	casein alpha s1	CSN1S1
APFPEVFGKEKVNE	1590.82	XP_025145748.1;XP_025145753.1	casein alpha s1	CSN1S1
VAPFPEVFGKEKVN	1560.84	XP_025145748.1;XP_025145753.1	casein alpha s1	CSN1S1
HQGLPQGVLNENLLR	1687.92	XP_025145748.1;XP_025145753.1	casein alpha s1	CSN1S1
HQGLPQGVLNENLLRF	1834.99	XP_025145748.1;XP_025145753.1	casein alpha s1	CSN1S1
PQGVLNENLLRF	1399.77	XP_025145748.1;XP_025145753.1	casein alpha s1	CSN1S1
APFPEVFGKEKVNEL	1703.9	XP_025145748.1;XP_025145753.1	casein alpha s1	CSN1S1
VAPFPEVFGKEKV	1446.8	XP_025145748.1;XP_025145753.1	casein alpha s1	CSN1S1
VAPFPEVFGKEKVNEL	1802.97	XP_025145748.1;XP_025145753.1	casein alpha s1	CSN1S1
FVAPFPEVFGKEKVN	1707.91	XP_025145748.1;XP_025145753.1	casein alpha s1	CSN1S1
VPSERYLGYLEQLLR	1836	XP_025145751.1;XP_025145748.1;XP_025145752.1	casein alpha s1	CSN1S1
YLGYLEQLLRLKK	1636.98	XP_025145751.1;XP_025145748.1;XP_025145752.1	casein alpha s1	CSN1S1
HIQKEDVPSERYLGYLEQLLR	2586.37	XP_025145751.1;XP_025145748.1;XP_025145752.1	casein alpha s1	CSN1S1
HIQKEDVPSERYLGYLEQLLRLK	2827.55	XP_025145751.1;XP_025145748.1;XP_025145752.1	casein alpha s1	CSN1S1
YLGYLEQLLRLK	1508.88	XP_025145751.1;XP_025145748.1;XP_025145752.1	casein alpha s1	CSN1S1
HIQKEDVPSERY	1500.74	XP_025145751.1;XP_025145748.1;XP_025145752.1	casein alpha s1	CSN1S1
YLGYLEQLLRL	1380.79	XP_025145751.1;XP_025145748.1;XP_025145752.1	casein alpha s1	CSN1S1
VPSERYLGYLEQLLRLK	2077.18	XP_025145751.1;XP_025145748.1;XP_025145752.1	casein alpha s1	CSN1S1
HIQKEDVPSER	1337.68	XP_025145751.1;XP_025145748.1;XP_025145752.1	casein alpha s1	CSN1S1
GYLEQLLRLKKY	1523.89	XP_025145751.1;XP_025145748.1;XP_025145752.1	casein alpha s1	CSN1S1
LGYLEQLLRLK	1345.82	XP_025145751.1;XP_025145748.1;XP_025145752.1	casein alpha s1	CSN1S1
LGYLEQLLRL	1217.73	XP_025145751.1;XP_025145748.1;XP_025145752.1	casein alpha s1	CSN1S1
YLGYLEQLLR	1267.7	XP_025145751.1;XP_025145748.1;XP_025145752.1	casein alpha s1	CSN1S1
LGYLEQLLR	1104.64	XP_025145751.1;XP_025145748.1;XP_025145752.1	casein alpha s1	CSN1S1
IQKEDVPSERY	1363.69	XP_025145751.1;XP_025145748.1;XP_025145752.1	casein alpha s1	CSN1S1
KEDVPSERY	1122.54	XP_025145751.1;XP_025145748.1;XP_025145752.1	casein alpha s1	CSN1S1
GYLEQLLRLK	1232.74	XP_025145751.1;XP_025145748.1;XP_025145752.1	casein alpha s1	CSN1S1
GYLEQLLRL	1104.64	XP_025145751.1;XP_025145748.1;XP_025145752.1	casein alpha s1	CSN1S1
YLEQLLRLK	1175.71	XP_025145751.1;XP_025145748.1;XP_025145752.1	casein alpha s1	CSN1S1
HIQKEDVPSERYLGY	1833.91	XP_025145751.1;XP_025145748.1;XP_025145752.1	casein alpha s1	CSN1S1
YLGYLEQLLRLKKY	1800.04	XP_025145751.1;XP_025145748.1;XP_025145752.1	casein alpha s1	CSN1S1
HIQKEDVPSERYLG	1670.85	XP_025145751.1;XP_025145748.1;XP_025145752.1	casein alpha s1	CSN1S1
LEQLLRLK	1012.65	XP_025145751.1;XP_025145748.1;XP_025145752.1	casein alpha s1	CSN1S1
IQKEDVPSERYLGY	1696.85	XP_025145751.1;XP_025145748.1;XP_025145752.1	casein alpha s1	CSN1S1
YLEQLLRLKKY	1466.87	XP_025145751.1;XP_025145748.1;XP_025145752.1	casein alpha s1	CSN1S1
HIQKEDVPSERYLGYLEQLLRLKK	2955.64	XP_025145751.1;XP_025145748.1;XP_025145752.1	casein alpha s1	CSN1S1
YNVPQLEIVPNLAEEQLHSMKEGIHAQQK	3343.71	XP_025145751.1;XP_025145748.1;XP_025145752.1;XP_025145753.1	casein alpha s1	CSN1S1
KYNVPQLEIVPNLAEEQLHSMKEGIHAQQK	3471.81	XP_025145751.1;XP_025145748.1;XP_025145752.1;XP_025145753.1	casein alpha s1	CSN1S1
LKKYNVPQLEIVPNLAEEQLHSMKEGIHAQQK	3712.98	XP_025145751.1;XP_025145748.1;XP_025145752.1;XP_025145753.1	casein alpha s1	CSN1S1
KYNVPQLEIVPNLAEEQLHSMKEGIHAQQ	3343.71	XP_025145751.1;XP_025145748.1;XP_025145752.1;XP_025145753.1	casein alpha s1	CSN1S1
KYNVPQLEIVPNLAEEQLHSMK	2580.35	XP_025145751.1;XP_025145748.1;XP_025145752.1;XP_025145753.1	casein alpha s1	CSN1S1
LKKYNVPQLEIVPNLAEEQLHSMK	2821.53	XP_025145751.1;XP_025145748.1;XP_025145752.1;XP_025145753.1	casein alpha s1	CSN1S1
LKKYNVPQLEIVPNLAEEQLHSMKEGIHAQQ	3584.89	XP_025145751.1;XP_025145748.1;XP_025145752.1;XP_025145753.1	casein alpha s1	CSN1S1
KYNVPQLEIVPNLAEEQLHSMKEG	2766.41	XP_025145751.1;XP_025145748.1;XP_025145752.1;XP_025145753.1	casein alpha s1	CSN1S1
YNVPQLEIVPNLAEEQLHSMKEGIHAQQ	3215.62	XP_025145751.1;XP_025145748.1;XP_025145752.1;XP_025145753.1	casein alpha s1	CSN1S1
EGIHAQQKEPMIGVNQELAYFYPQLFR	3206.61	XP_025145751.1;XP_025145748.1;XP_025145752.1;XP_025145753.1	casein alpha s1	CSN1S1
YNVPQLEIVPNLAEEQLHSM	2324.16	XP_025145751.1;XP_025145748.1;XP_025145752.1;XP_025145753.1	casein alpha s1	CSN1S1
IVPNLAEEQLHSM	1480.75	XP_025145751.1;XP_025145748.1;XP_025145752.1;XP_025145753.1	casein alpha s1	CSN1S1
VPNLAEEQLH	1149.59	XP_025145751.1;XP_025145748.1;XP_025145752.1;XP_025145753.1	casein alpha s1	CSN1S1
EIVPNLAEEQLHSM	1609.79	XP_025145751.1;XP_025145748.1;XP_025145752.1;XP_025145753.1	casein alpha s1	CSN1S1
NVPQLEIVPNLAEEQLHSM	2161.1	XP_025145751.1;XP_025145748.1;XP_025145752.1;XP_025145753.1	casein alpha s1	CSN1S1
LEIVPNLAEEQLHSM	1722.87	XP_025145751.1;XP_025145748.1;XP_025145752.1;XP_025145753.1	casein alpha s1	CSN1S1
LKKYNVPQLEIVPNLAEEQLHSM	2693.43	XP_025145751.1;XP_025145748.1;XP_025145752.1;XP_025145753.1	casein alpha s1	CSN1S1
IPNPIGSENSGKTT	1414.72	XP_025145751.1;XP_025145748.1;XP_025145752.1;XP_025145753.1	casein alpha s1	CSN1S1
YNVPQLEIVPNLAEEQLHS	2193.12	XP_025145751.1;XP_025145748.1;XP_025145752.1;XP_025145753.1	casein alpha s1	CSN1S1
LEIVPNLAEEQLHSMK	1850.97	XP_025145751.1;XP_025145748.1;XP_025145752.1;XP_025145753.1	casein alpha s1	CSN1S1
KYNVPQLEIVPNLAEEQLHS	2321.21	XP_025145751.1;XP_025145748.1;XP_025145752.1;XP_025145753.1	casein alpha s1	CSN1S1
VPNLAEEQLHSM	1367.66	XP_025145751.1;XP_025145748.1;XP_025145752.1;XP_025145753.1	casein alpha s1	CSN1S1
DIPNPIGSENSGKTT	1529.74	XP_025145751.1;XP_025145748.1;XP_025145752.1;XP_025145753.1	casein alpha s1	CSN1S1
IVPNLAEEQLH	1262.67	XP_025145751.1;XP_025145748.1;XP_025145752.1;XP_025145753.1	casein alpha s1	CSN1S1
LEIVPNLAEEQLH	1504.8	XP_025145751.1;XP_025145748.1;XP_025145752.1;XP_025145753.1	casein alpha s1	CSN1S1
NVPQLEIVPNLAEEQLHS	2030.06	XP_025145751.1;XP_025145748.1;XP_025145752.1;XP_025145753.1	casein alpha s1	CSN1S1
LKKYNVPQLEIVPNLAEEQLH	2475.36	XP_025145751.1;XP_025145748.1;XP_025145752.1;XP_025145753.1	casein alpha s1	CSN1S1
IVPNLAEEQLHSMK	1608.84	XP_025145751.1;XP_025145748.1;XP_025145752.1;XP_025145753.1	casein alpha s1	CSN1S1
KYNVPQLEIVPNLAEEQLHSM	2452.25	XP_025145751.1;XP_025145748.1;XP_025145752.1;XP_025145753.1	casein alpha s1	CSN1S1
EIVPNLAEEQLHSMK	1737.88	XP_025145751.1;XP_025145748.1;XP_025145752.1;XP_025145753.1	casein alpha s1	CSN1S1
NVPQLEIVPNLAEEQLH	1943.02	XP_025145751.1;XP_025145748.1;XP_025145752.1;XP_025145753.1	casein alpha s1	CSN1S1
VPQLEIVPNLAEEQLHSM	2047.05	XP_025145751.1;XP_025145748.1;XP_025145752.1;XP_025145753.1	casein alpha s1	CSN1S1
EIVPNLAEEQLH	1391.72	XP_025145751.1;XP_025145748.1;XP_025145752.1;XP_025145753.1	casein alpha s1	CSN1S1
YNVPQLEIVPNLAEEQLH	2106.09	XP_025145751.1;XP_025145748.1;XP_025145752.1;XP_025145753.1	casein alpha s1	CSN1S1
LAEEQLHSM	1057.5	XP_025145751.1;XP_025145748.1;XP_025145752.1;XP_025145753.1	casein alpha s1	CSN1S1
LKKYNVPQLEIVPNLAEEQLHS	2562.39	XP_025145751.1;XP_025145748.1;XP_025145752.1;XP_025145753.1	casein alpha s1	CSN1S1
LEIVPNLAEEQLHS	1591.83	XP_025145751.1;XP_025145748.1;XP_025145752.1;XP_025145753.1	casein alpha s1	CSN1S1
NLAEEQLHSM	1171.54	XP_025145751.1;XP_025145748.1;XP_025145752.1;XP_025145753.1	casein alpha s1	CSN1S1
IPNPIGSENSGKTTMPLW	1941.97	XP_025145751.1;XP_025145748.1;XP_025145752.1;XP_025145753.1	casein alpha s1	CSN1S1
RPKQPIKHQGLPQPFPEVFGK	2428.36	XP_025145751.1;XP_025145752.1	casein alpha s1	CSN1S1
IGSESTEDQAMEDIK	1652.73	XP_025145751.1;XP_025145753.1	casein alpha s1	CSN1S1
RPKQPIKHQGLPQPFPEVFGKEK	2685.5	XP_025145752.1	casein alpha s1	CSN1S1
EKVNELSTDIGSESTEDQAMEDIK	2668.21	XP_025145753.1	casein alpha s1	CSN1S1
KVNELSTDIGSESTEDQAMEDIK	2539.17	XP_025145753.1	casein alpha s1	CSN1S1
VNELSTDIGSESTEDQAMEDIK	2411.08	XP_025145753.1	casein alpha s1	CSN1S1
FFVAPFPEVFGKEKVNELSTDIGSESTEDQAMEDIK	4033.93	XP_025145753.1	casein alpha s1	CSN1S1
LPELSGPSAGRPPAARA	1646.9	XP_025147975.1	membrane protein FAM174A isoform X1
VSNTQDASVSIVDYYEPRRRAV	2525.27	XP_025150659.1	CD109 molecule	CD109
VSNTQDASVSIVDYYEPR	2042.97	XP_025150659.1	CD109 molecule	CD109
VDYYEPR	941.436	XP_025150659.1	CD109 molecule	CD109
WFREKVSPAVFVSREGREQEGEEIAEYR	3383.68	XP_025151074.1	butyrophilin subfamily 1 member A1	BTN1A1
VSPAVFVSREGREQEGEEIAEYR	2637.29	XP_025151074.1	butyrophilin subfamily 1 member A1	BTN1A1
VSLVEDHIAEGRVAVR	1749.96	XP_025151074.1	butyrophilin subfamily 1 member A1	BTN1A1
VSLVEDHIAEGR	1324.69	XP_025151074.1	butyrophilin subfamily 1 member A1	BTN1A1
EKVSPAVFVSREGREQEGEEIAEYR	2894.43	XP_025151074.1	butyrophilin subfamily 1 member A1	BTN1A1
GRVSLVEDHIAEGRVAVR	1963.08	XP_025151074.1	butyrophilin subfamily 1 member A1	BTN1A1
LVEDHIAEGRVAVR	1563.86	XP_025151074.1	butyrophilin subfamily 1 member A1	BTN1A1
KATLHAVDVTLDPDTAHPHLFLYEDSKSVR	3375.73	XP_025151074.1	butyrophilin subfamily 1 member A1	BTN1A1
EGREQEGEEIAEYRGR	1907.88	XP_025151074.1	butyrophilin subfamily 1 member A1	BTN1A1
FREKVSPAVFVSREGREQEGEEIAEYR	3197.6	XP_025151074.1	butyrophilin subfamily 1 member A1	BTN1A1
VFVSREGREQEGEEIAEYR	2283.1	XP_025151074.1	butyrophilin subfamily 1 member A1	BTN1A1
EGREQEGEEIAEYRGRVSLVEDHIAEGR	3213.55	XP_025151074.1	butyrophilin subfamily 1 member A1	BTN1A1
GRVSLVEDHIAEGR	1537.81	XP_025151074.1	butyrophilin subfamily 1 member A1	BTN1A1
EQEGEEIAEYR	1352.6	XP_025151074.1	butyrophilin subfamily 1 member A1	BTN1A1
EGREQEGEEIAEYRGRVS	2093.98	XP_025151074.1	butyrophilin subfamily 1 member A1	BTN1A1
LVEDHIAEGR	1138.59	XP_025151074.1	butyrophilin subfamily 1 member A1	BTN1A1
SLVEDHIAEGR	1225.62	XP_025151074.1	butyrophilin subfamily 1 member A1	BTN1A1
EKVSPAVFVSREGREQEGEEIAEYRGR	3107.55	XP_025151074.1	butyrophilin subfamily 1 member A1	BTN1A1
WFREKVSPAVFVSREGREQEGEEIAEYRGR	3596.8	XP_025151074.1	butyrophilin subfamily 1 member A1	BTN1A1
EGREQEGEEIAEYR	1694.76	XP_025151074.1	butyrophilin subfamily 1 member A1	BTN1A1
EQEGEEIAEYRGRVS	1751.82	XP_025151074.1	butyrophilin subfamily 1 member A1	BTN1A1
SLVEDHIAEGRVAVR	1650.89	XP_025151074.1	butyrophilin subfamily 1 member A1	BTN1A1
REGREQEGEEIAEYR	1850.86	XP_025151074.1	butyrophilin subfamily 1 member A1	BTN1A1
WFREKVSPAVFVSREGR	2050.1	XP_025151074.1	butyrophilin subfamily 1 member A1	BTN1A1
GREQEGEEIAEYR	1565.72	XP_025151074.1	butyrophilin subfamily 1 member A1	BTN1A1
VFVSREGREQEGEEIAEYRGR	2496.22	XP_025151074.1	butyrophilin subfamily 1 member A1	BTN1A1
VSPAVFVSREGREQEGEEIAEYRGR	2850.41	XP_025151074.1	butyrophilin subfamily 1 member A1	BTN1A1
EQEGEEIAEYRGRVSLVEDHIAEGR	2871.39	XP_025151074.1	butyrophilin subfamily 1 member A1	BTN1A1
VEDHIAEGR	1025.5	XP_025151074.1	butyrophilin subfamily 1 member A1	BTN1A1
VEDHIAEGRVAVR	1450.78	XP_025151074.1	butyrophilin subfamily 1 member A1	BTN1A1
EGREQEGEEIAEYRGRVSLVEDHIAEGRVAVR	3638.83	XP_025151074.1	butyrophilin subfamily 1 member A1	BTN1A1
AVFVSREGREQEGEEIAEYR	2354.14	XP_025151074.1	butyrophilin subfamily 1 member A1	BTN1A1
EVEVSIPASLFPR	1443.78	XP_025151074.1	butyrophilin subfamily 1 member A1	BTN1A1
LVEDHIAEGRVA	1308.69	XP_025151074.1	butyrophilin subfamily 1 member A1	BTN1A1
GRVSLVEDHIAEGRVAV	1806.98	XP_025151074.1	butyrophilin subfamily 1 member A1	BTN1A1
FVSREGREQEGEEIAEYR	2184.03	XP_025151074.1	butyrophilin subfamily 1 member A1	BTN1A1
EQEGEEIAEYRG	1409.62	XP_025151074.1	butyrophilin subfamily 1 member A1	BTN1A1
NISKEIPLSPMGEDSASGDIETLHSK	2755.35	XP_025151074.1	butyrophilin subfamily 1 member A1	BTN1A1
REQEGEEIAEYR	1508.7	XP_025151074.1	butyrophilin subfamily 1 member A1	BTN1A1
VSPAVFVSREGREQEGEEIAEYRG	2694.31	XP_025151074.1	butyrophilin subfamily 1 member A1	BTN1A1
EGEEIAEYR	1095.5	XP_025151074.1	butyrophilin subfamily 1 member A1	BTN1A1
IPASLFPRL	1013.61	XP_025151074.1	butyrophilin subfamily 1 member A1	BTN1A1
DAKNISKEIPLSPMGEDSASGDIETLH	2854.38	XP_025151074.1	butyrophilin subfamily 1 member A1	BTN1A1
NLLLGQEKEVEVSIPASLFPR	2339.3	XP_025151074.1	butyrophilin subfamily 1 member A1	BTN1A1
VSPAVFVSREGREQEGEEIAEYRGRVSLVEDHIAEGR	4156.08	XP_025151074.1	butyrophilin subfamily 1 member A1	BTN1A1
VSIPASLFPR	1086.63	XP_025151074.1	butyrophilin subfamily 1 member A1	BTN1A1
GREQEGEEIAEYRGRVS	1964.94	XP_025151074.1	butyrophilin subfamily 1 member A1	BTN1A1
EGEEIAEYRGR	1308.62	XP_025151074.1	butyrophilin subfamily 1 member A1	BTN1A1
IPASLFPRLTP	1211.71	XP_025151074.1	butyrophilin subfamily 1 member A1	BTN1A1
VEDHIAEGRVAV	1294.67	XP_025151074.1	butyrophilin subfamily 1 member A1	BTN1A1
EGREQEGEEIAEYRGRVSL	2207.07	XP_025151074.1	butyrophilin subfamily 1 member A1	BTN1A1
RVSLVEDHIAEGR	1480.79	XP_025151074.1	butyrophilin subfamily 1 member A1	BTN1A1
WFREKVSPAVFVSREGREQEGEEIAEYRG	3440.7	XP_025151074.1	butyrophilin subfamily 1 member A1	BTN1A1
EGREQEGEEIAEYRG	1751.78	XP_025151074.1	butyrophilin subfamily 1 member A1	BTN1A1
VSREGREQEGEEIAEYR	2036.96	XP_025151074.1	butyrophilin subfamily 1 member A1	BTN1A1
SREGREQEGEEIAEYR	1937.89	XP_025151074.1	butyrophilin subfamily 1 member A1	BTN1A1
GREQEGEEIAEYRGRVSLVEDHIAEGR	3084.51	XP_025151074.1	butyrophilin subfamily 1 member A1	BTN1A1
THRGEEFPSMSESRNPDEEGLFTVR	2907.33	XP_025151074.1;NP_001277824.1	butyrophilin subfamily 1 member A1	BTN1A1
GEEFPSMSESRNPDEEGLFTVR	2513.12	XP_025151074.1;NP_001277824.1	butyrophilin subfamily 1 member A1	BTN1A1
MSESRNPDEEGLFTVR	1866.87	XP_025151074.1;NP_001277824.1	butyrophilin subfamily 1 member A1	BTN1A1
IPLSPMGEDSASGDIETLH	1968.92	XP_025151074.1;NP_001277824.1	butyrophilin subfamily 1 member A1	BTN1A1
VDVTLDPDTAHPHLFLYEDSKSVR	2754.37	XP_025151074.1;NP_001277824.1	butyrophilin subfamily 1 member A1	BTN1A1
SPMGEDSASGDIETLH	1645.7	XP_025151074.1;NP_001277824.1	butyrophilin subfamily 1 member A1	BTN1A1
SMSESRNPDEEGLFTVR	1953.9	XP_025151074.1;NP_001277824.1	butyrophilin subfamily 1 member A1	BTN1A1
PDTAHPHLFLYEDSKSVR	2112.05	XP_025151074.1;NP_001277824.1	butyrophilin subfamily 1 member A1	BTN1A1
RGEEFPSMSESRNPDEEGLFTVR	2669.23	XP_025151074.1;NP_001277824.1	butyrophilin subfamily 1 member A1	BTN1A1
SESRNPDEEGLFTVR	1735.82	XP_025151074.1;NP_001277824.1	butyrophilin subfamily 1 member A1	BTN1A1
FREKVSPAVFVSR	1521.85	XP_025151074.1;NP_001277824.1	butyrophilin subfamily 1 member A1	BTN1A1
LSPMGEDSASGDIETLH	1758.79	XP_025151074.1;NP_001277824.1	butyrophilin subfamily 1 member A1	BTN1A1
DPDTAHPHLFLYEDSK	1884.88	XP_025151074.1;NP_001277824.1	butyrophilin subfamily 1 member A1	BTN1A1
NPDEEGLFTVR	1276.62	XP_025151074.1;NP_001277824.1	butyrophilin subfamily 1 member A1	BTN1A1
PDEEGLFTVR	1162.57	XP_025151074.1;NP_001277824.1	butyrophilin subfamily 1 member A1	BTN1A1
FREKVSPAVFVSREG	1707.92	XP_025151074.1;NP_001277824.1	butyrophilin subfamily 1 member A1	BTN1A1
LDPDTAHPHLFLYEDSK	1997.96	XP_025151074.1;NP_001277824.1	butyrophilin subfamily 1 member A1	BTN1A1
KEIPLSPMGEDSASGDIETLH	2226.06	XP_025151074.1;NP_001277824.1	butyrophilin subfamily 1 member A1	BTN1A1
HRGEEFPSMSESRNPDEEGLFTVR	2806.28	XP_025151074.1;NP_001277824.1	butyrophilin subfamily 1 member A1	BTN1A1
WFREKVSPAVFVSR	1707.93	XP_025151074.1;NP_001277824.1	butyrophilin subfamily 1 member A1	BTN1A1
WFREKVSPAVFVSREG	1894	XP_025151074.1;NP_001277824.1	butyrophilin subfamily 1 member A1	BTN1A1
ASGDIETLH	942.453	XP_025151074.1;NP_001277824.1	butyrophilin subfamily 1 member A1	BTN1A1
NEFSSKEKLLEELKWK	2008.07	XP_025151074.1;NP_001277824.1	butyrophilin subfamily 1 member A1	BTN1A1
HPHLFLYEDSK	1385.68	XP_025151074.1;NP_001277824.1	butyrophilin subfamily 1 member A1	BTN1A1
ESRNPDEEGLFTVR	1648.79	XP_025151074.1;NP_001277824.1	butyrophilin subfamily 1 member A1	BTN1A1
EDSASGDIETLH	1273.55	XP_025151074.1;NP_001277824.1	butyrophilin subfamily 1 member A1	BTN1A1
IPLSPMGEDSASGDIETLHSK	2184.05	XP_025151074.1;NP_001277824.1	butyrophilin subfamily 1 member A1	BTN1A1
EEGLFTVR	950.494	XP_025151074.1;NP_001277824.1	butyrophilin subfamily 1 member A1	BTN1A1
REKVSPAVFVSR	1374.79	XP_025151074.1;NP_001277824.1	butyrophilin subfamily 1 member A1	BTN1A1
DEEGLFTVR	1065.52	XP_025151074.1;NP_001277824.1	butyrophilin subfamily 1 member A1	BTN1A1
VSPAVFVSREG	1147.61	XP_025151074.1;NP_001277824.1	butyrophilin subfamily 1 member A1	BTN1A1
SASGDIETLH	1029.48	XP_025151074.1;NP_001277824.1	butyrophilin subfamily 1 member A1	BTN1A1
REKVSPAVFVSREG	1560.85	XP_025151074.1;NP_001277824.1	butyrophilin subfamily 1 member A1	BTN1A1
VAALGSDPHISMK	1325.69	XP_025151074.1;NP_001277824.1	butyrophilin subfamily 1 member A1	BTN1A1
QDENYEEAIVHL	1459.67	XP_025151074.1;NP_001277824.1	butyrophilin subfamily 1 member A1	BTN1A1
VAVRIQEVKASDDGEYR	1934.99	XP_025151074.1;NP_001277824.1	butyrophilin subfamily 1 member A1	BTN1A1
AHPHLFLYEDSK	1456.72	XP_025151074.1;NP_001277824.1	butyrophilin subfamily 1 member A1	BTN1A1
DENYEEAIVHLK	1459.71	XP_025151074.1;NP_001277824.1	butyrophilin subfamily 1 member A1	BTN1A1
QDENYEEAIVHLK	1587.76	XP_025151074.1;NP_001277824.1	butyrophilin subfamily 1 member A1	BTN1A1
VDVTLDPDTAHPH	1416.68	XP_025151074.1;NP_001277824.1	butyrophilin subfamily 1 member A1	BTN1A1
SPAVFVSREG	1048.54	XP_025151074.1;NP_001277824.1	butyrophilin subfamily 1 member A1	BTN1A1
DSASGDIETLH	1144.51	XP_025151074.1;NP_001277824.1	butyrophilin subfamily 1 member A1	BTN1A1
FPSMSESRNPDEEGLFTVR	2198.02	XP_025151074.1;NP_001277824.1	butyrophilin subfamily 1 member A1	BTN1A1
EIPLSPMGEDSASGDIETLHSKLIPLQPSQ	3189.6	XP_025151074.1;NP_001277824.1	butyrophilin subfamily 1 member A1	BTN1A1
IQEVKASDDGEYR	1509.72	XP_025151074.1;NP_001277824.1	butyrophilin subfamily 1 member A1	BTN1A1
VSPAVFVSR	961.547	XP_025151074.1;NP_001277824.1	butyrophilin subfamily 1 member A1	BTN1A1
EKVSPAVFVSR	1218.68	XP_025151074.1;NP_001277824.1	butyrophilin subfamily 1 member A1	BTN1A1
GEEFPSMSESR	1255.53	XP_025151074.1;NP_001277824.1	butyrophilin subfamily 1 member A1	BTN1A1
LLEELKWK	1058.62	XP_025151074.1;NP_001277824.1	butyrophilin subfamily 1 member A1	BTN1A1
EKVSPAVFVSREG	1404.75	XP_025151074.1;NP_001277824.1	butyrophilin subfamily 1 member A1	BTN1A1
GEEFPSMSESRNP	1466.62	XP_025151074.1;NP_001277824.1	butyrophilin subfamily 1 member A1	BTN1A1
HRGEEFPSMSESR	1548.69	XP_025151074.1;NP_001277824.1	butyrophilin subfamily 1 member A1	BTN1A1
ENYEEAIVHLK	1344.68	XP_025151074.1;NP_001277824.1	butyrophilin subfamily 1 member A1	BTN1A1
GEDSASGDIETLH	1330.58	XP_025151074.1;NP_001277824.1	butyrophilin subfamily 1 member A1	BTN1A1
VDVTLDPDTAHPHL	1529.76	XP_025151074.1;NP_001277824.1	butyrophilin subfamily 1 member A1	BTN1A1
IPLSPMGEDSASGDIETLHS	2055.95	XP_025151074.1;NP_001277824.1	butyrophilin subfamily 1 member A1	BTN1A1
EIPLSPMGEDSASGDIETLH	2097.96	XP_025151074.1;NP_001277824.1	butyrophilin subfamily 1 member A1	BTN1A1
KEIPLSPMGEDSASGDIETLHSK	2441.19	XP_025151074.1;NP_001277824.1	butyrophilin subfamily 1 member A1	BTN1A1
RNPDEEGLFTVR	1432.72	XP_025151074.1;NP_001277824.1	butyrophilin subfamily 1 member A1	BTN1A1
THRGEEFPSMSESR	1649.73	XP_025151074.1;NP_001277824.1	butyrophilin subfamily 1 member A1	BTN1A1
DVTLDPDTAHPH	1317.61	XP_025151074.1;NP_001277824.1	butyrophilin subfamily 1 member A1	BTN1A1
KKPPQQLEWKLNTGRTEAW	2310.24	XP_025123765.1	advanced glycosylation end-product specific receptor	AGER
NAVPITPTLNREQLSTSEENSKKTVDMESTEVITKKTK	4247.21	XP_025145301.1	casein alpha s2	CSN1S2
FPQYLQYLYQGPIVLNPWDQVKR	2865.51	XP_025145301.1;NP_001277794.1	casein alpha s2	CSN1S2
KTKLTEEDKNRLN	1588.87	XP_025145301.1;NP_001277794.1	casein alpha s2	CSN1S2
LNEINQFYQK	1296.66	XP_025145301.1;NP_001277794.1	casein alpha s2	CSN1S2
TPAQFDAEELR	1276.62	XP_006067744.1	annexin A1	ANXA1
TPAQFDAEELRAAM	1549.73	XP_006067744.1	annexin A1	ANXA1
KTDLEKDIVSDTSGDFRK	2054.04	XP_006043337.1	annexin A2	ANXA2
ELIDQDARDLYDAGVK	1820.9	XP_006043337.1	annexin A2	ANXA2
EQEGEEIAEYRGR	1565.72	XP_025151074.1	butyrophilin subfamily 1 member A1	BTN1A1
FREKVSPAVFVSREGR	1864.02	XP_025151074.1	butyrophilin subfamily 1 member A1	BTN1A1
IPASLFPRLTPWM	1528.83	XP_025151074.1	butyrophilin subfamily 1 member A1	BTN1A1
SPAVFVSREGREQEGEEIAEYR	2538.22	XP_025151074.1	butyrophilin subfamily 1 member A1	BTN1A1
EEFPSMSESRNPDEEGLFTVR	2456.1	XP_025151074.1;NP_001277824.1	butyrophilin subfamily 1 member A1	BTN1A1
DVPSERYLGYLEQLLR	1951.03	XP_025145751.1;XP_025145748.1;XP_025145752.1	casein alpha s1	CSN1S1
KKYNVPQLEIVPNLAEEQLHSM	2580.35	XP_025145751.1;XP_025145748.1;XP_025145752.1;XP_025145753.1	casein alpha s1	CSN1S1
QLEIVPNLAEEQLHSM	1850.93	XP_025145751.1;XP_025145748.1;XP_025145752.1;XP_025145753.1	casein alpha s1	CSN1S1
EKVNELSTDIGSESTEDQAMEDIKEQLLR	3307.58	XP_025145753.1	casein alpha s1	CSN1S1
STDIGSESTEDQAMEDIK	1955.84	XP_025145753.1	casein alpha s1	CSN1S1
LAVRGEPGDSAAEEAAALTGEWR	2356.15	XP_025116432.1	cyclin and CBS domain divalent metal cation transport mediator 3	CNNM3
EIAEAYETLSDANR	1581.74	XP_006050765.1	DnaJ heat shock protein family (Hsp40) member B9	DNAJB9
EGVAINPARVLDLGPITR	1891.08	XP_025130401.1	pancreatic secretory granule membrane major glycoprotein GP2	GP2
NPARVLDLGPITR	1421.82	XP_025130401.1	pancreatic secretory granule membrane major glycoprotein GP2	GP2
SSRQPQNQNPKLPLSILKEKHLRNAA	2967.66	XP_006063747.1	glycosylation-dependent cell adhesion molecule 1	LOC102399155
PQNQNPKLPLSILKEKHL	2097.22	XP_006063747.1	glycosylation-dependent cell adhesion molecule 1	LOC102399155
QPQNQNPKLPLSILKEKH	2112.19	XP_006063747.1	glycosylation-dependent cell adhesion molecule 1	LOC102399155
EQIVIRSSRQPQNQNPKLPLSILKEKHL	3293.88	XP_006063747.1	glycosylation-dependent cell adhesion molecule 1	LOC102399155
LSRYPSYGLNYYQQKPVALINNQFLPYPYYAKPAAVRSPAQIL	4975.63	NP_001277901.1	Kappa-casein	CSN3
QEQNQEQPIR	1269.62	NP_001277901.1	Kappa-casein	CSN3
WPELENGQPTSEKYTVKADGEQSAKPEKAKETEKDDTGTPITKIEFVPSH	5570.74	NP_001277801.1	Na(+)-dependent phosphate cotransporter 2B	Slc34a2
DTIAQAASTTTISDAVSKVKIQVNKAFLDSRT	3379.81	NP_001277812.1	Lactoperoxidase	LPO
DTIAQAASTTTISDAVSKVKIQVNKAFLDSRTRL	3648.99	NP_001277812.1	Lactoperoxidase	LPO
KKVEGFDMVQKPSYYVRLG	2244.18	XP_006070958.1	perilipin 2	PLIN2
IHPFAQTQSLVYPFPGPIPKSLPQNIPPLTQTPVVVPPFLQPEIMGVSKVKEAMAPK	6199.39	XP_006071186.1	casein beta	CSN2
VYPFPGPIPKSLPQNIPPLTQTPVVVPPFLQPEIMGVSKVKEAMAPK	5076.81	XP_006071186.1	casein beta	CSN2
RELEELNVPGEIVESLSSSEESITHIN	3010.49	XP_006071186.1	casein beta	CSN2
LYQEPVLGPVRGPFPIIV	1994.15	XP_006071186.1;NP_001277808.1	casein beta	CSN2
VLPVPQKAVPYPQRDMPIQAFLLYQEPVLGPVRGPFP	4157.28	XP_006071186.1;NP_001277808.1	casein beta	CSN2
FPALTEGYVGTLHENRQGSSVQAQIR	2858.45	XP_006063039.1	protein tyrosine phosphatase receptor type G	PTPRG
NPQGQSQITDPRQAQSSPPWSY	2472.15	XP_025116737.1	RUNX family transcription factor 2	RUNX2
YNAPPEVVAAKMEVK	1645.86	XP_006043251.1	secretoglobin family 1D member	LOC102395773
WSGPVGVSWGLR	1300.68	XP_025143934.1	sortilin 1	SORT1
NYLEDGESDGFLR	1514.68	XP_006067282.1	transmembrane protein 59	TMEM59
VSTKGKRKPRQEEDEDYREFPQKKHKLYGRKQRPKAQPNPK	5005.71	XP_006046217.1	zinc finger protein 512	ZNF512

## Sheet: Total NAS positive
Total peptides identified in NAS-positive milk samples.
Sequence	Theo. MH+ [Da]	Master Protein Accessions	Protein names	Gene names
TKLTEEDKNRLNFLKKISQHYQKFAWPQYLKTVYQYQK	4805.56	NP_001277794.1	Alpha-S2-casein	CASA2
KISQHYQKFAWPQYLKTVYQYQK	2975.56	NP_001277794.1	Alpha-S2-casein	CASA2
ISQHYQKFAWPQYLKTVYQYQK	2847.46	NP_001277794.1	Alpha-S2-casein	CASA2
KISQHYQKFAWPQYLK	2065.1	NP_001277794.1	Alpha-S2-casein	CASA2
WPELENGQPTSEK	1514.71	NP_001277801.1	Na(+)-dependent phosphate cotransporter 2B	Slc34a2
AKPEKAKETEKDDTGTPITKIEFVPSH	2996.56	NP_001277801.1	Na(+)-dependent phosphate cotransporter 2B	Slc34a2
WPELENGQPTSEKYTVK	2005.99	NP_001277801.1	Na(+)-dependent phosphate cotransporter 2B	Slc34a2
SAKPEKAKETEKDDTGTPITKIEFVPSH	3083.59	NP_001277801.1	Na(+)-dependent phosphate cotransporter 2B	Slc34a2
TPITKIEFVPSH	1368.75	NP_001277801.1	Na(+)-dependent phosphate cotransporter 2B	Slc34a2
GTPITKIEFVPSH	1425.77	NP_001277801.1	Na(+)-dependent phosphate cotransporter 2B	Slc34a2
KPEKAKETEKDDTGTPITKIEFVPSH	2925.52	NP_001277801.1	Na(+)-dependent phosphate cotransporter 2B	Slc34a2
WPELENGQPTSEKYTVKADGEQS	2593.21	NP_001277801.1	Na(+)-dependent phosphate cotransporter 2B	Slc34a2
DDTGTPITKI	1060.55	NP_001277801.1	Na(+)-dependent phosphate cotransporter 2B	Slc34a2
WPELENGQPTSEKYTVKADGEQ	2506.17	NP_001277801.1	Na(+)-dependent phosphate cotransporter 2B	Slc34a2
APWPELENGQPTSEKYTVK	2174.08	NP_001277801.1	Na(+)-dependent phosphate cotransporter 2B	Slc34a2
APWPELENGQPTSEKYTVKADGEQS	2761.3	NP_001277801.1	Na(+)-dependent phosphate cotransporter 2B	Slc34a2
WPELENGQPTSEKY	1677.78	NP_001277801.1	Na(+)-dependent phosphate cotransporter 2B	Slc34a2
TGTPITKIEFVPSH	1526.82	NP_001277801.1	Na(+)-dependent phosphate cotransporter 2B	Slc34a2
DTIAQAASTTTISDAVSKVKIQVNKAFLDSR	3278.76	NP_001277812.1	lactoperoxidase	LPO
TTLSSEAPTTQQLSEYFKHAKGQTR	2809.41	NP_001277812.1	lactoperoxidase	LPO
DTIAQAASTTTISDAVSKVKIQVNK	2589.41	NP_001277812.1	lactoperoxidase	LPO
DTIAQAASTTTISDAVSKVKIQVNKAFLDSRTR	3535.91	NP_001277812.1	lactoperoxidase	LPO
LKTTLSSEAPTTQQLSEYFKHAKGQTR	3050.59	NP_001277812.1	lactoperoxidase	LPO
LKTTLSSEAPTTQQLSEYFKHAKGQT	2894.49	NP_001277812.1	lactoperoxidase	LPO
DTIAQAASTTTISDAVSKVKIQVNKA	2660.45	NP_001277812.1	lactoperoxidase	LPO
DTIAQAASTTTISDAVSKVK	2007.06	NP_001277812.1	lactoperoxidase	LPO
TTLSSEAPTTQQLSEYFKHAKGQT	2653.31	NP_001277812.1	lactoperoxidase	LPO
AASTTTISDAVSKVKIQVNKA	2132.19	NP_001277812.1	lactoperoxidase	LPO
TRLKTTLSSEAPTTQQLSEYFKHAKGQT	3151.64	NP_001277812.1	lactoperoxidase	LPO
ASTTTISDAVSKVKIQVNK	1990.12	NP_001277812.1	lactoperoxidase	LPO
TRLKTTLSSEAPTTQQLSEYFKHAKGQTR	3307.74	NP_001277812.1	lactoperoxidase	LPO
HAKGQTRTAIRNGQVWEESFKRL	2712.44	NP_001277812.1	lactoperoxidase	LPO
TAIRNGQVWEESFKRL	1934.02	NP_001277812.1	lactoperoxidase	LPO
AIRNGQVWEESFKRL	1832.98	NP_001277812.1	lactoperoxidase	LPO
LSSEAPTTQQLSEYFKHAKGQT	2451.22	NP_001277812.1	lactoperoxidase	LPO
LKTTLSSEAPTTQQLSEYFK	2272.17	NP_001277812.1	lactoperoxidase	LPO
LSSEAPTTQQLSEYFKHAKGQTRT	2708.36	NP_001277812.1	lactoperoxidase	LPO
LSSEAPTTQQLSEYFKHAKGQTR	2607.32	NP_001277812.1	lactoperoxidase	LPO
ASTTTISDAVSKVK	1407.77	NP_001277812.1	lactoperoxidase	LPO
QVWEESFKRL	1321.69	NP_001277812.1	lactoperoxidase	LPO
GQVWEESFKRL	1378.71	NP_001277812.1	lactoperoxidase	LPO
IRNGQVWEESFKRL	1761.94	NP_001277812.1	lactoperoxidase	LPO
AFLDSRTRLKTTLSSEAPTTQQLSEYFKHAKGQTR	3997.09	NP_001277812.1	lactoperoxidase	LPO
ASTTTISDAVSKVKIQVNKAFLDSRTR	2936.62	NP_001277812.1	lactoperoxidase	LPO
NGQVWEESFKRL	1492.75	NP_001277812.1	lactoperoxidase	LPO
TIAQAASTTTISDAVSKVK	1892.03	NP_001277812.1	lactoperoxidase	LPO
RNGQVWEESFKRL	1648.86	NP_001277812.1	lactoperoxidase	LPO
TTLSSEAPTTQQLSEYFK	2030.99	NP_001277812.1	lactoperoxidase	LPO
DTIAQAASTTTISDAVSKVKIQVN	2461.31	NP_001277812.1	lactoperoxidase	LPO
ASTTTISDAVSKVKIQVNKAFLDSR	2679.47	NP_001277812.1	lactoperoxidase	LPO
DTIAQAASTTTISDAVSK	1779.9	NP_001277812.1	lactoperoxidase	LPO
AASTTTISDAVSKVK	1478.81	NP_001277812.1	lactoperoxidase	LPO
ASTTTISDAVSKVKIQVNKA	2061.16	NP_001277812.1	lactoperoxidase	LPO
VWEESFKRL	1193.63	NP_001277812.1	lactoperoxidase	LPO
TAIRNGQVWEESFK	1664.84	NP_001277812.1	lactoperoxidase	LPO
AFLDSRTRLKTTLSSEAPTTQQLSEYFKHAKGQT	3840.99	NP_001277812.1	lactoperoxidase	LPO
NGQVWEESFK	1223.57	NP_001277812.1	lactoperoxidase	LPO
GQVWEESFK	1109.53	NP_001277812.1	lactoperoxidase	LPO
KTTLSSEAPTTQQLSEYFK	2159.09	NP_001277812.1	lactoperoxidase	LPO
TRLKTTLSSEAPTTQQLSEYFK	2529.32	NP_001277812.1	lactoperoxidase	LPO
ASTTTISDAVSKVKIQVNKAFLDSRTRL	3049.7	NP_001277812.1	lactoperoxidase	LPO
SSEAPTTQQLSEYFKHAKGQTR	2494.23	NP_001277812.1	lactoperoxidase	LPO
AIRNGQVWEESFK	1563.79	NP_001277812.1	lactoperoxidase	LPO
IRNGQVWEESFK	1492.75	NP_001277812.1	lactoperoxidase	LPO
LSSEAPTTQQLSEYFK	1828.9	NP_001277812.1	lactoperoxidase	LPO
TLSSEAPTTQQLSEYFK	1929.94	NP_001277812.1	lactoperoxidase	LPO
IQVNKAFLDSRTRL	1660.95	NP_001277812.1	lactoperoxidase	LPO
SEAPTTQQLSEYFK	1628.78	NP_001277812.1	lactoperoxidase	LPO
LSSEAPTTQQLSEYFKHAKG	2222.11	NP_001277812.1	lactoperoxidase	LPO
LKTTLSSEAPTTQQLSEYFKHAKGQTRT	3151.64	NP_001277812.1	lactoperoxidase	LPO
VKIQVNKAFLDSRTRL	1888.11	NP_001277812.1	lactoperoxidase	LPO
IQVNKAFLDSRTR	1547.87	NP_001277812.1	lactoperoxidase	LPO
NNMGYEINKVRA	1408.7	NP_001277842.1	lipoprotein lipase precursor
DRITGGKDFRDIESKFALR	2224.18	NP_001277842.1	lipoprotein lipase precursor
GLGDVDQLVK	1043.57	NP_001277842.1	lipoprotein lipase precursor
DIESKFALR	1078.59	NP_001277842.1	lipoprotein lipase precursor
DRITGGKDFRD	1279.64	NP_001277842.1	lipoprotein lipase precursor
AVSEHQLLHDKGKSIQDLR	2174.17	NP_001277878.1	parathyroid hormone-related protein precursor [Bubalus bubalis]
IIVTQTMK	933.544	NP_001277893.1	beta-lactoglobulin precursor [Bubalus bubalis]	lgb
IIVTQTMKGLDIQK	1587.91	NP_001277893.1	beta-lactoglobulin precursor [Bubalus bubalis]	lgb
IVTQTMKGLDIQK	1474.83	NP_001277893.1	beta-lactoglobulin precursor [Bubalus bubalis]	lgb
LINNQFLPYPYYAKPAAVR	2238.21	NP_001277901.1	Kappa-casein	CSN3
LSRYPSYGLNYYQQKPVALINNQFLPYPYYAKPAAVR	4366.28	NP_001277901.1	Kappa-casein	CSN3
INNQFLPYPYYAKPAAVR	2125.12	NP_001277901.1	Kappa-casein	CSN3
SRYPSYGLNYYQQKPVALINNQFLPYPYYAKPAAVR	4253.2	NP_001277901.1	Kappa-casein	CSN3
NNQFLPYPYYAKPAAVR	2012.04	NP_001277901.1	Kappa-casein	CSN3
YQQKPVALINNQFLPYPYYAKPAAVR	3052.64	NP_001277901.1	Kappa-casein	CSN3
YPSYGLNYYQQKPVALINNQFLPYPYYAKPAAVR	4010.06	NP_001277901.1	Kappa-casein	CSN3
LPYPYYAKPAAVR	1508.83	NP_001277901.1	Kappa-casein	CSN3
FLPYPYYAKPAAVR	1655.89	NP_001277901.1	Kappa-casein	CSN3
LSRYPSYGLNYYQQKPVALINNQFLPYPYYAKPA	4040.07	NP_001277901.1	Kappa-casein	CSN3
NQFLPYPYYAKPAAVR	1898	NP_001277901.1	Kappa-casein	CSN3
LSRYPSYGLNYYQQKPVALINNQFLPYPYYAKPAA	4111.11	NP_001277901.1	Kappa-casein	CSN3
IAKYIPIQYVLSRYPSYGLNYYQQKPVA	3335.78	NP_001277901.1	Kappa-casein	CSN3
VPIDIDKTKVK	1255.76	XP_006041251.1	nucleobindin-2
TPKQPAPKPEPSYSEYASVQVQR	2587.32	XP_006042105.2	tyrosine-protein phosphatase non-receptor type substrate 1 isoform X
YPDAVATWLKPDPSQK	1815.93	XP_006042334.2	Osteopontin	OPN
LPVKPTSSGSSEEK	1445.75	XP_006042334.2	Osteopontin	OPN
LPVKPTSSGSSEEKQLNNKYPDAVATWLKPDPSQ	3711.89	XP_006042334.2	Osteopontin	OPN
YPDAVATWLKPDPSQ	1687.83	XP_006042334.2	Osteopontin	OPN
FTPFIPTESTNDGRGDSVAYGLKSRSKKF	3205.63	XP_006042334.2	Osteopontin	OPN
AVATWLKPDPSQK	1440.78	XP_006042334.2	Osteopontin	OPN
NKYPDAVATWLKPDPSQK	2058.07	XP_006042334.2	Osteopontin	OPN
FTPFIPTESTNDGRGDSVAYGLK	2472.2	XP_006042334.2	Osteopontin	OPN
FIPTESTNDGRGDS	1495.67	XP_006042334.2	Osteopontin	OPN
NKYPDAVATWLKPDPSQ	1929.97	XP_006042334.2	Osteopontin	OPN
SNVQSPDATEEDFTSHIESEEMH	2619.08	XP_006042334.2	Osteopontin	OPN
SQTVKEDPMATDSVYAASQMPSRSLL	2812.35	XP_006042431.1	cyclic AMP-responsive element-binding protein 3-like protein 1 isoform X1
ALLDPSFFEKESEKDAAGGPGAPADPGRPTGYSGSSKA	3764.8	XP_006043871.1	polymeric immunoglobulin receptor	PIGR
AGEIQNKALLDPSFFEKESEKD	2495.23	XP_006043871.1	polymeric immunoglobulin receptor	PIGR
AGEIQNKALLDPSFFEKESEKDAAGGPGAPADPGRPTGYSGSSKA	4505.19	XP_006043871.1	polymeric immunoglobulin receptor	PIGR
PSFFEKESEKDAAGGPGAPADPGRPTGYSGSSKA	3352.57	XP_006043871.1	polymeric immunoglobulin receptor	PIGR
AAPAGAAIQSRAGEIQN	1624.84	XP_006043871.1	polymeric immunoglobulin receptor	PIGR
AAPAGAAIQSRAGEIQNK	1752.94	XP_006043871.1	polymeric immunoglobulin receptor	PIGR
ALLDPSFFEKESEKD	1754.85	XP_006043871.1	polymeric immunoglobulin receptor	PIGR
FFEKESEKDAAGGPGAPADPGRPTGYSGSSKA	3168.49	XP_006043871.1	polymeric immunoglobulin receptor	PIGR
SPIFGPEEVTSVEGR	1603.8	XP_006043871.1	polymeric immunoglobulin receptor	PIGR
AAPAGAAIQSR	1012.55	XP_006043871.1	polymeric immunoglobulin receptor	PIGR
APAGAAIQSRAGEIQ	1439.76	XP_006043871.1	polymeric immunoglobulin receptor	PIGR
SEETKENERFTVR	1624.79	XP_006045164.2	complement C3
LSLNEEEIR	1102.57	XP_006045715.2	syntenin-1
DTGAVLLAEFLAGRNLPGGPSELGRVG	2666.43	XP_006048651.2	sulfhydryl oxidase 1 isoform X1
SKSYYDILGVPKSASERQVK	2255.2	XP_006050765.1	DnaJ heat shock protein family (Hsp40) member B9	DNAJB9
FADLSTTLK	995.541	XP_006050774.1	cysteine-rich secretory protein 3	LOC102394104
NVQTEIVNKHNDLRRG	1893	XP_006050774.1	cysteine-rich secretory protein 3	LOC102394104
NVQTEIVNKHNDLR	1679.88	XP_006050774.1	cysteine-rich secretory protein 3	LOC102394104
FADLSTTLKNVQTEIVNKHNDLR	2656.41	XP_006050774.1	cysteine-rich secretory protein 3	LOC102394104
SLIGNPDKSPVVTGR	1539.85	XP_006051131.2	proteinase-activated receptor 2
MGPGTSGSGVSTATVPR	1561.76	XP_006053696.2	LOW QUALITY PROTEIN: sodium/glucose cotransporter 4
ADESLALGKPGKEPR	1567.84	XP_006055021.1	fibroblast growth factor-binding protein 1	LOC102403105
YEGLSYDVDSLHQKHQRA	2146.03	XP_006056808.1	disintegrin and metalloproteinase domain-containing protein 10
EGLSYDVDSLHQKHQRA	1982.97	XP_006056808.1	disintegrin and metalloproteinase domain-containing protein 10
GLSYDVDSLHQKHQRA	1853.93	XP_006056808.1	disintegrin and metalloproteinase domain-containing protein 10
SPTFKSFEEKVENLK	1782.93	XP_006057110.1	tumor protein D52 isoform X1
SVITKKLEDVK	1259.76	XP_006057110.1	tumor protein D52 isoform X1
SASEDIDFDDLSR	1469.64	XP_006060446.1	IST1 homolog isoform X1
ASEDIDFDDLSR	1382.61	XP_006060446.1	IST1 homolog isoform X1
SEDIDFDDLSR	1311.57	XP_006060446.1	IST1 homolog isoform X1
DEAVKPLGL	941.53	XP_006061855.2	LOW QUALITY PROTEIN: fatty acid synthase
GVSGALALLQGARG	1269.73	XP_006062764.1	monocyte differentiation antigen CD14 isoform X1
GADTNPKQYADTIKALRVR	2117.15	XP_006062764.1	monocyte differentiation antigen CD14 isoform X1
GADTNPKQYADTIKALRV	1961.05	XP_006062764.1	monocyte differentiation antigen CD14 isoform X1
YVGTLHENRQGSSVQAQIR	2143.1	XP_006063039.1	receptor-type tyrosine-protein phosphatase gamma isoform X3
ILNEPEDETHLEAQPTDASAQFIRNLQISNEDLSKEPSISREDLISKEQIVIR	6059.08	XP_006063747.1	Glycosylation-dependent cell adhesion molecule 1	Glycam1
ILNEPEDETHLEAQPTDASAQFIR	2724.31	XP_006063747.1	Glycosylation-dependent cell adhesion molecule 2	Glycam1
NLQISNEDLSKEPSISREDLISKEQIVIR	3353.79	XP_006063747.1	Glycosylation-dependent cell adhesion molecule 3	Glycam1
ILNEPEDETHLEAQPTDASAQFIRNLQISNEDLSKEPSISR	4635.28	XP_006063747.1	Glycosylation-dependent cell adhesion molecule 4	Glycam1
ISNEDLSKEPSISREDLISKEQIVIR	2998.61	XP_006063747.1	Glycosylation-dependent cell adhesion molecule 5	Glycam1
SRQPQNQNPKLPLSILKEKHL	2468.41	XP_006063747.1	Glycosylation-dependent cell adhesion molecule 6	Glycam1
SSRQPQNQNPKLPLSILKEKHL	2555.44	XP_006063747.1	Glycosylation-dependent cell adhesion molecule 7	Glycam1
LNEPEDETHLEAQPTDASAQFIR	2611.23	XP_006063747.1	Glycosylation-dependent cell adhesion molecule 8	Glycam1
NAALGSEETTEHTPSDASTTEGKLMELGHK	3141.46	XP_006063747.1	Glycosylation-dependent cell adhesion molecule 9	Glycam1
NAALGSEETTEHTPSDASTTEGK	2333.04	XP_006063747.1	Glycosylation-dependent cell adhesion molecule 10	Glycam1
SSRQPQNQNPKLPLSILKEKH	2442.36	XP_006063747.1	Glycosylation-dependent cell adhesion molecule 11	Glycam1
NQNPKLPLSILKEKHL	1872.11	XP_006063747.1	Glycosylation-dependent cell adhesion molecule 12	Glycam1
LPLSILKEKHL	1290.81	XP_006063747.1	Glycosylation-dependent cell adhesion molecule 13	Glycam1
ILNEPEDETHLEAQPTDASAQFIRNLQISNEDLSKEPSISRED	4879.35	XP_006063747.1	Glycosylation-dependent cell adhesion molecule 14	Glycam1
DETHLEAQPTDASAQFIR	2028.96	XP_006063747.1	Glycosylation-dependent cell adhesion molecule 15	Glycam1
NPKLPLSILKEKHL	1630.01	XP_006063747.1	Glycosylation-dependent cell adhesion molecule 16	Glycam1
SSRQPQNQNPKLPLSILK	2048.16	XP_006063747.1	Glycosylation-dependent cell adhesion molecule 17	Glycam1
ILNEPEDETHLEAQPTDASAQFIRNLQ	3079.5	XP_006063747.1	Glycosylation-dependent cell adhesion molecule 18	Glycam1
KEPSISREDLISKEQIVIR	2240.26	XP_006063747.1	Glycosylation-dependent cell adhesion molecule 19	Glycam1
ILNEPEDETHLEAQPTDASAQFIRNL	2951.44	XP_006063747.1	Glycosylation-dependent cell adhesion molecule 20	Glycam1
IRNLQISNEDLSKEPSISREDLISKEQIVIR	3622.98	XP_006063747.1	Glycosylation-dependent cell adhesion molecule 21	Glycam1
LQISNEDLSKEPSISREDLISKEQIVIR	3239.75	XP_006063747.1	Glycosylation-dependent cell adhesion molecule 22	Glycam1
SSRQPQNQNPKLPLSILKEK	2305.3	XP_006063747.1	Glycosylation-dependent cell adhesion molecule 23	Glycam1
ETHLEAQPTDASAQFIR	1913.94	XP_006063747.1	Glycosylation-dependent cell adhesion molecule 24	Glycam1
LSKEPSISREDLISKEQIVIR	2440.38	XP_006063747.1	Glycosylation-dependent cell adhesion molecule 25	Glycam1
ASAQFIRNLQISNEDLSKEPSISREDLISKEQIVIR	4127.21	XP_006063747.1	Glycosylation-dependent cell adhesion molecule 26	Glycam1
EDLISKEQIVIR	1442.82	XP_006063747.1	Glycosylation-dependent cell adhesion molecule 27	Glycam1
ILNEPEDETHLEAQPTDASAQFIRN	2838.35	XP_006063747.1	Glycosylation-dependent cell adhesion molecule 28	Glycam1
DLISKEQIVIR	1313.78	XP_006063747.1	Glycosylation-dependent cell adhesion molecule 29	Glycam1
LAILNEPEDETHLEAQPTDASAQFIR	2908.43	XP_006063747.1	Glycosylation-dependent cell adhesion molecule 30	Glycam1
LISKEQIVIR	1198.75	XP_006063747.1	Glycosylation-dependent cell adhesion molecule 31	Glycam1
LPLSILKEKH	1177.73	XP_006063747.1	Glycosylation-dependent cell adhesion molecule 32	Glycam1
EPSISREDLISKEQIVIR	2112.17	XP_006063747.1	Glycosylation-dependent cell adhesion molecule 33	Glycam1
EPEDETHLEAQPTDASAQFIR	2384.1	XP_006063747.1	Glycosylation-dependent cell adhesion molecule 34	Glycam1
LEAQPTDASAQFIR	1546.79	XP_006063747.1	Glycosylation-dependent cell adhesion molecule 35	Glycam1
ILNEPEDETH	1196.54	XP_006063747.1	Glycosylation-dependent cell adhesion molecule 36	Glycam1
SKEPSISREDLISKEQIVIR	2327.29	XP_006063747.1	Glycosylation-dependent cell adhesion molecule 37	Glycam1
EAQPTDASAQFIR	1433.7	XP_006063747.1	Glycosylation-dependent cell adhesion molecule 38	Glycam1
EDETHLEAQPTDASAQFIR	2158	XP_006063747.1	Glycosylation-dependent cell adhesion molecule 39	Glycam1
LPLSILKEK	1040.67	XP_006063747.1	Glycosylation-dependent cell adhesion molecule 40	Glycam1
NEPEDETHLEAQPTDASAQFIR	2498.14	XP_006063747.1	Glycosylation-dependent cell adhesion molecule 41	Glycam1
HLEAQPTDASAQFIR	1683.84	XP_006063747.1	Glycosylation-dependent cell adhesion molecule 42	Glycam1
LEAQPTDASAQFIRN	1660.83	XP_006063747.1	Glycosylation-dependent cell adhesion molecule 43	Glycam1
REDLISKEQIVIR	1598.92	XP_006063747.1	Glycosylation-dependent cell adhesion molecule 44	Glycam1
LNEPEDETH	1083.46	XP_006063747.1	Glycosylation-dependent cell adhesion molecule 45	Glycam1
PEDETHLEAQPTDASAQFIR	2255.06	XP_006063747.1	Glycosylation-dependent cell adhesion molecule 46	Glycam1
ILNEPEDETHLEAQPTDASAQFIRNLQIS	3279.61	XP_006063747.1	Glycosylation-dependent cell adhesion molecule 1	Glycam1
AQPTDASAQFIR	1304.66	XP_006063747.1	Glycosylation-dependent cell adhesion molecule 2	Glycam1
THLEAQPTDASAQFIR	1784.89	XP_006063747.1	Glycosylation-dependent cell adhesion molecule 3	Glycam1
EDLISKEQIVIRSS	1616.89	XP_006063747.1	Glycosylation-dependent cell adhesion molecule 4	Glycam1
AQPTDASAQFIRN	1418.7	XP_006063747.1	Glycosylation-dependent cell adhesion molecule 5	Glycam1
ILNEPEDETHLEAQPTDASAQFIRNLQISNEDLSKEPSISREDLIS	5192.55	XP_006063747.1	Glycosylation-dependent cell adhesion molecule 6	Glycam1
SREDLISKEQIVIR	1685.95	XP_006063747.1	Glycosylation-dependent cell adhesion molecule 7	Glycam1
ISREDLISKEQIVIR	1799.04	XP_006063747.1	Glycosylation-dependent cell adhesion molecule 8	Glycam1
SISREDLISKEQIVIR	1886.07	XP_006063747.1	Glycosylation-dependent cell adhesion molecule 9	Glycam1
ILNEPEDETHLE	1438.67	XP_006063747.1	Glycosylation-dependent cell adhesion molecule 10	Glycam1
ILNEPEDETHL	1309.63	XP_006063747.1	Glycosylation-dependent cell adhesion molecule 11	Glycam1
QPQNQNPKLPLS	1363.73	XP_006063747.1	Glycosylation-dependent cell adhesion molecule 12	Glycam1
ASAQFIRNL	1019.56	XP_006063747.1	Glycosylation-dependent cell adhesion molecule 13	Glycam1
GRIFLTGEKANSVLKRYPR	2205.26	XP_006066488.1	transmembrane gamma-carboxyglutamic acid protein 1 isoform X1
RLPQLVGVHTPLQGSSHGAAAIGQPSGELR	3033.63	XP_006066766.1	beta-1,4-galactosyltransferase 1
VYYLAGRDLRRLPQLVGVHTPLQGSSHGAAAIGQPSGELRLR	4509.47	XP_006066766.1	beta-1,4-galactosyltransferase 1
VYYLAGRDLRRLPQLVGVHTPLQGSSHGAAAIGQPSGELR	4240.29	XP_006066766.1	beta-1,4-galactosyltransferase 1
RLPQLVGVHTPLQGSSHGAAAIGQPSGELRL	3146.72	XP_006066766.1	beta-1,4-galactosyltransferase 1
RLPQLVGVHTPLQGSSHGAAAIGQPSGELRLR	3302.82	XP_006066766.1	beta-1,4-galactosyltransferase 1
VYYLAGRDLRRLPQLVGVHTPLQGSSHGAAAIGQPSGELRL	4353.37	XP_006066766.1	beta-1,4-galactosyltransferase 1
GEDDDIYNRL	1209.54	XP_006066766.1	beta-1,4-galactosyltransferase 1
DTVASRVTEAVDVTR	1618.84	XP_006067188.2	perilipin-3 isoform X1
SAKDTVASRVTEAVDVTR	1905	XP_006067188.2	perilipin-3 isoform X1
DMEGELGPEEPLTPQQPR	2022.94	XP_006067602.1	apolipoprotein E
ATIGGVAWIGGKSLEVTK	1787.01	XP_006069634.1	transmembrane protein 263
HSVSVPAGSSLEDVLKNAQEHGRF	2564.29	XP_006069866.2	transcobalamin-2 isoform X1
EAKKVEGFDMVQKPSYYVRLG	2444.26	XP_006070958.1	perilipin 2	PLIN2
AYISTKDQYPYLK	1589.82	XP_006070958.1	perilipin 2	PLIN2
STITGVVDRTKGAVTGSVEKTK	2234.24	XP_006070958.1	perilipin 2	PLIN2
GAKDSVASTITGVVDRTKGAVTGSVEKTK	2862.55	XP_006070958.1	perilipin 2	PLIN2
YLPLTKDELEK	1348.74	XP_006070958.1	perilipin 2	PLIN2
AKDSVASTITGVVDRTKGAVTG	2133.15	XP_006070958.1	perilipin 2	PLIN2
LPLTKDELEKEAKKVEGFDMVQKPSYYVRLG	3610.92	XP_006070958.1	perilipin 2	PLIN2
DLVSSAYISTKDQYPYLK	2091.06	XP_006070958.1	perilipin 2	PLIN2
LPLTKDELEK	1185.67	XP_006070958.1	perilipin 2	PLIN2
GAKDSVASTITGVVDRTKGAVTG	2190.17	XP_006070958.1	perilipin 2	PLIN2
STITGVVDRTKGAVTG	1561.85	XP_006070958.1	perilipin 2	PLIN2
YLPLTKDELEKEAKKVEGFDMVQKPSYYVRLG	3773.98	XP_006070958.1	perilipin 2	PLIN2
ISTKDQYPYLK	1355.72	XP_006070958.1	perilipin 2	PLIN2
STYDLVSSAYISTKDQYPYLK	2442.21	XP_006070958.1	perilipin 2	PLIN2
YISTKDQYPYLK	1518.78	XP_006070958.1	perilipin 2	PLIN2
VEPQLSVVTR	1127.64	XP_006070958.1	perilipin 2	PLIN2
SGVENALTK	918.489	XP_006070958.1	perilipin 2	PLIN2
SINTVLGSRVMQ	1304.7	XP_006070958.1	perilipin 2	PLIN2
AKDSVASTITGVVDRTKGAVTGSVEKTK	2805.53	XP_006070958.1	perilipin 2	PLIN2
SINTVLGSRVM	1176.64	XP_006070958.1	perilipin 2	PLIN2
DELEKEAKKVEGFDMVQKPSYYVRLG	3058.56	XP_006070958.1	perilipin 2	PLIN2
SELLVDQYLPLTKDELEK	2133.13	XP_006070958.1	perilipin 2	PLIN2
DSVASTITGVVDRTKGAVTG	1934.02	XP_006070958.1	perilipin 2	PLIN2
SAYISTKDQYPYLK	1676.85	XP_006070958.1	perilipin 2	PLIN2
VQKPSYYVRLG	1309.73	XP_006070958.1	perilipin 2	PLIN2
DLVSSAYISTK	1183.62	XP_006070958.1	perilipin 2	PLIN2
EPQLSVVTR	1028.57	XP_006070958.1	perilipin 2	PLIN2
DSVASTITGVVDR	1319.68	XP_006070958.1	perilipin 2	PLIN2
EEAKQKGQETISQLH	1725.88	XP_006070958.1	perilipin 2	PLIN2
QPTNQVVANAKGAMTG	1586.8	XP_006070958.1	perilipin 2	PLIN2
VVDRTKGAVTGSVEKTK	1775	XP_006070958.1	perilipin 2	PLIN2
SIQGLPQNIQDR	1368.72	XP_006070958.1	perilipin 2	PLIN2
SSGVENALTK	1005.52	XP_006070958.1	perilipin 2	PLIN2
EAKKVEGFDMVQKPSYYVR	2274.16	XP_006070958.1	perilipin 2	PLIN2
GAKDSVASTITGVVDR	1575.83	XP_006070958.1	perilipin 2	PLIN2
STYDLVSSAYISTK	1534.76	XP_006070958.1	perilipin 2	PLIN2
SELLVDQYLPLTK	1518.84	XP_006070958.1	perilipin 2	PLIN2
RELEELNVPGEIVESLSSSEESITHINK	3138.58	XP_006071186.1	casein beta	CSN2
EELNVPGEIVESLSSSEESITHINKKIEK	3238.67	XP_006071186.1	casein beta	CSN2
LVYPFPGPIPKSLPQNIPPLTQTPVVVPPFLQPEIMGVSKVK	4562.59	XP_006071186.1	casein beta	CSN2
KIEKFQSEEQQQMEDELQDKIHPFAQTQSLVYPFPGPIPK	4728.37	XP_006071186.1	casein beta	CSN2
RELEELNVPGEIVESLSSSEESITHINKKIEK	3636.9	XP_006071186.1	casein beta	CSN2
IEKFQSEEQQQMEDELQDKIHPFAQTQ	3304.54	XP_006071186.1	casein beta	CSN2
EELNVPGEIVESLSSSEESITHINK	2740.35	XP_006071186.1	casein beta	CSN2
SLVYPFPGPIPKSLPQNIPPLTQTPVVVPPFLQPEIMGVSKVK	4649.62	XP_006071186.1	casein beta	CSN2
FQSEEQQQMEDELQDKIHPFAQTQSLVYPFPGPIPK	4230.05	XP_006071186.1	casein beta	CSN2
IEKFQSEEQQQMEDELQDK	2382.08	XP_006071186.1	casein beta	CSN2
KIEKFQSEEQQQMEDELQDK	2510.17	XP_006071186.1	casein beta	CSN2
ELQDKIHPFAQTQSLVYPFPGPIPK	2850.52	XP_006071186.1	casein beta	CSN2
IHPFAQTQSLVYPFPGPIPK	2237.21	XP_006071186.1	casein beta	CSN2
KIHPFAQTQSLVYPFPGPIPK	2365.31	XP_006071186.1	casein beta	CSN2
SEEQQQMEDELQDKIHPFAQTQSLVYPFPGPIPK	3954.92	XP_006071186.1	casein beta	CSN2
IEKFQSEEQQQMEDELQDKIHPFAQTQSLVYPFPGPIPK	4600.27	XP_006071186.1	casein beta	CSN2
EEQQQMEDELQDKIHPFAQTQSLVYPFPGPIPK	3867.89	XP_006071186.1	casein beta	CSN2
AQTQSLVYPFPGPIPK	1742.95	XP_006071186.1	casein beta	CSN2
FQSEEQQQMEDELQDK	2011.85	XP_006071186.1	casein beta	CSN2
EQQQMEDELQDKIHPFAQTQSLVYPFPGPIPK	3738.85	XP_006071186.1	casein beta	CSN2
KFQSEEQQQMEDELQDKIHPFAQTQSLVYPFPGPIPK	4358.14	XP_006071186.1	casein beta	CSN2
QTQSLVYPFPGPIPK	1671.91	XP_006071186.1	casein beta	CSN2
RELEELNVPGEIVESLSSSEESITH	2783.36	XP_006071186.1	casein beta	CSN2
TQSLVYPFPGPIPK	1543.85	XP_006071186.1	casein beta	CSN2
LVYPFPGPIPKSLPQNIPPLTQTPVVVPPFLQPEIMGVSKVKE	4691.63	XP_006071186.1	casein beta	CSN2
DELQDKIHPFAQTQSLVYPFPGPIPK	2965.55	XP_006071186.1	casein beta	CSN2
MEDELQDKIHPFAQTQSLVYPFPGPIPK	3225.63	XP_006071186.1	casein beta	CSN2
FAQTQSLVYPFPGPIPK	1890.02	XP_006071186.1	casein beta	CSN2
SLVYPFPGPIPK	1314.75	XP_006071186.1	casein beta	CSN2
HPFAQTQSLVYPFPGPIPK	2124.13	XP_006071186.1	casein beta	CSN2
KFQSEEQQQMEDELQDK	2139.95	XP_006071186.1	casein beta	CSN2
SLVYPFPGPIPKSLPQNIPPLTQTPVVVPPFLQPEIMGVSKVKE	4778.66	XP_006071186.1	casein beta	CSN2
EDELQDKIHPFAQTQSLVYPFPGPIPK	3094.59	XP_006071186.1	casein beta	CSN2
QSLVYPFPGPIPK	1442.8	XP_006071186.1	casein beta	CSN2
NVPGEIVESLSSSEESITHINK	2369.18	XP_006071186.1	casein beta	CSN2
LVYPFPGPIPK	1227.71	XP_006071186.1	casein beta	CSN2
KIEKFQSEEQQQMEDELQDKIHPFAQTQ	3432.64	XP_006071186.1	casein beta	CSN2
PFAQTQSLVYPFPGPIPK	1987.07	XP_006071186.1	casein beta	CSN2
FQSEEQQQMEDELQDKIHP	2359.05	XP_006071186.1	casein beta	CSN2
EELNVPGEIVESLSSSEESITHIN	2612.26	XP_006071186.1	casein beta	CSN2
QSEEQQQMEDELQDK	1864.79	XP_006071186.1	casein beta	CSN2
QQQMEDELQDKIHPFAQTQSLVYPFPGPIPK	3609.8	XP_006071186.1	casein beta	CSN2
DKIHPFAQTQSLVYPFPGPIPK	2480.33	XP_006071186.1	casein beta	CSN2
LQDKIHPFAQTQSLVYPFPGPIPK	2721.48	XP_006071186.1	casein beta	CSN2
KIEKFQSEEQQQMEDELQDKIHP	2857.37	XP_006071186.1	casein beta	CSN2
KIEKFQSEEQQQMEDELQDKIHPFA	3075.47	XP_006071186.1	casein beta	CSN2
VYPFPGPIPK	1114.63	XP_006071186.1	casein beta	CSN2
QMEDELQDKIHPFAQTQSLVYPFPGPIPK	3353.69	XP_006071186.1	casein beta	CSN2
YPFPGPIPK	1015.56	XP_006071186.1	casein beta	CSN2
EEQQQMEDELQDK	1649.7	XP_006071186.1	casein beta	CSN2
LEELNVPGEIVESLSSSEESITH	2498.21	XP_006071186.1	casein beta	CSN2
FQSEEQQQMEDELQDKIHPFAQTQ	2934.32	XP_006071186.1	casein beta	CSN2
MEDELQDK	1007.43	XP_006071186.1	casein beta	CSN2
FQSEEQQQMEDELQDKIHPF	2506.12	XP_006071186.1	casein beta	CSN2
FQSEEQQQMEDELQDKIHPFAQTQS	3021.35	XP_006071186.1	casein beta	CSN2
FQSEEQQQMEDELQDKIHPFAQTQSLVYPFPGPIP	4101.95	XP_006071186.1	casein beta	CSN2
SLPQNIPPLTQTPVVVPPFLQPEIMGVSKVKEAMAPKHKEMPFPK	4975.7	XP_006071186.1;NP_001277808.1	casein beta	CSN2
SLPQNIPPLTQTPVVVPPFLQPEIMGVSKVKEAMAPKHK	4246.35	XP_006071186.1;NP_001277808.1	casein beta	CSN2
SLPQNIPPLTQTPVVVPPFLQPEIMGVSKVKEAMAPK	3981.2	XP_006071186.1;NP_001277808.1	casein beta	CSN2
SLPQNIPPLTQTPVVVPPFLQPEIMGVSKVKEAMAPKH	4118.25	XP_006071186.1;NP_001277808.1	casein beta	CSN2
SLPQNIPPLTQTPVVVPPFLQPEIMGVSKVK	3353.89	XP_006071186.1;NP_001277808.1	casein beta	CSN2
PPLTQTPVVVPPFLQPEIMGVSKVKEAMAPKHK	3594	XP_006071186.1;NP_001277808.1	casein beta	CSN2
LTQTPVVVPPFLQPEIMGVSKVKEAMAPK	3134.74	XP_006071186.1;NP_001277808.1	casein beta	CSN2
SLPQNIPPLTQTPVVVPPFLQPEIMGVSKVKE	3482.93	XP_006071186.1;NP_001277808.1	casein beta	CSN2
LTQTPVVVPPFLQPEIMGVSKVKEAMAPKH	3271.79	XP_006071186.1;NP_001277808.1	casein beta	CSN2
IPPLTQTPVVVPPFLQPEIMGVSKVKEAMAPK	3441.93	XP_006071186.1;NP_001277808.1	casein beta	CSN2
SLPQNIPPLTQTPVVVPPFLQPEIMGVSK	3126.73	XP_006071186.1;NP_001277808.1	casein beta	CSN2
LPQNIPPLTQTPVVVPPFLQPEIMGVSKVKEAMAPKH	4031.22	XP_006071186.1;NP_001277808.1	casein beta	CSN2
VVPPFLQPEIMGVSKVKEAMAPK	2495.38	XP_006071186.1;NP_001277808.1	casein beta	CSN2
TPVVVPPFLQPEIMGVSKVKEAMAPK	2792.55	XP_006071186.1;NP_001277808.1	casein beta	CSN2
LLYQEPVLGPVRGPFPIIV	2107.23	XP_006071186.1;NP_001277808.1	casein beta	CSN2
YQEPVLGPVRGPFPI	1668.91	XP_006071186.1;NP_001277808.1	casein beta	CSN2
LPQNIPPLTQTPVVVPPFLQPEIMGVSKVKEAMAPK	3894.16	XP_006071186.1;NP_001277808.1	casein beta	CSN2
LLQSWMHQPPQPLPPTVMFPPQSVLSLSQSKVLPVPQK	4260.31	XP_006071186.1;NP_001277808.1	casein beta	CSN2
VKEAMAPKHKEMPFPK	1867.99	XP_006071186.1;NP_001277808.1	casein beta	CSN2
SLPQNIPPLTQTPVVVPPFLQPEIMGVSKVKEA	3553.97	XP_006071186.1;NP_001277808.1	casein beta	CSN2
YQEPVLGPVRGPFPII	1781.99	XP_006071186.1;NP_001277808.1	casein beta	CSN2
VLPVPQKAVPYPQRD	1706.96	XP_006071186.1;NP_001277808.1	casein beta	CSN2
AVPYPQRDMPIQAFLLYQEPVLGPVRGPFP	3395.8	XP_006071186.1;NP_001277808.1	casein beta	CSN2
YQEPVLGPVRGPFP	1555.83	XP_006071186.1;NP_001277808.1	casein beta	CSN2
SLPQNIPPLTQTPVVVPPFLQPEIMGVSKV	3225.8	XP_006071186.1;NP_001277808.1	casein beta	CSN2
NIPPLTQTPVVVPPFLQPEIMGVSKVKEAMAPK	3555.97	XP_006071186.1;NP_001277808.1	casein beta	CSN2
EPVLGPVRGPFP	1264.7	XP_006071186.1;NP_001277808.1	casein beta	CSN2
VLPVPQKAVPYPQR	1591.93	XP_006071186.1;NP_001277808.1	casein beta	CSN2
LTQTPVVVPPFLQPEIMGVSKVKE	2636.47	XP_006071186.1;NP_001277808.1	casein beta	CSN2
PPFLQPEIMGVSKVKEAMAPKHK	2562.39	XP_006071186.1;NP_001277808.1	casein beta	CSN2
YQEPVLGPVRGPFPIIV	1881.06	XP_006071186.1;NP_001277808.1	casein beta	CSN2
SQSKVLPVPQKAVPYPQRD	2137.18	XP_006071186.1;NP_001277808.1	casein beta	CSN2
LSSSEESITHINK	1444.73	XP_006071186.1;NP_001277808.1	casein beta	CSN2
EPVLGPVRGPFPI	1377.79	XP_006071186.1;NP_001277808.1	casein beta	CSN2
VSKVKEAMAPK	1187.68	XP_006071186.1;NP_001277808.1	casein beta	CSN2
IMGVSKVKEAMAPK	1488.83	XP_006071186.1;NP_001277808.1	casein beta	CSN2
IVESLSSSEESITH	1517.73	XP_006071186.1;NP_001277808.1	casein beta	CSN2
EPVLGPVRGPFPII	1490.87	XP_006071186.1;NP_001277808.1	casein beta	CSN2
LYQEPVLGPVRGPFP	1668.91	XP_006071186.1;NP_001277808.1	casein beta	CSN2
LLYQEPVLGPVRGPFPII	2008.16	XP_006071186.1;NP_001277808.1	casein beta	CSN2
LLYQEPVLGPVRGPFP	1781.99	XP_006071186.1;NP_001277808.1	casein beta	CSN2
LLQSWMHQPPQPLPPTVMFPPQSVLSLSQSK	3498.83	XP_006071186.1;NP_001277808.1	casein beta	CSN2
VVPPFLQPEIMGVSKVKEAMAPKH	2632.44	XP_006071186.1;NP_001277808.1	casein beta	CSN2
VPPFLQPEIMGVSKVKEAMAPKH	2533.37	XP_006071186.1;NP_001277808.1	casein beta	CSN2
EPVLGPVRGPF	1167.65	XP_006071186.1;NP_001277808.1	casein beta	CSN2
QEPVLGPVRGPFPII	1618.93	XP_006071186.1;NP_001277808.1	casein beta	CSN2
VLPVPQKAVPYPQRDMPIQAFLLYQEPVLGPVR	3759.08	XP_006071186.1;NP_001277808.1	casein beta	CSN2
EPVLGPVRGPFPIIV	1589.94	XP_006071186.1;NP_001277808.1	casein beta	CSN2
TQTPVVVPPFLQPEIMGVSKVKEAMAPK	3021.65	XP_006071186.1;NP_001277808.1	casein beta	CSN2
FLLYQEPVLGPVRGPFPIIV	2254.3	XP_006071186.1;NP_001277808.1	casein beta	CSN2
VLSLSQSKVLPVPQKAVPYPQRD	2549.44	XP_006071186.1;NP_001277808.1	casein beta	CSN2
SLPQNIPPLTQTPVVVPPFLQPEIMGVSKVKEAM	3685.01	XP_006071186.1;NP_001277808.1	casein beta	CSN2
QEPVLGPVRGPFP	1392.76	XP_006071186.1;NP_001277808.1	casein beta	CSN2
LYQEPVLGPVR	1270.72	XP_006071186.1;NP_001277808.1	casein beta	CSN2
VPYPQRDMPIQ	1343.68	XP_006071186.1;NP_001277808.1	casein beta	CSN2
PVVVPPFLQPEIMGVSKVKEAMAPK	2691.5	XP_006071186.1;NP_001277808.1	casein beta	CSN2
YQEPVLGPVRGP	1311.71	XP_006071186.1;NP_001277808.1	casein beta	CSN2
VLPVPQKAVPYPQRDMPIQAF	2394.3	XP_006071186.1;NP_001277808.1	casein beta	CSN2
VLPVPQKAVPYPQRDMPIQA	2247.23	XP_006071186.1;NP_001277808.1	casein beta	CSN2
YQEPVLGPVR	1157.63	XP_006071186.1;NP_001277808.1	casein beta	CSN2
EPVLGPVRGP	1020.58	XP_006071186.1;NP_001277808.1	casein beta	CSN2
LSLSQSKVLPVPQKAVPYPQR	2335.35	XP_006071186.1;NP_001277808.1	casein beta	CSN2
LLYQEPVLGPVR	1383.8	XP_006071186.1;NP_001277808.1	casein beta	CSN2
VLPVPQKAVPYPQRDMP	1935.05	XP_006071186.1;NP_001277808.1	casein beta	CSN2
IVESLSSSEESITHINK	1872.95	XP_006071186.1;NP_001277808.1	casein beta	CSN2
VLSLSQSKVLPVPQK	1622.98	XP_006071186.1;NP_001277808.1	casein beta	CSN2
LYQEPVLGPVRGP	1424.79	XP_006071186.1;NP_001277808.1	casein beta	CSN2
PEIMGVSKVKEAMAPK	1714.92	XP_006071186.1;NP_001277808.1	casein beta	CSN2
KVLPVPQKAVPYPQRD	1835.05	XP_006071186.1;NP_001277808.1	casein beta	CSN2
VLGPVRGPFP	1038.61	XP_006071186.1;NP_001277808.1	casein beta	CSN2
QEPVLGPVRGPFPIIV	1718	XP_006071186.1;NP_001277808.1	casein beta	CSN2
LTQTPVVVPPFLQPEIMGVSKVK	2507.43	XP_006071186.1;NP_001277808.1	casein beta	CSN2
IPPLTQTPVVVPPFLQPEIMGVSKVKEAMAPKH	3578.98	XP_006071186.1;NP_001277808.1	casein beta	CSN2
LSSSEESITHIN	1316.63	XP_006071186.1;NP_001277808.1	casein beta	CSN2
LPVPQKAVPYPQRDMP	1835.98	XP_006071186.1;NP_001277808.1	casein beta	CSN2
LSQSKVLPVPQK	1323.8	XP_006071186.1;NP_001277808.1	casein beta	CSN2
STSAGGENVHDGIPMDDIPPLR	2278.08	XP_006072877.2	mucin-15
GGENVHDGIPMDDIPPLR	1931.93	XP_006072877.2	mucin-15
TSAGGENVHDGIPMDDIPPLR	2191.04	XP_006072877.2	mucin-15
LYDDRNEPVLR	1389.71	XP_006072877.2	mucin-15
IPMDDIPPLR	1166.62	XP_006072877.2	mucin-15
AGGENVHDGIPMDDIPPLR	2002.97	XP_006072877.2	mucin-15
YDDRNEPVLR	1276.63	XP_006072877.2	mucin-15
DGIPMDDIPPLR	1338.67	XP_006072877.2	mucin-15
GIPMDDIPPLR	1223.65	XP_006072877.2	mucin-15
SAGGENVHDGIPMDDIPPLR	2090	XP_006072877.2	mucin-15
YNPTANDSSTSAGGENVHDGIPMDDIPPLR	3140.42	XP_006072877.2	mucin-15
GTIPTAPPSYTGRHLW	1753.9	XP_006073988.1	G-protein coupled receptor family C group 5 member B
ESIRETEVIDPQDLLESR	2129.07	XP_006077692.1	syndecan-4
VGSLNLEELSEMR	1476.74	XP_006077971.1	protein OS-9 isoform X1
VLDLLPKLER	1195.74	XP_006078751.1	extracellular serine/threonine protein kinase FAM20C
AVRGEPGDSAAEEAAALTGEWR	2243.07	XP_025116432.1	cyclin and CBS domain divalent metal cation transport mediator 3
EKEGDQGPNIIPADIIFIVKEKLH	2703.47	XP_025122222.1	dnaJ homolog subfamily B member 13
SATEQEKEKDPFHYDYQTLRIGG	2712.29	XP_025122613.1	FXYD domain-containing ion transport regulator 6
SATEQEKEKDPFHYDYQTLR	2485.16	XP_025122613.1	FXYD domain-containing ion transport regulator 6
SATEQEKEKDPFHYDYQTLRIGGLV	2924.44	XP_025122613.1	FXYD domain-containing ion transport regulator 6
SATEQEKEKDPFHYDYQTLRIGGL	2825.37	XP_025122613.1	FXYD domain-containing ion transport regulator 6
DDPEAHSRPVTPLQLFDGRRN	2420.21	XP_025123371.1	complement C4-like
LPAPELGPRQARA	1375.78	XP_025125544.1	protein canopy homolog 3 isoform X4
LPAPELGPRQA	1148.64	XP_025125544.1	protein canopy homolog 3 isoform X4
LPAPELGPRQ	1077.61	XP_025125544.1	protein canopy homolog 3 isoform X4
LPAPELGPR	949.547	XP_025125544.1	protein canopy homolog 3 isoform X4
LDTSPSGKQGREVFLDSPEAQSFLGSR	2908.44	XP_025125795.1	transmembrane gamma-carboxyglutamic acid protein 2
SEGVAINPARVLDLGPITR	1978.11	XP_025130401.1	pancreatic secretory granule membrane major glycoprotein GP2	GP2
REGYNEPAADVPSER	1689.78	XP_025130975.1	E3 ubiquitin-protein ligase UBR3 isoform X1
DVAMVTGGLGRQLL	1429.78	XP_025132692.1	V-type proton ATPase subunit S1
DVAMVTGGLGRQ	1203.62	XP_025132692.1	V-type proton ATPase subunit S1
PDDKNAPFRQRPFCK	1818.91	XP_025133030.1	WD repeat-containing protein 44
APVNVTTEVK	1057.59	XP_025133680.1	elongation factor 1-alpha 1
EIITPWKLTRE	1385.78	XP_025134027.1	disintegrin and metalloproteinase domain-containing protein 9 isoform X1
GARSGFQQTSHLSSYEIITPWKLTRE	2992.53	XP_025134027.1	disintegrin and metalloproteinase domain-containing protein 9 isoform X1
APSELLRKF	1060.61	XP_025140391.1	dnaJ homolog subfamily C member 1
GMTRDQVREDSKADQFANEWGR	2596.2	XP_025142098.1	serum amyloid A3	SAA3
DQVREDSKADQFANEWGR	2150.98	XP_025142098.1	serum amyloid A3	SAA3
VPELMQNYGGH	1244.57	XP_025142925.1	interferon-induced transmembrane protein 3-like
IVQAVPELMQNYGGH	1655.82	XP_025142925.1	interferon-induced transmembrane protein 3-like
WSGPVGVSWGLRAAAPGGPAPR	2146.13	XP_025143934.1	sortilin 1	SORT1
SGPVGVSWGLR	1114.6	XP_025143934.1	sortilin 1	SORT1
WSGPVGVSWGLRAAAPGGPAPRGGRW	2602.35	XP_025143934.1	sortilin 1	SORT1
NAVPITPTLNREQLSTSEENSKKTVDMESTEVITK	3889.97	XP_025145301.1	Alpha-S2-casein	CASA2
KISQHYQKFTWPQYLKTVYQYQK	3005.57	XP_025145301.1	Alpha-S2-casein	CASA2
NAVPITPTLNREQLSTSEENSKKTVDMESTEVITKK	4018.06	XP_025145301.1	Alpha-S2-casein	CASA2
TVDMESTEVITK	1352.66	XP_025145301.1	Alpha-S2-casein	CASA2
VDMESTEVITK	1251.61	XP_025145301.1	Alpha-S2-casein	CASA2
KISQHYQKFTWPQYLKTVYQYQKAMKPWTQPK	4073.13	XP_025145301.1	Alpha-S2-casein	CASA2
ISQHYQKFTWPQYLKTVYQYQK	2877.47	XP_025145301.1	Alpha-S2-casein	CASA2
VDMESTEVITKK	1379.71	XP_025145301.1	Alpha-S2-casein	CASA2
TVDMESTEVITKK	1480.76	XP_025145301.1	Alpha-S2-casein	CASA2
KTVDMESTEVITK	1480.76	XP_025145301.1	Alpha-S2-casein	CASA2
MESTEVITK	1037.52	XP_025145301.1	Alpha-S2-casein	CASA2
KTVDMESTEVITKK	1608.85	XP_025145301.1	Alpha-S2-casein	CASA2
DMESTEVITK	1152.55	XP_025145301.1	Alpha-S2-casein	CASA2
AVPITPTLNREQLSTSEENSKKTVDMESTEVITK	3775.93	XP_025145301.1	Alpha-S2-casein	CASA2
RNAVPITPTLNREQLSTSEENSKKTVDMESTEVITK	4046.07	XP_025145301.1	Alpha-S2-casein	CASA2
ISQHYQKFTWPQYLKTVYQYQKAMKPWTQPK	3945.03	XP_025145301.1	Alpha-S2-casein	CASA2
NMAIHPSKEVIR	1394.76	XP_025145301.1	Alpha-S2-casein	CASA2
VDMESTEVITKKTK	1608.85	XP_025145301.1	Alpha-S2-casein	CASA2
LNREQLSTSEENSKKTVDMESTEVITK	3096.54	XP_025145301.1	Alpha-S2-casein	CASA2
KISQHYQKFTWPQYLK	2095.11	XP_025145301.1	Alpha-S2-casein	CASA2
TVYQYQKAMKPWTQPKTNVIPYVRYL	3215.71	XP_025145301.1;NP_001277794.1	Alpha-S2-casein	CASA2
KTKLTEEDKNRLNFL	1849.02	XP_025145301.1;NP_001277794.1	Alpha-S2-casein	CASA2
TKLTEEDKNRLNFL	1720.92	XP_025145301.1;NP_001277794.1	Alpha-S2-casein	CASA2
NAVPITPTLNREQLSTSEENSKK	2556.33	XP_025145301.1;NP_001277794.1	Alpha-S2-casein	CASA2
KTKLTEEDKNRLNFLK	1977.11	XP_025145301.1;NP_001277794.1	Alpha-S2-casein	CASA2
AMKPWTQPKTNVIPYVRYL	2305.25	XP_025145301.1;NP_001277794.1	Alpha-S2-casein	CASA2
KPWTQPKTNVIPYVRYL	2103.17	XP_025145301.1;NP_001277794.1	Alpha-S2-casein	CASA2
KHTMEHVSSSEESIISQETYKQEK	2835.35	XP_025145301.1;NP_001277794.1	Alpha-S2-casein	CASA2
KPWTQPKTNVIPYVR	1827.03	XP_025145301.1;NP_001277794.1	Alpha-S2-casein	CASA2
AMKPWTQPKTNVIPYVR	2029.11	XP_025145301.1;NP_001277794.1	Alpha-S2-casein	CASA2
NAVPITPTLNREQLSTSEENSKKT	2657.37	XP_025145301.1;NP_001277794.1	Alpha-S2-casein	CASA2
MEHVSSSEESIISQETYKQEK	2469.14	XP_025145301.1;NP_001277794.1	Alpha-S2-casein	CASA2
NAVPITPTLNREQLSTSEENSK	2428.23	XP_025145301.1;NP_001277794.1	Alpha-S2-casein	CASA2
YQGPIVLNPWDQVKR	1812.98	XP_025145301.1;NP_001277794.1	Alpha-S2-casein	CASA2
LTEEDKNRLNFLK	1619.88	XP_025145301.1;NP_001277794.1	Alpha-S2-casein	CASA2
TVYQYQKAMKPWTQPKTNVIPYVR	2939.56	XP_025145301.1;NP_001277794.1	Alpha-S2-casein	CASA2
TKLTEEDKNRLNFLK	1849.02	XP_025145301.1;NP_001277794.1	Alpha-S2-casein	CASA2
SEESIISQETYKQEK	1798.87	XP_025145301.1;NP_001277794.1	Alpha-S2-casein	CASA2
TVYQYQKAMKPWTQPK	1997.03	XP_025145301.1;NP_001277794.1	Alpha-S2-casein	CASA2
TKLTEEDKNRLNF	1607.84	XP_025145301.1;NP_001277794.1	Alpha-S2-casein	CASA2
MKPWTQPKTNVIPYVRYL	2234.22	XP_025145301.1;NP_001277794.1	Alpha-S2-casein	CASA2
VYQYQKAMKPWTQPKTNVIPYVRYL	3114.66	XP_025145301.1;NP_001277794.1	Alpha-S2-casein	CASA2
YLQYLYQGPIVLNPWDQVKR	2493.33	XP_025145301.1;NP_001277794.1	Alpha-S2-casein	CASA2
LYQGPIVLNPWDQVKR	1926.06	XP_025145301.1;NP_001277794.1	Alpha-S2-casein	CASA2
SSEESIISQETYKQEK	1885.9	XP_025145301.1;NP_001277794.1	Alpha-S2-casein	CASA2
YQGPIVLNPWDQVK	1656.87	XP_025145301.1;NP_001277794.1	Alpha-S2-casein	CASA2
QYLYQGPIVLNPWDQVK	2061.08	XP_025145301.1;NP_001277794.1	Alpha-S2-casein	CASA2
YLYQGPIVLNPWDQVKR	2089.12	XP_025145301.1;NP_001277794.1	Alpha-S2-casein	CASA2
LYQGPIVLNPWDQVK	1769.96	XP_025145301.1;NP_001277794.1	Alpha-S2-casein	CASA2
TKLTEEDKNRLNFLKKISQHYQ	2733.47	XP_025145301.1;NP_001277794.1	Alpha-S2-casein	CASA2
YQKAMKPWTQPKTNVIPYVRYL	2724.47	XP_025145301.1;NP_001277794.1	Alpha-S2-casein	CASA2
IVLNPWDQVKR	1367.78	XP_025145301.1;NP_001277794.1	Alpha-S2-casein	CASA2
IISQETYKQEK	1366.72	XP_025145301.1;NP_001277794.1	Alpha-S2-casein	CASA2
GPIVLNPWDQVK	1365.75	XP_025145301.1;NP_001277794.1	Alpha-S2-casein	CASA2
VLNPWDQVK	1098.59	XP_025145301.1;NP_001277794.1	Alpha-S2-casein	CASA2
LTEEDKNRLNFL	1491.78	XP_025145301.1;NP_001277794.1	Alpha-S2-casein	CASA2
ALNEINQFYQK	1367.7	XP_025145301.1;NP_001277794.1	Alpha-S2-casein	CASA2
ITVDDKHYQ	1118.55	XP_025145301.1;NP_001277794.1	Alpha-S2-casein	CASA2
TEEDKNRLNFLK	1506.79	XP_025145301.1;NP_001277794.1	Alpha-S2-casein	CASA2
TNVIPYVR	961.547	XP_025145301.1;NP_001277794.1	Alpha-S2-casein	CASA2
TNVIPYVRYL	1237.69	XP_025145301.1;NP_001277794.1	Alpha-S2-casein	CASA2
KHTMEHVSSSEESIISQETYK	2450.15	XP_025145301.1;NP_001277794.1	Alpha-S2-casein	CASA2
GPIVLNPWDQVKR	1521.85	XP_025145301.1;NP_001277794.1	Alpha-S2-casein	CASA2
IVLNPWDQVK	1211.68	XP_025145301.1;NP_001277794.1	Alpha-S2-casein	CASA2
RNAVPITPTLNREQLSTSEENSK	2584.33	XP_025145301.1;NP_001277794.1	Alpha-S2-casein	CASA2
TVYQYQKAMKPWTQPKTN	2212.12	XP_025145301.1;NP_001277794.1	Alpha-S2-casein	CASA2
TEEDKNRLNFL	1378.7	XP_025145301.1;NP_001277794.1	Alpha-S2-casein	CASA2
AVPITPTLNREQ	1338.74	XP_025145301.1;NP_001277794.1	Alpha-S2-casein	CASA2
YLYQGPIVLNPWDQVK	1933.02	XP_025145301.1;NP_001277794.1	Alpha-S2-casein	CASA2
KLTEEDKNRLNFL	1619.88	XP_025145301.1;NP_001277794.1	Alpha-S2-casein	CASA2
KHTMEHVSSSEESIISQETYKQE	2707.25	XP_025145301.1;NP_001277794.1	Alpha-S2-casein	CASA2
VSSSEESIISQETYKQEK	2072	XP_025145301.1;NP_001277794.1	Alpha-S2-casein	CASA2
LTEEDKNRLNF	1378.7	XP_025145301.1;NP_001277794.1	Alpha-S2-casein	CASA2
GVSALTRVFAGGKCLSQNPPQSTSR	2561.33	XP_025145337.1	GPI ethanolamine phosphate transferase 2 isoform X1
EKVNELSTDQAMEDIK	1849.88	XP_025145748.1;XP_025145752.1	casein alpha s1	CSN1S1
FPEVFGKEK	1080.57	XP_025145748.1;XP_025145752.1;XP_025145753.1	casein alpha s1	CSN1S1
FPEVFGKE	952.477	XP_025145748.1;XP_025145752.1;XP_025145753.1	casein alpha s1	CSN1S1
RPKQPIKHQGLPQGVLNENLLR	2535.46	XP_025145748.1;XP_025145753.1	casein alpha s1	CSN1S1
RPKQPIKHQGLPQGVLNENLLRFFVAPFPEVFGKEK	4158.31	XP_025145748.1;XP_025145753.1	casein alpha s1	CSN1S1
RPKQPIKHQGLPQGVLNENLLRFFVAPFPEVFGK	3901.18	XP_025145748.1;XP_025145753.1	casein alpha s1	CSN1S1
FVAPFPEVFGKEKV	1593.87	XP_025145748.1;XP_025145753.1	casein alpha s1	CSN1S1
FVAPFPEVFGKEK	1494.8	XP_025145748.1;XP_025145753.1	casein alpha s1	CSN1S1
RPKQPIKHQGLPQGVLNENLLRF	2682.53	XP_025145748.1;XP_025145753.1	casein alpha s1	CSN1S1
RPKQPIKHQGLPQGVLNENLLRFF	2829.6	XP_025145748.1;XP_025145753.1	casein alpha s1	CSN1S1
FFVAPFPEVFGKEKVNE	1984.02	XP_025145748.1;XP_025145753.1	casein alpha s1	CSN1S1
LPQGVLNENLLRF	1512.85	XP_025145748.1;XP_025145753.1	casein alpha s1	CSN1S1
GLPQGVLNENLLRF	1569.87	XP_025145748.1;XP_025145753.1	casein alpha s1	CSN1S1
FFVAPFPEVFGKEK	1641.87	XP_025145748.1;XP_025145753.1	casein alpha s1	CSN1S1
VAPFPEVFGKEKVNE	1689.88	XP_025145748.1;XP_025145753.1	casein alpha s1	CSN1S1
GLPQGVLNENLLR	1422.81	XP_025145748.1;XP_025145753.1	casein alpha s1	CSN1S1
VAPFPEVFGKEK	1347.73	XP_025145748.1;XP_025145753.1	casein alpha s1	CSN1S1
KQPIKHQGLPQGVLNENLLRF	2429.38	XP_025145748.1;XP_025145753.1	casein alpha s1	CSN1S1
GVLNENLLRF	1174.66	XP_025145748.1;XP_025145753.1	casein alpha s1	CSN1S1
FVAPFPEVFGK	1237.66	XP_025145748.1;XP_025145753.1	casein alpha s1	CSN1S1
NENLLRFFVAPFPEVFGK	2124.13	XP_025145748.1;XP_025145753.1	casein alpha s1	CSN1S1
FFVAPFPEVFGK	1384.73	XP_025145748.1;XP_025145753.1	casein alpha s1	CSN1S1
FVAPFPEVFGKE	1366.7	XP_025145748.1;XP_025145753.1	casein alpha s1	CSN1S1
KQPIKHQGLPQGVLNENLLR	2282.31	XP_025145748.1;XP_025145753.1	casein alpha s1	CSN1S1
LPQGVLNENLLR	1365.78	XP_025145748.1;XP_025145753.1	casein alpha s1	CSN1S1
APFPEVFGKEKV	1347.73	XP_025145748.1;XP_025145753.1	casein alpha s1	CSN1S1
VLNENLLRF	1117.64	XP_025145748.1;XP_025145753.1	casein alpha s1	CSN1S1
VAPFPEVFGK	1090.59	XP_025145748.1;XP_025145753.1	casein alpha s1	CSN1S1
FVAPFPEVFGKEKVNE	1836.95	XP_025145748.1;XP_025145753.1	casein alpha s1	CSN1S1
FVAPFPEVFGKEKVNEL	1950.04	XP_025145748.1;XP_025145753.1	casein alpha s1	CSN1S1
VLNENLLR	970.568	XP_025145748.1;XP_025145753.1	casein alpha s1	CSN1S1
APFPEVFGKEK	1248.66	XP_025145748.1;XP_025145753.1	casein alpha s1	CSN1S1
LNENLLRF	1018.57	XP_025145748.1;XP_025145753.1	casein alpha s1	CSN1S1
APFPEVFGK	991.525	XP_025145748.1;XP_025145753.1	casein alpha s1	CSN1S1
GVLNENLLR	1027.59	XP_025145748.1;XP_025145753.1	casein alpha s1	CSN1S1
FFVAPFPEVFGKE	1513.77	XP_025145748.1;XP_025145753.1	casein alpha s1	CSN1S1
PKQPIKHQGLPQGVLNENLLRF	2526.43	XP_025145748.1;XP_025145753.1	casein alpha s1	CSN1S1
LRFFVAPFPEVFGK	1653.92	XP_025145748.1;XP_025145753.1	casein alpha s1	CSN1S1
APFPEVFGKEKVN	1461.77	XP_025145748.1;XP_025145753.1	casein alpha s1	CSN1S1
APFPEVFGKE	1120.57	XP_025145748.1;XP_025145753.1	casein alpha s1	CSN1S1
VAPFPEVFGKE	1219.64	XP_025145748.1;XP_025145753.1	casein alpha s1	CSN1S1
APFPEVFGKEKVNE	1590.82	XP_025145748.1;XP_025145753.1	casein alpha s1	CSN1S1
VAPFPEVFGKEKVN	1560.84	XP_025145748.1;XP_025145753.1	casein alpha s1	CSN1S1
HQGLPQGVLNENLLR	1687.92	XP_025145748.1;XP_025145753.1	casein alpha s1	CSN1S1
HQGLPQGVLNENLLRF	1834.99	XP_025145748.1;XP_025145753.1	casein alpha s1	CSN1S1
PQGVLNENLLRF	1399.77	XP_025145748.1;XP_025145753.1	casein alpha s1	CSN1S1
APFPEVFGKEKVNEL	1703.9	XP_025145748.1;XP_025145753.1	casein alpha s1	CSN1S1
VAPFPEVFGKEKV	1446.8	XP_025145748.1;XP_025145753.1	casein alpha s1	CSN1S1
VAPFPEVFGKEKVNEL	1802.97	XP_025145748.1;XP_025145753.1	casein alpha s1	CSN1S1
FVAPFPEVFGKEKVN	1707.91	XP_025145748.1;XP_025145753.1	casein alpha s1	CSN1S1
VPSERYLGYLEQLLR	1836	XP_025145751.1;XP_025145748.1;XP_025145752.1	casein alpha s1	CSN1S1
YLGYLEQLLRLKK	1636.98	XP_025145751.1;XP_025145748.1;XP_025145752.1	casein alpha s1	CSN1S1
HIQKEDVPSERYLGYLEQLLR	2586.37	XP_025145751.1;XP_025145748.1;XP_025145752.1	casein alpha s1	CSN1S1
HIQKEDVPSERYLGYLEQLLRLK	2827.55	XP_025145751.1;XP_025145748.1;XP_025145752.1	casein alpha s1	CSN1S1
YLGYLEQLLRLK	1508.88	XP_025145751.1;XP_025145748.1;XP_025145752.1	casein alpha s1	CSN1S1
HIQKEDVPSERY	1500.74	XP_025145751.1;XP_025145748.1;XP_025145752.1	casein alpha s1	CSN1S1
YLGYLEQLLRL	1380.79	XP_025145751.1;XP_025145748.1;XP_025145752.1	casein alpha s1	CSN1S1
VPSERYLGYLEQLLRLK	2077.18	XP_025145751.1;XP_025145748.1;XP_025145752.1	casein alpha s1	CSN1S1
HIQKEDVPSER	1337.68	XP_025145751.1;XP_025145748.1;XP_025145752.1	casein alpha s1	CSN1S1
GYLEQLLRLKKY	1523.89	XP_025145751.1;XP_025145748.1;XP_025145752.1	casein alpha s1	CSN1S1
LGYLEQLLRLK	1345.82	XP_025145751.1;XP_025145748.1;XP_025145752.1	casein alpha s1	CSN1S1
LGYLEQLLRL	1217.73	XP_025145751.1;XP_025145748.1;XP_025145752.1	casein alpha s1	CSN1S1
YLGYLEQLLR	1267.7	XP_025145751.1;XP_025145748.1;XP_025145752.1	casein alpha s1	CSN1S1
LGYLEQLLR	1104.64	XP_025145751.1;XP_025145748.1;XP_025145752.1	casein alpha s1	CSN1S1
IQKEDVPSERY	1363.69	XP_025145751.1;XP_025145748.1;XP_025145752.1	casein alpha s1	CSN1S1
KEDVPSERY	1122.54	XP_025145751.1;XP_025145748.1;XP_025145752.1	casein alpha s1	CSN1S1
GYLEQLLRLK	1232.74	XP_025145751.1;XP_025145748.1;XP_025145752.1	casein alpha s1	CSN1S1
GYLEQLLRL	1104.64	XP_025145751.1;XP_025145748.1;XP_025145752.1	casein alpha s1	CSN1S1
YLEQLLRLK	1175.71	XP_025145751.1;XP_025145748.1;XP_025145752.1	casein alpha s1	CSN1S1
HIQKEDVPSERYLGY	1833.91	XP_025145751.1;XP_025145748.1;XP_025145752.1	casein alpha s1	CSN1S1
YLGYLEQLLRLKKY	1800.04	XP_025145751.1;XP_025145748.1;XP_025145752.1	casein alpha s1	CSN1S1
HIQKEDVPSERYLG	1670.85	XP_025145751.1;XP_025145748.1;XP_025145752.1	casein alpha s1	CSN1S1
LEQLLRLK	1012.65	XP_025145751.1;XP_025145748.1;XP_025145752.1	casein alpha s1	CSN1S1
IQKEDVPSERYLGY	1696.85	XP_025145751.1;XP_025145748.1;XP_025145752.1	casein alpha s1	CSN1S1
YLEQLLRLKKY	1466.87	XP_025145751.1;XP_025145748.1;XP_025145752.1	casein alpha s1	CSN1S1
HIQKEDVPSERYLGYLEQLLRLKK	2955.64	XP_025145751.1;XP_025145748.1;XP_025145752.1	casein alpha s1	CSN1S1
YNVPQLEIVPNLAEEQLHSMKEGIHAQQK	3343.71	XP_025145751.1;XP_025145748.1;XP_025145752.1;XP_025145753.1	casein alpha s1	CSN1S1
KYNVPQLEIVPNLAEEQLHSMKEGIHAQQK	3471.81	XP_025145751.1;XP_025145748.1;XP_025145752.1;XP_025145753.1	casein alpha s1	CSN1S1
LKKYNVPQLEIVPNLAEEQLHSMKEGIHAQQK	3712.98	XP_025145751.1;XP_025145748.1;XP_025145752.1;XP_025145753.1	casein alpha s1	CSN1S1
KYNVPQLEIVPNLAEEQLHSMKEGIHAQQ	3343.71	XP_025145751.1;XP_025145748.1;XP_025145752.1;XP_025145753.1	casein alpha s1	CSN1S1
KYNVPQLEIVPNLAEEQLHSMK	2580.35	XP_025145751.1;XP_025145748.1;XP_025145752.1;XP_025145753.1	casein alpha s1	CSN1S1
LKKYNVPQLEIVPNLAEEQLHSMK	2821.53	XP_025145751.1;XP_025145748.1;XP_025145752.1;XP_025145753.1	casein alpha s1	CSN1S1
LKKYNVPQLEIVPNLAEEQLHSMKEGIHAQQ	3584.89	XP_025145751.1;XP_025145748.1;XP_025145752.1;XP_025145753.1	casein alpha s1	CSN1S1
KYNVPQLEIVPNLAEEQLHSMKEG	2766.41	XP_025145751.1;XP_025145748.1;XP_025145752.1;XP_025145753.1	casein alpha s1	CSN1S1
YNVPQLEIVPNLAEEQLHSMKEGIHAQQ	3215.62	XP_025145751.1;XP_025145748.1;XP_025145752.1;XP_025145753.1	casein alpha s1	CSN1S1
EGIHAQQKEPMIGVNQELAYFYPQLFR	3206.61	XP_025145751.1;XP_025145748.1;XP_025145752.1;XP_025145753.1	casein alpha s1	CSN1S1
YNVPQLEIVPNLAEEQLHSM	2324.16	XP_025145751.1;XP_025145748.1;XP_025145752.1;XP_025145753.1	casein alpha s1	CSN1S1
IVPNLAEEQLHSM	1480.75	XP_025145751.1;XP_025145748.1;XP_025145752.1;XP_025145753.1	casein alpha s1	CSN1S1
VPNLAEEQLH	1149.59	XP_025145751.1;XP_025145748.1;XP_025145752.1;XP_025145753.1	casein alpha s1	CSN1S1
EIVPNLAEEQLHSM	1609.79	XP_025145751.1;XP_025145748.1;XP_025145752.1;XP_025145753.1	casein alpha s1	CSN1S1
NVPQLEIVPNLAEEQLHSM	2161.1	XP_025145751.1;XP_025145748.1;XP_025145752.1;XP_025145753.1	casein alpha s1	CSN1S1
LEIVPNLAEEQLHSM	1722.87	XP_025145751.1;XP_025145748.1;XP_025145752.1;XP_025145753.1	casein alpha s1	CSN1S1
LKKYNVPQLEIVPNLAEEQLHSM	2693.43	XP_025145751.1;XP_025145748.1;XP_025145752.1;XP_025145753.1	casein alpha s1	CSN1S1
IPNPIGSENSGKTT	1414.72	XP_025145751.1;XP_025145748.1;XP_025145752.1;XP_025145753.1	casein alpha s1	CSN1S1
YNVPQLEIVPNLAEEQLHS	2193.12	XP_025145751.1;XP_025145748.1;XP_025145752.1;XP_025145753.1	casein alpha s1	CSN1S1
LEIVPNLAEEQLHSMK	1850.97	XP_025145751.1;XP_025145748.1;XP_025145752.1;XP_025145753.1	casein alpha s1	CSN1S1
KYNVPQLEIVPNLAEEQLHS	2321.21	XP_025145751.1;XP_025145748.1;XP_025145752.1;XP_025145753.1	casein alpha s1	CSN1S1
VPNLAEEQLHSM	1367.66	XP_025145751.1;XP_025145748.1;XP_025145752.1;XP_025145753.1	casein alpha s1	CSN1S1
DIPNPIGSENSGKTT	1529.74	XP_025145751.1;XP_025145748.1;XP_025145752.1;XP_025145753.1	casein alpha s1	CSN1S1
IVPNLAEEQLH	1262.67	XP_025145751.1;XP_025145748.1;XP_025145752.1;XP_025145753.1	casein alpha s1	CSN1S1
LEIVPNLAEEQLH	1504.8	XP_025145751.1;XP_025145748.1;XP_025145752.1;XP_025145753.1	casein alpha s1	CSN1S1
NVPQLEIVPNLAEEQLHS	2030.06	XP_025145751.1;XP_025145748.1;XP_025145752.1;XP_025145753.1	casein alpha s1	CSN1S1
LKKYNVPQLEIVPNLAEEQLH	2475.36	XP_025145751.1;XP_025145748.1;XP_025145752.1;XP_025145753.1	casein alpha s1	CSN1S1
IVPNLAEEQLHSMK	1608.84	XP_025145751.1;XP_025145748.1;XP_025145752.1;XP_025145753.1	casein alpha s1	CSN1S1
KYNVPQLEIVPNLAEEQLHSM	2452.25	XP_025145751.1;XP_025145748.1;XP_025145752.1;XP_025145753.1	casein alpha s1	CSN1S1
EIVPNLAEEQLHSMK	1737.88	XP_025145751.1;XP_025145748.1;XP_025145752.1;XP_025145753.1	casein alpha s1	CSN1S1
NVPQLEIVPNLAEEQLH	1943.02	XP_025145751.1;XP_025145748.1;XP_025145752.1;XP_025145753.1	casein alpha s1	CSN1S1
VPQLEIVPNLAEEQLHSM	2047.05	XP_025145751.1;XP_025145748.1;XP_025145752.1;XP_025145753.1	casein alpha s1	CSN1S1
EIVPNLAEEQLH	1391.72	XP_025145751.1;XP_025145748.1;XP_025145752.1;XP_025145753.1	casein alpha s1	CSN1S1
YNVPQLEIVPNLAEEQLH	2106.09	XP_025145751.1;XP_025145748.1;XP_025145752.1;XP_025145753.1	casein alpha s1	CSN1S1
LAEEQLHSM	1057.5	XP_025145751.1;XP_025145748.1;XP_025145752.1;XP_025145753.1	casein alpha s1	CSN1S1
LKKYNVPQLEIVPNLAEEQLHS	2562.39	XP_025145751.1;XP_025145748.1;XP_025145752.1;XP_025145753.1	casein alpha s1	CSN1S1
LEIVPNLAEEQLHS	1591.83	XP_025145751.1;XP_025145748.1;XP_025145752.1;XP_025145753.1	casein alpha s1	CSN1S1
NLAEEQLHSM	1171.54	XP_025145751.1;XP_025145748.1;XP_025145752.1;XP_025145753.1	casein alpha s1	CSN1S1
IPNPIGSENSGKTTMPLW	1941.97	XP_025145751.1;XP_025145748.1;XP_025145752.1;XP_025145753.1	casein alpha s1	CSN1S1
RPKQPIKHQGLPQPFPEVFGK	2428.36	XP_025145751.1;XP_025145752.1	casein alpha s1	CSN1S1
IGSESTEDQAMEDIK	1652.73	XP_025145751.1;XP_025145753.1	casein alpha s1	CSN1S1
RPKQPIKHQGLPQPFPEVFGKEK	2685.5	XP_025145752.1	casein alpha s1	CSN1S1
EKVNELSTDIGSESTEDQAMEDIK	2668.21	XP_025145753.1	casein alpha s1	CSN1S1
KVNELSTDIGSESTEDQAMEDIK	2539.17	XP_025145753.1	casein alpha s1	CSN1S1
VNELSTDIGSESTEDQAMEDIK	2411.08	XP_025145753.1	casein alpha s1	CSN1S1
FFVAPFPEVFGKEKVNELSTDIGSESTEDQAMEDIK	4033.93	XP_025145753.1	casein alpha s1	CSN1S1
LPELSGPSAGRPPAARA	1646.9	XP_025147975.1	membrane protein FAM174A isoform X1
VSNTQDASVSIVDYYEPRRRAV	2525.27	XP_025150659.1	CD109 molecule	CD109
VSNTQDASVSIVDYYEPR	2042.97	XP_025150659.1	CD109 molecule	CD109
VDYYEPR	941.436	XP_025150659.1	CD109 molecule	CD109
WFREKVSPAVFVSREGREQEGEEIAEYR	3383.68	XP_025151074.1	butyrophilin subfamily 1 member A1	BTN1A1
VSPAVFVSREGREQEGEEIAEYR	2637.29	XP_025151074.1	butyrophilin subfamily 1 member A1	BTN1A1
VSLVEDHIAEGRVAVR	1749.96	XP_025151074.1	butyrophilin subfamily 1 member A1	BTN1A1
VSLVEDHIAEGR	1324.69	XP_025151074.1	butyrophilin subfamily 1 member A1	BTN1A1
EKVSPAVFVSREGREQEGEEIAEYR	2894.43	XP_025151074.1	butyrophilin subfamily 1 member A1	BTN1A1
GRVSLVEDHIAEGRVAVR	1963.08	XP_025151074.1	butyrophilin subfamily 1 member A1	BTN1A1
LVEDHIAEGRVAVR	1563.86	XP_025151074.1	butyrophilin subfamily 1 member A1	BTN1A1
KATLHAVDVTLDPDTAHPHLFLYEDSKSVR	3375.73	XP_025151074.1	butyrophilin subfamily 1 member A1	BTN1A1
EGREQEGEEIAEYRGR	1907.88	XP_025151074.1	butyrophilin subfamily 1 member A1	BTN1A1
FREKVSPAVFVSREGREQEGEEIAEYR	3197.6	XP_025151074.1	butyrophilin subfamily 1 member A1	BTN1A1
VFVSREGREQEGEEIAEYR	2283.1	XP_025151074.1	butyrophilin subfamily 1 member A1	BTN1A1
EGREQEGEEIAEYRGRVSLVEDHIAEGR	3213.55	XP_025151074.1	butyrophilin subfamily 1 member A1	BTN1A1
GRVSLVEDHIAEGR	1537.81	XP_025151074.1	butyrophilin subfamily 1 member A1	BTN1A1
EQEGEEIAEYR	1352.6	XP_025151074.1	butyrophilin subfamily 1 member A1	BTN1A1
EGREQEGEEIAEYRGRVS	2093.98	XP_025151074.1	butyrophilin subfamily 1 member A1	BTN1A1
LVEDHIAEGR	1138.59	XP_025151074.1	butyrophilin subfamily 1 member A1	BTN1A1
SLVEDHIAEGR	1225.62	XP_025151074.1	butyrophilin subfamily 1 member A1	BTN1A1
EKVSPAVFVSREGREQEGEEIAEYRGR	3107.55	XP_025151074.1	butyrophilin subfamily 1 member A1	BTN1A1
WFREKVSPAVFVSREGREQEGEEIAEYRGR	3596.8	XP_025151074.1	butyrophilin subfamily 1 member A1	BTN1A1
EGREQEGEEIAEYR	1694.76	XP_025151074.1	butyrophilin subfamily 1 member A1	BTN1A1
EQEGEEIAEYRGRVS	1751.82	XP_025151074.1	butyrophilin subfamily 1 member A1	BTN1A1
SLVEDHIAEGRVAVR	1650.89	XP_025151074.1	butyrophilin subfamily 1 member A1	BTN1A1
REGREQEGEEIAEYR	1850.86	XP_025151074.1	butyrophilin subfamily 1 member A1	BTN1A1
WFREKVSPAVFVSREGR	2050.1	XP_025151074.1	butyrophilin subfamily 1 member A1	BTN1A1
GREQEGEEIAEYR	1565.72	XP_025151074.1	butyrophilin subfamily 1 member A1	BTN1A1
VFVSREGREQEGEEIAEYRGR	2496.22	XP_025151074.1	butyrophilin subfamily 1 member A1	BTN1A1
VSPAVFVSREGREQEGEEIAEYRGR	2850.41	XP_025151074.1	butyrophilin subfamily 1 member A1	BTN1A1
EQEGEEIAEYRGRVSLVEDHIAEGR	2871.39	XP_025151074.1	butyrophilin subfamily 1 member A1	BTN1A1
VEDHIAEGR	1025.5	XP_025151074.1	butyrophilin subfamily 1 member A1	BTN1A1
VEDHIAEGRVAVR	1450.78	XP_025151074.1	butyrophilin subfamily 1 member A1	BTN1A1
EGREQEGEEIAEYRGRVSLVEDHIAEGRVAVR	3638.83	XP_025151074.1	butyrophilin subfamily 1 member A1	BTN1A1
AVFVSREGREQEGEEIAEYR	2354.14	XP_025151074.1	butyrophilin subfamily 1 member A1	BTN1A1
EVEVSIPASLFPR	1443.78	XP_025151074.1	butyrophilin subfamily 1 member A1	BTN1A1
LVEDHIAEGRVA	1308.69	XP_025151074.1	butyrophilin subfamily 1 member A1	BTN1A1
GRVSLVEDHIAEGRVAV	1806.98	XP_025151074.1	butyrophilin subfamily 1 member A1	BTN1A1
FVSREGREQEGEEIAEYR	2184.03	XP_025151074.1	butyrophilin subfamily 1 member A1	BTN1A1
EQEGEEIAEYRG	1409.62	XP_025151074.1	butyrophilin subfamily 1 member A1	BTN1A1
NISKEIPLSPMGEDSASGDIETLHSK	2755.35	XP_025151074.1	butyrophilin subfamily 1 member A1	BTN1A1
REQEGEEIAEYR	1508.7	XP_025151074.1	butyrophilin subfamily 1 member A1	BTN1A1
VSPAVFVSREGREQEGEEIAEYRG	2694.31	XP_025151074.1	butyrophilin subfamily 1 member A1	BTN1A1
EGEEIAEYR	1095.5	XP_025151074.1	butyrophilin subfamily 1 member A1	BTN1A1
IPASLFPRL	1013.61	XP_025151074.1	butyrophilin subfamily 1 member A1	BTN1A1
DAKNISKEIPLSPMGEDSASGDIETLH	2854.38	XP_025151074.1	butyrophilin subfamily 1 member A1	BTN1A1
NLLLGQEKEVEVSIPASLFPR	2339.3	XP_025151074.1	butyrophilin subfamily 1 member A1	BTN1A1
VSPAVFVSREGREQEGEEIAEYRGRVSLVEDHIAEGR	4156.08	XP_025151074.1	butyrophilin subfamily 1 member A1	BTN1A1
VSIPASLFPR	1086.63	XP_025151074.1	butyrophilin subfamily 1 member A1	BTN1A1
GREQEGEEIAEYRGRVS	1964.94	XP_025151074.1	butyrophilin subfamily 1 member A1	BTN1A1
EGEEIAEYRGR	1308.62	XP_025151074.1	butyrophilin subfamily 1 member A1	BTN1A1
IPASLFPRLTP	1211.71	XP_025151074.1	butyrophilin subfamily 1 member A1	BTN1A1
VEDHIAEGRVAV	1294.67	XP_025151074.1	butyrophilin subfamily 1 member A1	BTN1A1
EGREQEGEEIAEYRGRVSL	2207.07	XP_025151074.1	butyrophilin subfamily 1 member A1	BTN1A1
RVSLVEDHIAEGR	1480.79	XP_025151074.1	butyrophilin subfamily 1 member A1	BTN1A1
WFREKVSPAVFVSREGREQEGEEIAEYRG	3440.7	XP_025151074.1	butyrophilin subfamily 1 member A1	BTN1A1
EGREQEGEEIAEYRG	1751.78	XP_025151074.1	butyrophilin subfamily 1 member A1	BTN1A1
VSREGREQEGEEIAEYR	2036.96	XP_025151074.1	butyrophilin subfamily 1 member A1	BTN1A1
SREGREQEGEEIAEYR	1937.89	XP_025151074.1	butyrophilin subfamily 1 member A1	BTN1A1
GREQEGEEIAEYRGRVSLVEDHIAEGR	3084.51	XP_025151074.1	butyrophilin subfamily 1 member A1	BTN1A1
THRGEEFPSMSESRNPDEEGLFTVR	2907.33	XP_025151074.1;NP_001277824.1	butyrophilin subfamily 1 member A1	BTN1A1
GEEFPSMSESRNPDEEGLFTVR	2513.12	XP_025151074.1;NP_001277824.1	butyrophilin subfamily 1 member A1	BTN1A1
MSESRNPDEEGLFTVR	1866.87	XP_025151074.1;NP_001277824.1	butyrophilin subfamily 1 member A1	BTN1A1
IPLSPMGEDSASGDIETLH	1968.92	XP_025151074.1;NP_001277824.1	butyrophilin subfamily 1 member A1	BTN1A1
VDVTLDPDTAHPHLFLYEDSKSVR	2754.37	XP_025151074.1;NP_001277824.1	butyrophilin subfamily 1 member A1	BTN1A1
SPMGEDSASGDIETLH	1645.7	XP_025151074.1;NP_001277824.1	butyrophilin subfamily 1 member A1	BTN1A1
SMSESRNPDEEGLFTVR	1953.9	XP_025151074.1;NP_001277824.1	butyrophilin subfamily 1 member A1	BTN1A1
PDTAHPHLFLYEDSKSVR	2112.05	XP_025151074.1;NP_001277824.1	butyrophilin subfamily 1 member A1	BTN1A1
RGEEFPSMSESRNPDEEGLFTVR	2669.23	XP_025151074.1;NP_001277824.1	butyrophilin subfamily 1 member A1	BTN1A1
SESRNPDEEGLFTVR	1735.82	XP_025151074.1;NP_001277824.1	butyrophilin subfamily 1 member A1	BTN1A1
FREKVSPAVFVSR	1521.85	XP_025151074.1;NP_001277824.1	butyrophilin subfamily 1 member A1	BTN1A1
LSPMGEDSASGDIETLH	1758.79	XP_025151074.1;NP_001277824.1	butyrophilin subfamily 1 member A1	BTN1A1
DPDTAHPHLFLYEDSK	1884.88	XP_025151074.1;NP_001277824.1	butyrophilin subfamily 1 member A1	BTN1A1
NPDEEGLFTVR	1276.62	XP_025151074.1;NP_001277824.1	butyrophilin subfamily 1 member A1	BTN1A1
PDEEGLFTVR	1162.57	XP_025151074.1;NP_001277824.1	butyrophilin subfamily 1 member A1	BTN1A1
FREKVSPAVFVSREG	1707.92	XP_025151074.1;NP_001277824.1	butyrophilin subfamily 1 member A1	BTN1A1
LDPDTAHPHLFLYEDSK	1997.96	XP_025151074.1;NP_001277824.1	butyrophilin subfamily 1 member A1	BTN1A1
KEIPLSPMGEDSASGDIETLH	2226.06	XP_025151074.1;NP_001277824.1	butyrophilin subfamily 1 member A1	BTN1A1
HRGEEFPSMSESRNPDEEGLFTVR	2806.28	XP_025151074.1;NP_001277824.1	butyrophilin subfamily 1 member A1	BTN1A1
WFREKVSPAVFVSR	1707.93	XP_025151074.1;NP_001277824.1	butyrophilin subfamily 1 member A1	BTN1A1
WFREKVSPAVFVSREG	1894	XP_025151074.1;NP_001277824.1	butyrophilin subfamily 1 member A1	BTN1A1
ASGDIETLH	942.453	XP_025151074.1;NP_001277824.1	butyrophilin subfamily 1 member A1	BTN1A1
NEFSSKEKLLEELKWK	2008.07	XP_025151074.1;NP_001277824.1	butyrophilin subfamily 1 member A1	BTN1A1
HPHLFLYEDSK	1385.68	XP_025151074.1;NP_001277824.1	butyrophilin subfamily 1 member A1	BTN1A1
ESRNPDEEGLFTVR	1648.79	XP_025151074.1;NP_001277824.1	butyrophilin subfamily 1 member A1	BTN1A1
EDSASGDIETLH	1273.55	XP_025151074.1;NP_001277824.1	butyrophilin subfamily 1 member A1	BTN1A1
IPLSPMGEDSASGDIETLHSK	2184.05	XP_025151074.1;NP_001277824.1	butyrophilin subfamily 1 member A1	BTN1A1
EEGLFTVR	950.494	XP_025151074.1;NP_001277824.1	butyrophilin subfamily 1 member A1	BTN1A1
REKVSPAVFVSR	1374.79	XP_025151074.1;NP_001277824.1	butyrophilin subfamily 1 member A1	BTN1A1
DEEGLFTVR	1065.52	XP_025151074.1;NP_001277824.1	butyrophilin subfamily 1 member A1	BTN1A1
VSPAVFVSREG	1147.61	XP_025151074.1;NP_001277824.1	butyrophilin subfamily 1 member A1	BTN1A1
SASGDIETLH	1029.48	XP_025151074.1;NP_001277824.1	butyrophilin subfamily 1 member A1	BTN1A1
REKVSPAVFVSREG	1560.85	XP_025151074.1;NP_001277824.1	butyrophilin subfamily 1 member A1	BTN1A1
VAALGSDPHISMK	1325.69	XP_025151074.1;NP_001277824.1	butyrophilin subfamily 1 member A1	BTN1A1
QDENYEEAIVHL	1459.67	XP_025151074.1;NP_001277824.1	butyrophilin subfamily 1 member A1	BTN1A1
VAVRIQEVKASDDGEYR	1934.99	XP_025151074.1;NP_001277824.1	butyrophilin subfamily 1 member A1	BTN1A1
AHPHLFLYEDSK	1456.72	XP_025151074.1;NP_001277824.1	butyrophilin subfamily 1 member A1	BTN1A1
DENYEEAIVHLK	1459.71	XP_025151074.1;NP_001277824.1	butyrophilin subfamily 1 member A1	BTN1A1
QDENYEEAIVHLK	1587.76	XP_025151074.1;NP_001277824.1	butyrophilin subfamily 1 member A1	BTN1A1
VDVTLDPDTAHPH	1416.68	XP_025151074.1;NP_001277824.1	butyrophilin subfamily 1 member A1	BTN1A1
SPAVFVSREG	1048.54	XP_025151074.1;NP_001277824.1	butyrophilin subfamily 1 member A1	BTN1A1
DSASGDIETLH	1144.51	XP_025151074.1;NP_001277824.1	butyrophilin subfamily 1 member A1	BTN1A1
FPSMSESRNPDEEGLFTVR	2198.02	XP_025151074.1;NP_001277824.1	butyrophilin subfamily 1 member A1	BTN1A1
EIPLSPMGEDSASGDIETLHSKLIPLQPSQ	3189.6	XP_025151074.1;NP_001277824.1	butyrophilin subfamily 1 member A1	BTN1A1
IQEVKASDDGEYR	1509.72	XP_025151074.1;NP_001277824.1	butyrophilin subfamily 1 member A1	BTN1A1
VSPAVFVSR	961.547	XP_025151074.1;NP_001277824.1	butyrophilin subfamily 1 member A1	BTN1A1
EKVSPAVFVSR	1218.68	XP_025151074.1;NP_001277824.1	butyrophilin subfamily 1 member A1	BTN1A1
GEEFPSMSESR	1255.53	XP_025151074.1;NP_001277824.1	butyrophilin subfamily 1 member A1	BTN1A1
LLEELKWK	1058.62	XP_025151074.1;NP_001277824.1	butyrophilin subfamily 1 member A1	BTN1A1
EKVSPAVFVSREG	1404.75	XP_025151074.1;NP_001277824.1	butyrophilin subfamily 1 member A1	BTN1A1
GEEFPSMSESRNP	1466.62	XP_025151074.1;NP_001277824.1	butyrophilin subfamily 1 member A1	BTN1A1
HRGEEFPSMSESR	1548.69	XP_025151074.1;NP_001277824.1	butyrophilin subfamily 1 member A1	BTN1A1
ENYEEAIVHLK	1344.68	XP_025151074.1;NP_001277824.1	butyrophilin subfamily 1 member A1	BTN1A1
GEDSASGDIETLH	1330.58	XP_025151074.1;NP_001277824.1	butyrophilin subfamily 1 member A1	BTN1A1
VDVTLDPDTAHPHL	1529.76	XP_025151074.1;NP_001277824.1	butyrophilin subfamily 1 member A1	BTN1A1
IPLSPMGEDSASGDIETLHS	2055.95	XP_025151074.1;NP_001277824.1	butyrophilin subfamily 1 member A1	BTN1A1
EIPLSPMGEDSASGDIETLH	2097.96	XP_025151074.1;NP_001277824.1	butyrophilin subfamily 1 member A1	BTN1A1
KEIPLSPMGEDSASGDIETLHSK	2441.19	XP_025151074.1;NP_001277824.1	butyrophilin subfamily 1 member A1	BTN1A1
RNPDEEGLFTVR	1432.72	XP_025151074.1;NP_001277824.1	butyrophilin subfamily 1 member A1	BTN1A1
THRGEEFPSMSESR	1649.73	XP_025151074.1;NP_001277824.1	butyrophilin subfamily 1 member A1	BTN1A1
DVTLDPDTAHPH	1317.61	XP_025151074.1;NP_001277824.1	butyrophilin subfamily 1 member A1	BTN1A1
VAPEEHPVLLTEAPLNPK	1954.06	XP_025130274.1	actin beta	ACTB
EITALAPSTMK	1161.62	XP_025130274.1	actin beta	ACTB
FAWPQYLKTVYQYQKAMKPWTQPK	3030.57	NP_001277794.1	Alpha-S2-casein	CASA2
NAVPITPTLNREQLSTSEENSKKTVDMESTEVFTK	3923.95	NP_001277794.1	Alpha-S2-casein	CASA2
DMESTEVFTK	1186.53	NP_001277794.1	Alpha-S2-casein	CASA2
EQLSTSEENSKKTVDMESTEVITK	2713.31	XP_025145301.1	Alpha-S2-casein	CASA2
SSEESIISQETYK	1500.71	XP_025145301.1;NP_001277794.1	Alpha-S2-casein	CASA2
TVYQYQKAMKPWTQPKTNVIPYVRY	3102.62	XP_025145301.1;NP_001277794.1	Alpha-S2-casein	CASA2
IPNSLPQNIPPLTQTPVVVPPFLQPEIMGVSKVKEAMAPKHKEMPFPK	5299.88	NP_001277808.1	casein beta	CSN2
IPNSLPQNIPPLTQTPVVVPPFLQPEIMGVSKVKEAMAPK	4305.38	NP_001277808.1	casein beta	CSN2
VSPAVFVSREGREQE	1689.86	XP_025151074.1	butyrophilin subfamily 1 member A1	BTN1A1
MADEAESLEDLGFKGAHTTQKGHAKARP	2995.47	XP_006061631.2	casein alpha s1	CSN1S1
RPKQPIKHQGLPQGVLNENLLRFFVAPFPEVFGKEKV	4257.38	XP_025145748.1;XP_025145753.1	casein alpha s1	CSN1S1
KQPIKHQGLPQGVLNENLLRFFVAPFPEVFGK	3648.02	XP_025145748.1;XP_025145753.1	casein alpha s1	CSN1S1
FFVAPFPEVFGKEKV	1740.94	XP_025145748.1;XP_025145753.1	casein alpha s1	CSN1S1
EELNVPGEIVESLSSSEESITHINKK	2868.45	XP_006071186.1	casein beta	CSN2
EKFQSEEQQQMEDELQDK	2268.99	XP_006071186.1	casein beta	CSN2
LTQTPVVVPPFLQPEIMGVSKVKEAMAPKHK	3399.89	XP_006071186.1;NP_001277808.1	casein beta	CSN2
LLYQEPVLGPVRGPFPI	1895.08	XP_006071186.1;NP_001277808.1	casein beta	CSN2
FLLYQEPVLGPVRGPFP	1929.06	XP_006071186.1;NP_001277808.1	casein beta	CSN2
VVPPFLQPEIMGVSKVKEAMAPKHK	2760.53	XP_006071186.1;NP_001277808.1	casein beta	CSN2
AVPYPQRDMPIQAFLLYQEPVLGPVRGPFPII	3621.97	XP_006071186.1;NP_001277808.1	casein beta	CSN2
LSLSQSKVLPVPQK	1523.92	XP_006071186.1;NP_001277808.1	casein beta	CSN2
FLLYQEPVLGPVRGPFPI	2042.15	XP_006071186.1;NP_001277808.1	casein beta	CSN2
APKHKEMPFPK	1309.71	XP_006071186.1;NP_001277808.1	casein beta	CSN2
TQTPVVVPPFLQPEIMGVSKVKEAMAPKH	3158.71	XP_006071186.1;NP_001277808.1	casein beta	CSN2
AMAPKHKEMPFPK	1511.79	XP_006071186.1;NP_001277808.1	casein beta	CSN2
IVDYYEPR	1054.52	XP_025150659.1	CD109 molecule	CD109
NVQTEIVNKHNDLRRGVSPPPRNML	2884.53	XP_006050774.1	cysteine-rich secretory protein 3	LOC102394104
DVEKDEKLIRL	1357.77	XP_006049503.1	DEAD-box helicase 5	DDX5
NRHGSKASADESLALGKPGKEPR	2405.26	XP_006055021.1	fibroblast growth factor-binding protein 1	LOC102403105
PARVLDLGPITR	1307.78	XP_025130401.1	pancreatic secretory granule membrane major glycoprotein GP2	GP2
RQPQNQNPKLPLSILKEKHL	2381.38	XP_006063747.1	Glycosylation-dependent cell adhesion molecule 1	Glycam1
SSRQPQNQNPKLPLSILKEKHLRN	2825.59	XP_006063747.1	Glycosylation-dependent cell adhesion molecule 1	Glycam1
ILNEPEDETHLEAQPTDASAQFIRNLQISNEDLSK	3965.94	XP_006063747.1	Glycosylation-dependent cell adhesion molecule 1	Glycam1
KTTLSSEAPTTQQLSEYFKHAKGQT	2781.41	NP_001277812.1	Lactoperoxidase	LPO
LPLTKDELEKEAKKVEGFDMVQKPSYYVR	3440.81	XP_006070958.1	perilipin 2	PLIN2
STITGVVDRTKGAVTGSVEK	2005.09	XP_006070958.1	perilipin 2	PLIN2
INTVLGSRVMQ	1217.67	XP_006070958.1	perilipin 2	PLIN2
NPLFEKRPKNF	1389.76	XP_006062546.1	ribosomal protein L7a	RPL7A
LPVKPTSSGSSEEKQLNNKYPDAVATWLKPDPSQK	3839.98	XP_006042334.2	Osteopontin	OPN
PTDIPTIAVFTPFIPTESTNDGRGDSVAYGLKSRSKKF	4113.13	XP_006042334.2	Osteopontin	OPN
RSNVQSPDATEEDFTSHIESEEMHDAPK	3186.39	XP_006042334.2	Osteopontin	OPN
VISNARETIQGITDPLLKGMTRDQVREDSKADQFANEWGR	4545.29	XP_025142098.1	serum amyloid A protein isoform X1	SAA3

## Sheet: only_ differential NAS-positive
Peptides increased or exclusively detected in NAS-positive milk. Peptides were considered differentially abundant if they were present only in one condition or showed statistically significant difference (Welch's t-test: FDR 0.01).
Welch's T-test Difference NAS-positive_Healthy		Sequence	Theo. MH+ [Da]	Master Protein Accessions	Protein names	Gene names
2.04489		APAGAAIQSRAGEIQ	1439.76	XP_006043871.1	polymeric immunoglobulin receptor	PIGR
3.44299		VVPPFLQPEIMGVSKVKEAMAPK	2495.38	XP_006071186.1;NP_001277808.1	casein beta	CSN2
1.72686		NAVPITPTLNREQLSTSEENSKKT	2657.37	XP_025145301.1;NP_001277794.1	Alpha-S2-casein	CASA2
3.55239		FVAPFPEVFGKEKV	1593.87	XP_025145748.1;XP_025145753.1	casein alpha s1	CSN1S1
3.69592		VAPFPEVFGKEKV	1446.8	XP_025145748.1;XP_025145753.1	casein alpha s1	CSN1S1
	only NAS-positive	VAPEEHPVLLTEAPLNPK	1954.06	XP_025130274.1	actin beta	ACTB
	only NAS-positive	EITALAPSTMK	1161.62	XP_025130274.1	actin beta	ACTB
	only NAS-positive	FAWPQYLKTVYQYQKAMKPWTQPK	3030.57	NP_001277794.1	Alpha-S2-casein	CASA2
	only NAS-positive	NAVPITPTLNREQLSTSEENSKKTVDMESTEVFTK	3923.95	NP_001277794.1	Alpha-S2-casein	CASA2
	only NAS-positive	DMESTEVFTK	1186.53	NP_001277794.1	Alpha-S2-casein	CASA2
	only NAS-positive	EQLSTSEENSKKTVDMESTEVITK	2713.31	XP_025145301.1	Alpha-S2-casein	CASA2
	only NAS-positive	SSEESIISQETYK	1500.71	XP_025145301.1;NP_001277794.1	Alpha-S2-casein	CASA2
	only NAS-positive	TVYQYQKAMKPWTQPKTNVIPYVRY	3102.62	XP_025145301.1;NP_001277794.1	Alpha-S2-casein	CASA2
	only NAS-positive	IPNSLPQNIPPLTQTPVVVPPFLQPEIMGVSKVKEAMAPKHKEMPFPK	5299.88	NP_001277808.1	casein beta	CSN2
	only NAS-positive	IPNSLPQNIPPLTQTPVVVPPFLQPEIMGVSKVKEAMAPK	4305.38	NP_001277808.1	casein beta	CSN2
	only NAS-positive	VSPAVFVSREGREQE	1689.86	XP_025151074.1	butyrophilin subfamily 1 member A1	BTN1A1
	only NAS-positive	MADEAESLEDLGFKGAHTTQKGHAKARP	2995.47	XP_006061631.2	casein alpha s1	CSN1S1
	only NAS-positive	RPKQPIKHQGLPQGVLNENLLRFFVAPFPEVFGKEKV	4257.38	XP_025145748.1;XP_025145753.1	casein alpha s1	CSN1S1
	only NAS-positive	KQPIKHQGLPQGVLNENLLRFFVAPFPEVFGK	3648.02	XP_025145748.1;XP_025145753.1	casein alpha s1	CSN1S1
	only NAS-positive	FFVAPFPEVFGKEKV	1740.94	XP_025145748.1;XP_025145753.1	casein alpha s1	CSN1S1
	only NAS-positive	EELNVPGEIVESLSSSEESITHINKK	2868.45	XP_006071186.1	casein beta	CSN2
	only NAS-positive	EKFQSEEQQQMEDELQDK	2268.99	XP_006071186.1	casein beta	CSN2
	only NAS-positive	LTQTPVVVPPFLQPEIMGVSKVKEAMAPKHK	3399.89	XP_006071186.1;NP_001277808.1	casein beta	CSN2
	only NAS-positive	LLYQEPVLGPVRGPFPI	1895.08	XP_006071186.1;NP_001277808.1	casein beta	CSN2
	only NAS-positive	FLLYQEPVLGPVRGPFP	1929.06	XP_006071186.1;NP_001277808.1	casein beta	CSN2
	only NAS-positive	VVPPFLQPEIMGVSKVKEAMAPKHK	2760.53	XP_006071186.1;NP_001277808.1	casein beta	CSN2
	only NAS-positive	AVPYPQRDMPIQAFLLYQEPVLGPVRGPFPII	3621.97	XP_006071186.1;NP_001277808.1	casein beta	CSN2
	only NAS-positive	LSLSQSKVLPVPQK	1523.92	XP_006071186.1;NP_001277808.1	casein beta	CSN2
	only NAS-positive	FLLYQEPVLGPVRGPFPI	2042.15	XP_006071186.1;NP_001277808.1	casein beta	CSN2
	only NAS-positive	APKHKEMPFPK	1309.71	XP_006071186.1;NP_001277808.1	casein beta	CSN2
	only NAS-positive	TQTPVVVPPFLQPEIMGVSKVKEAMAPKH	3158.71	XP_006071186.1;NP_001277808.1	casein beta	CSN2
	only NAS-positive	AMAPKHKEMPFPK	1511.79	XP_006071186.1;NP_001277808.1	casein beta	CSN2
	only NAS-positive	IVDYYEPR	1054.52	XP_025150659.1	CD109 molecule	CD109
	only NAS-positive	NVQTEIVNKHNDLRRGVSPPPRNML	2884.53	XP_006050774.1	cysteine-rich secretory protein 3	LOC102394104
	only NAS-positive	DVEKDEKLIRL	1357.77	XP_006049503.1	DEAD-box helicase 5	DDX5
	only NAS-positive	NRHGSKASADESLALGKPGKEPR	2405.26	XP_006055021.1	fibroblast growth factor-binding protein 1	LOC102403105
	only NAS-positive	PARVLDLGPITR	1307.78	XP_025130401.1	pancreatic secretory granule membrane major glycoprotein GP2	GP2
	only NAS-positive	RQPQNQNPKLPLSILKEKHL	2381.38	XP_006063747.1	Glycosylation-dependent cell adhesion molecule 1	Glycam1
	only NAS-positive	SSRQPQNQNPKLPLSILKEKHLRN	2825.59	XP_006063747.1	Glycosylation-dependent cell adhesion molecule 1	Glycam1
	only NAS-positive	ILNEPEDETHLEAQPTDASAQFIRNLQISNEDLSK	3965.94	XP_006063747.1	Glycosylation-dependent cell adhesion molecule 1	Glycam1
	only NAS-positive	KTTLSSEAPTTQQLSEYFKHAKGQT	2781.41	NP_001277812.1	Lactoperoxidase	LPO
	only NAS-positive	LPLTKDELEKEAKKVEGFDMVQKPSYYVR	3440.81	XP_006070958.1	perilipin 2	PLIN2
	only NAS-positive	STITGVVDRTKGAVTGSVEK	2005.09	XP_006070958.1	perilipin 2	PLIN2
	only NAS-positive	INTVLGSRVMQ	1217.67	XP_006070958.1	perilipin 2	PLIN2
	only NAS-positive	NPLFEKRPKNF	1389.76	XP_006062546.1	ribosomal protein L7a	RPL7A
	only NAS-positive	LPVKPTSSGSSEEKQLNNKYPDAVATWLKPDPSQK	3839.98	XP_006042334.2	Osteopontin	OPN
	only NAS-positive	PTDIPTIAVFTPFIPTESTNDGRGDSVAYGLKSRSKKF	4113.13	XP_006042334.2	Osteopontin	OPN
	only NAS-positive	RSNVQSPDATEEDFTSHIESEEMHDAPK	3186.39	XP_006042334.2	Osteopontin	OPN
	only NAS-positive	VISNARETIQGITDPLLKGMTRDQVREDSKADQFANEWGR	4545.29	XP_025142098.1	serum amyloid A3 protein	SAA3

## Sheet: only healthy
Peptides exclusively detected in healthy milk.
Sequence	Theo. MH+ [Da]	Master Protein Accessions	Protein names	Gene names
KKPPQQLEWKLNTGRTEAW	2310.24	XP_025123765.1	advanced glycosylation end-product specific receptor	AGER
NAVPITPTLNREQLSTSEENSKKTVDMESTEVITKKTK	4247.21	XP_025145301.1	casein alpha s2	CSN1S2
FPQYLQYLYQGPIVLNPWDQVKR	2865.51	XP_025145301.1;NP_001277794.1	casein alpha s2	CSN1S2
KTKLTEEDKNRLN	1588.87	XP_025145301.1;NP_001277794.1	casein alpha s2	CSN1S2
LNEINQFYQK	1296.66	XP_025145301.1;NP_001277794.1	casein alpha s2	CSN1S2
TPAQFDAEELR	1276.62	XP_006067744.1	annexin A1	ANXA1
TPAQFDAEELRAAM	1549.73	XP_006067744.1	annexin A1	ANXA1
KTDLEKDIVSDTSGDFRK	2054.04	XP_006043337.1	annexin A2	ANXA2
ELIDQDARDLYDAGVK	1820.9	XP_006043337.1	annexin A2	ANXA2
EQEGEEIAEYRGR	1565.72	XP_025151074.1	butyrophilin subfamily 1 member A1	BTN1A1
FREKVSPAVFVSREGR	1864.02	XP_025151074.1	butyrophilin subfamily 1 member A1	BTN1A1
IPASLFPRLTPWM	1528.83	XP_025151074.1	butyrophilin subfamily 1 member A1	BTN1A1
SPAVFVSREGREQEGEEIAEYR	2538.22	XP_025151074.1	butyrophilin subfamily 1 member A1	BTN1A1
EEFPSMSESRNPDEEGLFTVR	2456.1	XP_025151074.1;NP_001277824.1	butyrophilin subfamily 1 member A1	BTN1A1
DVPSERYLGYLEQLLR	1951.03	XP_025145751.1;XP_025145748.1;XP_025145752.1	casein alpha s1	CSN1S1
KKYNVPQLEIVPNLAEEQLHSM	2580.35	XP_025145751.1;XP_025145748.1;XP_025145752.1;XP_025145753.1	casein alpha s1	CSN1S1
QLEIVPNLAEEQLHSM	1850.93	XP_025145751.1;XP_025145748.1;XP_025145752.1;XP_025145753.1	casein alpha s1	CSN1S1
EKVNELSTDIGSESTEDQAMEDIKEQLLR	3307.58	XP_025145753.1	casein alpha s1	CSN1S1
STDIGSESTEDQAMEDIK	1955.84	XP_025145753.1	casein alpha s1	CSN1S1
LAVRGEPGDSAAEEAAALTGEWR	2356.15	XP_025116432.1	cyclin and CBS domain divalent metal cation transport mediator 3	CNNM3
EIAEAYETLSDANR	1581.74	XP_006050765.1	DnaJ heat shock protein family (Hsp40) member B9	DNAJB9
EGVAINPARVLDLGPITR	1891.08	XP_025130401.1	pancreatic secretory granule membrane major glycoprotein GP2	GP2
NPARVLDLGPITR	1421.82	XP_025130401.1	pancreatic secretory granule membrane major glycoprotein GP2	GP2
SSRQPQNQNPKLPLSILKEKHLRNAA	2967.66	XP_006063747.1	glycosylation-dependent cell adhesion molecule 1	LOC102399155
PQNQNPKLPLSILKEKHL	2097.22	XP_006063747.1	glycosylation-dependent cell adhesion molecule 1	LOC102399155
QPQNQNPKLPLSILKEKH	2112.19	XP_006063747.1	glycosylation-dependent cell adhesion molecule 1	LOC102399155
EQIVIRSSRQPQNQNPKLPLSILKEKHL	3293.88	XP_006063747.1	glycosylation-dependent cell adhesion molecule 1	LOC102399155
LSRYPSYGLNYYQQKPVALINNQFLPYPYYAKPAAVRSPAQIL	4975.63	NP_001277901.1	Kappa-casein	CSN3
QEQNQEQPIR	1269.62	NP_001277901.1	Kappa-casein	CSN3
WPELENGQPTSEKYTVKADGEQSAKPEKAKETEKDDTGTPITKIEFVPSH	5570.74	NP_001277801.1	Na(+)-dependent phosphate cotransporter 2B	Slc34a2
DTIAQAASTTTISDAVSKVKIQVNKAFLDSRT	3379.81	NP_001277812.1	Lactoperoxidase	LPO
DTIAQAASTTTISDAVSKVKIQVNKAFLDSRTRL	3648.99	NP_001277812.1	Lactoperoxidase	LPO
KKVEGFDMVQKPSYYVRLG	2244.18	XP_006070958.1	perilipin 2	PLIN2
IHPFAQTQSLVYPFPGPIPKSLPQNIPPLTQTPVVVPPFLQPEIMGVSKVKEAMAPK	6199.39	XP_006071186.1	casein beta	CSN2
VYPFPGPIPKSLPQNIPPLTQTPVVVPPFLQPEIMGVSKVKEAMAPK	5076.81	XP_006071186.1	casein beta	CSN2
RELEELNVPGEIVESLSSSEESITHIN	3010.49	XP_006071186.1	casein beta	CSN2
LYQEPVLGPVRGPFPIIV	1994.15	XP_006071186.1;NP_001277808.1	casein beta	CSN2
VLPVPQKAVPYPQRDMPIQAFLLYQEPVLGPVRGPFP	4157.28	XP_006071186.1;NP_001277808.1	casein beta	CSN2
FPALTEGYVGTLHENRQGSSVQAQIR	2858.45	XP_006063039.1	protein tyrosine phosphatase receptor type G	PTPRG
NPQGQSQITDPRQAQSSPPWSY	2472.15	XP_025116737.1	RUNX family transcription factor 2	RUNX2
YNAPPEVVAAKMEVK	1645.86	XP_006043251.1	secretoglobin family 1D member	LOC102395773
WSGPVGVSWGLR	1300.68	XP_025143934.1	sortilin 1	SORT1
NYLEDGESDGFLR	1514.68	XP_006067282.1	transmembrane protein 59	TMEM59
VSTKGKRKPRQEEDEDYREFPQKKHKLYGRKQRPKAQPNPK	5005.71	XP_006046217.1	zinc finger protein 512	ZNF512
